# Supplementary material for: DNA Methylation Biomarkers-based Pan-Cancer Classifier: Predictive Modeling for Cancer Classification
Source: Research Square preprint supplement (doi:10.21203/rs.3.rs-7408332/v1), 2025-09-04
Supplement: Supplementary file 1 [file c0a0ca6051dca512e9922b6a.xlsx]

## Sheet: Additional Table 1
CpG	Transformation	CHR	MAPINFO	UCSC_RefGene_Group	Relation_to_UCSC_CpG_Island	UCSC_RefGene_Name
cg03804136	None	17	75369219	TSS200;5'UTR;Body;Body	Island	SEPT9;SEPT9;SEPT9;SEPT9
cg08822118	None	3	184037481	Body;Body;TSS1500;5'UTR;Body		EIF4G1;EIF4G1;EIF4G1;EIF4G1;EIF4G1
cg04586407	None	16	31008574	Body	N_Shore	STX1B
cg03033182	None	4	141177619	TSS1500	S_Shelf	SCOC
cg14663984	None	1	969042	Body	Island	AGRN
cg09994356	None	20	42875779	TSS200	Island	GDAP1L1
cg06508886	None	19	1470292	3'UTR	Island	APC2
cg25307778	None	8	8871457	Body		ERI1
cg02766770	None	2	30372795	5'UTR;5'UTR;5'UTR;5'UTR	S_Shore	YPEL5;YPEL5;YPEL5;YPEL5
cg16041611	None	6	43139680	1stExon	Island	SRF
cg06023791	None	20	3653555	Body;Body	Island	ADAM33;ADAM33
cg09634481	None	6	45345446	Body;Body;5'UTR;5'UTR	Island	RUNX2;RUNX2;SUPT3H;SUPT3H
cg09827752	None	1	2461823	TSS200	Island	HES5
cg11609668	None	11	117075078	3'UTR;3'UTR		TAGLN;TAGLN
cg12790592	None	14	89884273	TSS1500;5'UTR	Island	FOXN3;FOXN3
cg03394150	None	16	28074384	Body	Island	GSG1L
cg04800569	None	19	55888003	TSS200	N_Shore	TMEM190
cg08387285	None	11	86383252	5'UTR;TSS200;5'UTR	Island	ME3;ME3;ME3
cg16337574	None	12	56109265	TSS1500	N_Shore	BLOC1S1
cg05569109	None	2	166650805	TSS200	Island	GALNT3
cg06083330	None	4	147561203	Body	Island	POU4F2
cg01360618	None	3	69591659		Island
cg04499151	None	7	100231278	Body	Island	TFR2
cg06454084	None	19	47158242	Body		DACT3
cg06962177	None	1	63785946		Island
cg11767392	None	11	71814388	Body;TSS200;Body;Body	Island	LRTOMT;C11orf59;LRTOMT;LRTOMT
cg00628697	None	21	38630342	Body	Island	DSCR3
cg14015706	None	9	132382433	1stExon	Island	C9orf50
cg08323075	None	4	5053504	TSS200	Island	STK32B
cg05460949	None	1	219347110	TSS200	Island	LYPLAL1
cg20912169	None	8	67344720	5'UTR;1stExon	Island	ADHFE1;ADHFE1
cg12259256	None	17	42092431	TSS200	Island	TMEM101
cg11130317	None	14	103739856		Island
cg05085230	None	6	133562461	TSS200;TSS200;TSS200	Island	EYA4;EYA4;EYA4
cg23000808	None	19	2289982	3'UTR	Island	LINGO3
cg16823083	None	1	3567412	TSS1500	Island	WDR8
cg09806262	None	10	45914949	Body	S_Shore	ALOX5
cg17839237	None	7	19157193	1stExon;5'UTR	Island	TWIST1;TWIST1
cg24334591	None	13	37005562	TSS1500;TSS1500;TSS1500;TSS1500	N_Shore	CCNA1;CCNA1;CCNA1;CCNA1
cg14794445	None	15	29396429	Body;Body	S_Shore	APBA2;APBA2
cg23878564	None	17	7287449	Body	Island	TNK1
cg17603206	None	10	20104935	TSS1500	Island	PLXDC2
cg11723713	None	2	131721477	Body;Body	Island	ARHGEF4;ARHGEF4
cg22664296	None	4	156680518	Body	Island	GUCY1B3
cg10062065	None	2	220308747	Body	N_Shore	SPEG
cg02700891	None	3	129693586	5'UTR;1stExon	Island	TRH;TRH
cg27215916	None	8	120218354		N_Shelf
cg03667968	None	5	112073438	TSS200;TSS200;5'UTR		APC;APC;APC
cg12422844	None	4	8201125	1stExon;5'UTR		SH3TC1;SH3TC1
cg25774643	None	11	627175	TSS200	Island	SCT
cg07164722	None	1	247587378	Body;Body;Body;Body;Body		NLRP3;NLRP3;NLRP3;NLRP3;NLRP3
cg00067742	None	2	1926888	Body		MYT1L
cg17087479	None	1	214156255		Island
cg04384112	None	16	75339383	Body		CFDP1
cg02212575	None	3	156838403		S_Shore
cg19419519	None	19	39303698	5'UTR;1stExon		LGALS4;LGALS4
cg27116842	None	5	66300503	Body;Body	S_Shore	MAST4;MAST4
cg00424276	None	7	105222180	TSS1500	N_Shore	EFCAB10
cg03229627	None	7	4922039	5'UTR	N_Shore	RADIL
cg20065569	None	14	73958280	Body;1stExon	Island	HEATR4;C14orf169
cg27454883	None	10	102626432
cg19249749	None	1	223853145	1stExon		CAPN8
cg05852537	None	20	33759753	TSS200	N_Shelf	PROCR
cg26519184	None	21	43237089	Body;Body	S_Shore	PRDM15;PRDM15
cg24448269	None	17	54911857	5'UTR	Island	DGKE
cg04659689	None	7	2903377
cg25428929	None	2	242606353	Body;Body	Island	ATG4B;ATG4B
cg19942237	None	7	29603211	TSS1500	Island	PRR15
cg26197699	None	18	43913755	TSS1500	Island	RNF165
cg21477691	None	2	97202475	5'UTR;1stExon	Island	ARID5A;ARID5A
cg22806837	None	19	58011345	5'UTR;1stExon	Island	ZNF773;ZNF773
cg05484949	None	17	38708465
cg27650175	None	9	124461640	Body	N_Shore	DAB2IP
cg03792768	None	3	197281934	5'UTR;5'UTR;5'UTR	Island	BDH1;BDH1;BDH1
cg04784475	None	19	38183130	5'UTR;1stExon	Island	ZNF781;ZNF781
cg21893284	None	X	92928508	TSS1500;TSS1500;TSS1500;1stExon;TSS1500;5'UTR	N_Shore	FAM133A;FAM133A;FAM133A;NAP1L3;FAM133A;NAP1L3
cg20124450	None	15	26108401	TSS200	Island	ATP10A
cg00164583	None	16	88554420	Body	Island	ZFPM1
cg00090619	None	6	33160286	TSS200;TSS200;TSS200;TSS200	N_Shore	COL11A2;COL11A2;COL11A2;COL11A2
cg20782117	None	7	95865631	Body;Body;Body		SLC25A13;SLC25A13;SLC25A13
cg09000178	None	16	67063319	1stExon;1stExon	Island	CBFB;CBFB
cg23255835	None	2	29338121	TSS200	Island	CLIP4
cg02706110	None	22	24552132	Body	Island	CABIN1
cg24719575	None	4	57773768	TSS1500	N_Shore	REST
cg07195011	None	5	11904114	TSS200	Island	CTNND2
cg18693395	None	14	52735421	Body	Island	PTGDR
cg25387565	None	6	31830527	1stExon	Island	NEU1
cg17301223	None	8	145106438	Body	Island	OPLAH
cg16918905	None	2	220361609		Island
cg27009208	None	19	56915658	5'UTR;TSS200;TSS200	Island	ZNF583;ZNF583;ZNF583
cg13874739	None	11	129244236		Island
cg19885761	None	5	175223646	5'UTR;1stExon	Island	CPLX2;CPLX2
cg03767970	None	1	33721234	TSS1500	N_Shore	ZNF362
cg06814792	None	1	120174570	5'UTR		ZNF697
cg17825156	None	1	67391082	5'UTR;TSS1500;5'UTR;5'UTR;5'UTR;Body;5'UTR;Body;TSS1500;5'UTR	Island	MIER1;WDR78;MIER1;MIER1;MIER1;MIER1;MIER1;MIER1;WDR78;MIER1
cg17185404	None	3	70374240
cg23180938	None	5	115152485	TSS200	Island	CDO1
cg05009389	None	15	90208810	3'UTR;3'UTR	Island	PLIN1;PLIN1
cg13592399	None	14	52535758	5'UTR;1stExon	Island	NID2;NID2
cg10575261	None	5	178368160	TSS200	Island	ZNF454
cg12924899	None	13	113718667	Body;Body	N_Shelf	MCF2L;MCF2L
cg04653522	None	11	87908631	TSS200	S_Shore	RAB38
cg06161630	None	7	143106114	TSS200		EPHA1
cg08319417	None	14	23291214		Island
cg05626536	None	8	144801088	Body	Island	MAPK15
cg07142797	None	10	50605613		Island
cg23944804	None	20	11871384	TSS200	Island	BTBD3
cg13478928	None	1	75596724	Body	Island	LHX8
cg13844899	None	7	105221998	TSS200	N_Shore	EFCAB10
cg27162435	None	17	7833163	TSS1500	Island	KCNAB3
cg23891360	None	12	130388234	TSS200	Island	TMEM132D
cg18309286	None	11	77123047	5'UTR;5'UTR	Island	PAK1;PAK1
cg18943693	None	1	155043561		Island
cg01163842	None	14	95235125	Body	Island	GSC
cg16035189	None	3	49028001	1stExon;1stExon	Island	P4HTM;P4HTM
cg26884027	None	1	29586418	Body;Body;Body	Island	PTPRU;PTPRU;PTPRU
cg11716106	None	19	46380134		Island
cg27252696	None	6	100912940	TSS1500	Island	SIM1
cg13068653	None	11	117074303	Body;Body		TAGLN;TAGLN
cg16645983	None	19	49223007	TSS200	N_Shore	MAMSTR
cg13916740	None	19	56904997	TSS200	Island	ZNF582
cg03537386	None	1	32155667	Body		COL16A1
cg25377796	None	4	8643957		N_Shore
cg19851029	None	3	138669137	Body	Island	C3orf72
cg09544728	None	7	601503	Body;Body;Body;Body;Body;Body	Island	PRKAR1B;PRKAR1B;PRKAR1B;PRKAR1B;PRKAR1B;PRKAR1B
cg25688164	None	4	10110163	Body;Body		WDR1;WDR1
cg01936370	None	3	156838174		Island
cg18565132	None	8	103613344		Island
cg14622441	None	17	34058968	5'UTR	S_Shore	RASL10B
cg18823007	None	14	103745432		Island
cg09326362	None	7	100202679	Body	Island	PCOLCE
cg23229395	None	19	58609770	Body;TSS200;TSS200;TSS200	Island	ZSCAN18;ZSCAN18;ZSCAN18;ZSCAN18
cg16292016	None	5	42424356	5'UTR	Island	GHR
cg23498518	None	7	53104336	3'UTR;1stExon	S_Shore	POM121L12;POM121L12
cg19769827	None	1	203259772
cg06226156	None	2	74726478	Body	Island	LBX2
cg15599946	None	3	169482899	TSS200	Island	TERC
cg07360250	None	5	176830358	Body	Island	F12
cg27377863	None	19	16189693	Body;Body	S_Shore	TPM4;TPM4
cg27625055	None	20	41818574	TSS200;TSS200	Island	PTPRT;PTPRT
cg26397265	None	12	25348258	1stExon;TSS200;TSS200;5'UTR;TSS200	Island	LYRM5;CASC1;CASC1;LYRM5;CASC1
cg02721665	None	10	125425583	TSS1500	Island	GPR26
cg06349851	None	3	64193180	5'UTR		PRICKLE2
cg07599144	None	16	30959430	3'UTR;TSS1500	Island	FBXL19;ORAI3
cg13547268	None	1	111746963		Island
cg06943845	None	2	6507982
cg11490961	None	3	123418713	Body;Body;Body;Body		MYLK;MYLK;MYLK;MYLK
cg15258847	None	18	5238219	TSS200;Body	Island	C18orf18;LOC339290
cg21058973	None	20	43029997	1stExon;Body;Body;5'UTR;5'UTR;1stExon;1stExon;Body;5'UTR		HNF4A;HNF4A;HNF4A;HNF4A;HNF4A;HNF4A;HNF4A;HNF4A;HNF4A
cg22444720	None	6	126240414	Body;Body		NCOA7;NCOA7
cg13785196	None	1	32646858	Body	S_Shore	TXLNA
cg09296001	None	7	127672564	Body	Island	SND1
cg23217940	None	15	22954817	Body;TSS1500		CYFIP1;CYFIP1
cg05382012	None	16	67517841	TSS200;TSS1500	S_Shelf	AGRP;AGRP
cg18240331	None	6	10419927	TSS200	Island	TFAP2A
cg17627654	None	11	70508410	Body;TSS1500	Island	SHANK2;SHANK2
cg25729350	None	15	58624534
cg03377355	None	22	39853885	5'UTR	Island	MGAT3
cg17157798	None	12	129595394	Body		TMEM132D
cg16941656	None	13	32605611	1stExon;5'UTR	Island	FRY;FRY
cg02809746	None	16	49312033		Island
cg20294319	None	13	47253842	Body;Body;Body		LRCH1;LRCH1;LRCH1
cg26515460	None	20	983354	TSS1500;TSS1500	S_Shore	RSPO4;RSPO4
cg09695735	None	17	58498977	TSS1500	Island	C17orf64
cg17508991	None	20	30639305	TSS1500	N_Shore	HCK
cg03243226	None	11	105480979	1stExon;5'UTR;5'UTR;1stExon;5'UTR;TSS1500;1stExon	N_Shore	GRIA4;GRIA4;GRIA4;GRIA4;GRIA4;GRIA4;GRIA4
cg14205864	None	13	113841719	Body;Body;Body		PCID2;PCID2;PCID2
cg18242030	None	5	58335271	Body;Body;Body	Island	PDE4D;PDE4D;PDE4D
cg03927133	None	15	41794293	Body	Island	ITPKA
cg00059225	None	5	151304357	1stExon;1stExon;5'UTR;5'UTR	Island	GLRA1;GLRA1;GLRA1;GLRA1
cg16966815	None	1	77333122	TSS200	Island	ST6GALNAC5
cg01262413	None	7	157691541	Body;Body;Body	S_Shore	PTPRN2;PTPRN2;PTPRN2
cg19870512	None	12	4919081	5'UTR;1stExon	Island	KCNA6;KCNA6
cg09888297	None	1	226189878		S_Shelf
cg15542639	None	11	93885254	Body		PANX1
cg02473600	None	2	128173750		Island
cg04593859	None	17	80526279	Body		FOXK2
cg18274325	None	4	110651775	TSS1500	S_Shore	PLA2G12A
cg15169940	None	19	36604614	TSS1500;3'UTR	Island	TBCB;POLR2I
cg09390137	None	2	242824270		S_Shore
cg22659049	None	4	41646672	Body;Body;Body;Body;Body	S_Shore	LIMCH1;LIMCH1;LIMCH1;LIMCH1;LIMCH1
cg05277122	None	14	103538143		N_Shelf
cg08154348	None	6	84562930	TSS200	Island	RIPPLY2
cg10086212	None	12	49484169	Body	Island	DHH
cg00037153	None	3	128216699		Island
cg19607165	None	6	10390961		Island
cg15241920	None	19	54926514	TSS200;TSS200	N_Shore	TTYH1;TTYH1
cg12347429	None	6	21666834	Body	Island	FLJ22536
cg18985581	None	14	105512213		Island
cg12690127	None	12	7055683	TSS200	S_Shore	PTPN6
cg04605590	None	5	148185121
cg24020826	None	8	140630180	3'UTR	N_Shore	KCNK9
cg20392607	None	12	5018798	TSS1500	Island	KCNA1
cg24894531	None	3	137717665	1stExon;5'UTR		CLDN18;CLDN18
cg12473406	None	18	18822927	5'UTR	Island	GREB1L
cg26163578	None	19	57154589		Island
cg17218495	None	19	11071743	5'UTR;TSS200;5'UTR;1stExon;1stExon	Island	SMARCA4;SMARCA4;SMARCA4;SMARCA4;SMARCA4
cg15732079	None	7	22898516		S_Shelf
cg11386025	None	1	41284582	Body;Body	Island	KCNQ4;KCNQ4
cg06410591	None	19	6741181	Body	Island	TRIP10
cg13996405	None	13	36920771	TSS200;5'UTR;1stExon;5'UTR;TSS200	Island	SPG20;SPG20;SPG20;SPG20;SPG20
cg26149167	None	19	16187889	Body;Body	Island	TPM4;TPM4
cg25021051	None	12	53448178	Body;Body;Body	Island	TENC1;TENC1;TENC1
cg14399863	None	9	707166	1stExon;5'UTR;Body	Island	KANK1;KANK1;KANK1
cg13602461	None	8	55066317
cg08798295	None	7	98972169	TSS200	Island	ARPC1B
cg05140806	None	7	155597344	Body	Island	SHH
cg07095997	None	14	61188431	Body	Island	SIX4
cg22646937	None	5	169816792	TSS200;Body		KCNMB1;KCNIP1
cg09184502	None	6	106958474	TSS1500	Island	AIM1
cg00259234	None	17	79844397		N_Shore
cg25611057	None	3	197121419
cg25683325	None	1	158151058	Body	Island	CD1D
cg10239077	None	8	55294882
cg25661931	None	3	123166561	1stExon	Island	ADCY5
cg09618102	None	2	1747364	Body	Island	PXDN
cg18368125	None	16	69385827	TSS200		TMED6
cg27313674	None	20	6035120	TSS1500	S_Shore	LRRN4
cg02066638	None	16	87943038	Body		CA5A
cg24840099	None	4	4864430	Body	N_Shore	MSX1
cg18108818	None	7	102574475	Body;Body;Body;Body		FBXL13;LRRC17;FBXL13;LRRC17
cg20954533	None	5	71462729	Body		MAP1B
cg14539393	None	14	70038949	TSS1500	Island	C14orf162
cg20080878	None	8	126479070
cg03432814	None	12	117037220
cg20095124	None	10	102588691	3'UTR;3'UTR;3'UTR;3'UTR;3'UTR	N_Shore	PAX2;PAX2;PAX2;PAX2;PAX2
cg08958294	None	6	146350131	5'UTR;5'UTR	N_Shore	GRM1;GRM1
cg23728447	None	10	126429267	5'UTR	N_Shelf	FAM53B
cg10791911	None	19	18118800	Body;TSS200	Island	ARRDC2;ARRDC2
cg06353345	None	11	5322976	1stExon		OR51B4
cg26386472	None	12	122277360		Island
cg25208017	None	1	240255486	1stExon	Island	FMN2
cg27062795	None	19	56879613	TSS200;Body;Body;TSS200	Island	ZNF542;ZNF542;ZNF542;ZNF542
cg13754518	None	15	65357972	Body	N_Shelf	RASL12
cg25104105	None	1	14925198	TSS200;TSS200	Island	KIAA1026;KIAA1026
cg23921031	None	11	111789452	TSS200		C11orf52
cg27200446	None	6	41606439	5'UTR	Island	MDFI
cg19656070	None	17	3571978	TSS200;TSS200;TSS200	Island	TMEM93;TAX1BP3;TMEM93
cg01216370	None	2	228736459	Body	Island	WDR69
cg13482308	None	9	37002685	Body	Island	PAX5
cg01360054	None	5	122434944	Body	Island	PRDM6
cg08900316	None	2	46301083	Body		PRKCE
cg11970204	None	10	103245907	Body;Body		BTRC;BTRC
cg22972055	None	7	872293	5'UTR;Body		UNC84A;UNC84A
cg06963109	None	11	61334859	Body	N_Shore	SYT7
cg19579005	None	6	30782272
cg08655589	None	3	14444175	5'UTR;1stExon;1stExon;5'UTR;1stExon;5'UTR	Island	SLC6A6;SLC6A6;SLC6A6;SLC6A6;SLC6A6;SLC6A6
cg15927316	None	1	17944356	Body;Body		ARHGEF10L;ARHGEF10L
cg07655636	None	19	22034418		Island
cg13437581	None	18	44777799		Island
cg04447128	None	16	74771998	Body		FA2H
cg19161124	None	7	153583563	TSS1500	Island	DPP6
cg13809660	None	9	91321362
cg14377596	None	1	201709135	1stExon;Body;5'UTR	Island	NAV1;NAV1;NAV1
cg01423964	None	1	111217575	1stExon;5'UTR	Island	KCNA3;KCNA3
cg01860459	None	3	123419554	Body;Body;Body;Body		MYLK;MYLK;MYLK;MYLK
cg18565702	None	13	113241891	Body	Island	TUBGCP3
cg07821629	None	7	38670840	Body;Body	Island	AMPH;AMPH
cg08948808	None	1	152942003	TSS1500		SPRR4
cg27454102	None	10	32428473
cg04475027	None	12	128752040	Body	Island	TMEM132C
cg15121364	None	19	40324993	TSS200;TSS200;TSS200	Island	DYRK1B;DYRK1B;DYRK1B
cg09556826	None	6	28956259		Island
cg11952315	None	17	42084782	Body	Island	NAGS
cg15244786	None	12	54446279	5'UTR;TSS1500	N_Shore	HOXC4;HOXC4
cg02052142	None	14	60794866		Island
cg01029638	None	7	120628874	TSS1500;1stExon;5'UTR		C7orf58;C7orf58;C7orf58
cg24333629	None	2	229045958	Body;Body	Island	SPHKAP;SPHKAP
cg25568490	None	5	148812353	Body		LOC728264
cg09969277	None	15	89922328	Body	Island	LOC254559
cg07588263	None	8	42396768	1stExon;5'UTR;5'UTR;5'UTR;TSS200;5'UTR;1stExon	Island	C8orf40;C8orf40;C8orf40;SLC20A2;C8orf40;C8orf40;C8orf40
cg23302570	None	2	139538601	TSS1500	Island	NXPH2
cg24847035	None	10	13243216	Body;Body		MCM10;MCM10
cg14485744	None	8	119086710	Body		EXT1
cg03207574	None	10	25241260	Body	Island	PRTFDC1
cg03183872	None	20	3140552	TSS200;TSS200;TSS200	Island	FASTKD5;UBOX5;UBOX5
cg07352438	None	18	5543548	5'UTR	Island	EPB41L3
cg15363487	None	10	17270592	5'UTR	Island	VIM
cg13044675	None	11	65314161	Body;Body;Body	Island	LTBP3;LTBP3;LTBP3
cg16355945	None	12	132654742		S_Shore
cg10400707	None	1	160369840	TSS1500	N_Shore	VANGL2
cg18456523	None	5	54516805		Island
cg21727276	None	20	44036723	5'UTR;5'UTR;TSS200;Body;5'UTR;5'UTR;TSS200	S_Shore	DBNDD2;DBNDD2;DBNDD2;SYS1-DBNDD2;DBNDD2;DBNDD2;DBNDD2
cg24033742	None	1	38493031
cg19113668	None	11	8832111	5'UTR;5'UTR;1stExon;5'UTR		ST5;ST5;ST5;ST5
cg19496978	None	1	120174149	5'UTR		ZNF697
cg18603276	None	17	8023961	3'UTR;3'UTR	Island	HES7;HES7
cg25150846	None	11	2189591	Body;Body;Body	S_Shore	TH;TH;TH
cg13390441	None	9	132962957	Body;Body		FREQ;FREQ
cg15788537	None	11	8378827
cg00303548	None	13	96742413	TSS1500	Island	HS6ST3
cg16291048	None	1	153507498	Body	N_Shore	S100A6
cg24381587	None	1	158736312	1stExon		OR6N1
cg05716166	None	8	85095498	1stExon;TSS200;5'UTR;1stExon;5'UTR	N_Shore	RALYL;RALYL;RALYL;RALYL;RALYL
cg27360326	None	13	53422691	1stExon;5'UTR;1stExon;5'UTR	Island	PCDH8;PCDH8;PCDH8;PCDH8
cg12594581	None	3	196750426	Body;Body		MFI2;MFI2
cg02774855	None	2	29338636	5'UTR	Island	CLIP4
cg01132150	None	5	131782489	Body		C5orf56
cg10236452	None	1	208132590		Island
cg25908973	None	15	45670865	TSS200;1stExon;5'UTR	Island	LOC145663;GATM;GATM
cg10418626	None	14	69052740	Body		RAD51L1
cg13879483	None	12	95942907	TSS1500;5'UTR	Island	USP44;USP44
cg09664216	None	2	240218482	Body		HDAC4
cg13092806	None	2	177043255		Island
cg16306898	None	1	1475675	1stExon	N_Shore	C1orf70
cg18486102	None	12	50297777	TSS200	Island	FAIM2
cg05848863	None	7	16794078	Body	Island	TSPAN13
cg00258081	None	11	43290962
cg05302386	None	14	52734525	1stExon;5'UTR	Island	PTGDR;PTGDR
cg11540007	None	2	145274975	Body;5'UTR;5'UTR	Island	ZEB2;ZEB2;ZEB2
cg14701108	None	2	3131293
cg03226203	None	8	145024637	Body;1stExon;Body;Body	Island	PLEC1;PLEC1;PLEC1;PLEC1
cg15416179	None	17	21189859	Body	S_Shore	MAP2K3
cg08003353	None	13	31407120
cg21039708	None	14	57278729	TSS1500	Island	OTX2OS1
cg00664697	None	16	80061290
cg18805469	None	1	152944810	3'UTR		SPRR4
cg18431951	None	8	144906507	Body;Body;5'UTR		PUF60;PUF60;PUF60
cg20670075	None	12	113909388	5'UTR;1stExon	Island	LHX5;LHX5
cg00904966	None	16	1122937	Body	Island	LOC146336
cg18110444	None	2	136743460	TSS1500	Island	DARS
cg15809077	None	2	112462079
cg20172627	None	2	25439110		Island
cg02849507	None	16	14051717
cg26839871	None	1	171811299	Body;Body	Island	DNM3;DNM3
cg01956420	None	13	110959668	TSS200;5'UTR;1stExon	Island	COL4A1;COL4A2;COL4A2
cg01237565	None	14	105715025	TSS1500;5'UTR;Body	Island	BRF1;BTBD6;BRF1
cg03457729	None	15	89953295		N_Shore
cg12494355	None	9	35688020	Body;Body;Body	N_Shore	TPM2;TPM2;TPM2
cg02064267	None	10	112220471
cg19963589	None	1	54822103	Body;Body;Body	Island	SSBP3;SSBP3;SSBP3
cg13544006	None	20	34189411	Body	Island	FER1L4
cg21669326	None	7	47267691
cg15341124	None	14	102027734	5'UTR;1stExon;TSS1500	Island	DIO3;DIO3;MIR1247
cg19872299	None	17	17686141	5'UTR	Island	RAI1
cg09734791	None	8	72756155	1stExon	Island	MSC
cg14732136	None	17	66031828	TSS200	Island	KPNA2
cg07078225	None	12	52652377		Island
cg21688264	None	6	84418724	Body;5'UTR	Island	SNAP91;SNAP91
cg12424785	None	2	154728133	TSS1500	Island	GALNT13
cg07965774	None	1	17746286	Body;Body	Island	RCC2;RCC2
cg25349729	None	1	214560352	Body	S_Shelf	PTPN14
cg09671951	None	10	104556332	Body;Body		C10orf26;C10orf26
cg19780308	None	4	140754450	Body		MAML3
cg17315219	None	19	48833559	Body	Island	EMP3
cg09159022	None	8	4849522	Body	Island	CSMD1
cg27598340	None	7	55145727	Body;Body;Body;Body		EGFR;EGFR;EGFR;EGFR
cg25958857	None	12	53448399	Body;Body;Body	Island	TENC1;TENC1;TENC1
cg09457490	None	16	15948619	5'UTR;5'UTR;5'UTR;5'UTR	N_Shelf	MYH11;MYH11;MYH11;MYH11
cg21816330	None	17	27044629	Body;Body;5'UTR;Body;5'UTR;1stExon;Body;Body;1stExon	Island	RAB34;RAB34;RAB34;RAB34;RAB34;RAB34;RAB34;RAB34;RAB34
cg15811515	None	16	31580989	TSS200	Island	CSDAP1
cg01312997	None	2	128180646	Body	Island	PROC
cg22968445	None	12	42538818	TSS200;TSS200	Island	GXYLT1;GXYLT1
cg00135888	None	11	57407543	TSS1500		MIR130A
cg04249706	None	10	11206772	Body;TSS1500;Body;TSS1500	N_Shore	CUGBP2;CUGBP2;CUGBP2;CUGBP2
cg27067425	None	19	15695299		Island
cg16811230	None	3	39149235	TSS200;1stExon;5'UTR;1stExon;5'UTR	Island	GORASP1;TTC21A;TTC21A;TTC21A;TTC21A
cg12374721	None	17	46799640	TSS1500;Body	N_Shore	C17orf93;PRAC
cg15187223	None	13	114770074	Body	N_Shelf	RASA3
cg11145461	None	1	201475451	5'UTR;5'UTR	N_Shore	CSRP1;CSRP1
cg10723962	None	6	26240782	1stExon	Island	HIST1H4F
cg21663580	None	6	43044771	Body;Body;Body;Body	Island	PTK7;PTK7;PTK7;PTK7
cg09975620	None	13	28498384	Body	Island	PDX1
cg05224705	None	19	18112040	5'UTR;1stExon	Island	ARRDC2;ARRDC2
cg02155398	None	2	45160490		N_Shore
cg12351856	None	18	19192308	1stExon;5'UTR	Island	SNRPD1;SNRPD1
cg19760241	None	17	35300010	Body	Island	LHX1
cg25580656	None	14	104197160	Body	S_Shelf	ZFYVE21
cg09792881	None	1	50884544	Body	Island	DMRTA2
cg26151206	None	1	158390649	1stExon		OR10K2
cg01791371	None	6	50817193		N_Shore
cg04180868	None	10	25241462	1stExon	Island	PRTFDC1
cg01638592	None	12	111472183	Body	Island	CUX2
cg20234976	None	6	100895907	Body	Island	SIM1
cg13265914	None	8	21999630	TSS200	S_Shore	REEP4
cg20290167	None	17	81040724	Body	N_Shore	METRNL
cg01392544	None	10	18429760	1stExon;1stExon;1stExon;5'UTR;1stExon;1stExon;1stExon;5'UTR;5'UTR	Island	CACNB2;CACNB2;CACNB2;CACNB2;CACNB2;CACNB2;CACNB2;CACNB2;CACNB2
cg14774117	None	6	44310005	TSS1500		SPATS1
cg07974511	None	2	63283013	Body	Island	OTX1
cg01639524	None	6	163818125
cg25201881	None	1	114695527	5'UTR	Island	SYT6
cg25110106	None	1	110167983	TSS200;Body;Body		AMPD2;AMPD2;AMPD2
cg16362232	None	11	430036	Body	N_Shore	ANO9
cg15202738	None	19	53636108	5'UTR;1stExon;Body;5'UTR;5'UTR;1stExon;1stExon	Island	ZNF415;ZNF415;ZNF415;ZNF415;ZNF415;ZNF415;ZNF415
cg26885268	None	7	149389941		Island
cg24487372	None	10	73137135		Island
cg18140889	None	1	153177577	3'UTR		LELP1
cg01396567	None	1	85514226	TSS200	Island	MCOLN3
cg00023001	None	17	55938748		N_Shore
cg26650638	None	16	86320857		Island
cg13895235	None	7	752292	5'UTR;5'UTR;TSS200;5'UTR;5'UTR;5'UTR	S_Shore	PRKAR1B;PRKAR1B;PRKAR1B;PRKAR1B;PRKAR1B;PRKAR1B
cg17384889	None	6	28227068	TSS200	Island	NKAPL
cg21270847	None	1	164604806	Body		PBX1
cg21179088	None	7	54612333	Body	Island	VSTM2A
cg14489474	None	18	905611	Body;Body	Island	ADCYAP1;ADCYAP1
cg02619478	None	8	30248018	Body;Body;Body;Body		RBPMS;RBPMS;RBPMS;RBPMS
cg03327386	None	18	8609878	1stExon	Island	RAB12
cg14602220	None	17	77174120	5'UTR		HRNBP3
cg08189989	None	2	105459164		Island
cg10639411	None	3	73150125
cg18543035	None	10	8374526
cg22942804	None	6	26183572	TSS1500	N_Shore	HIST1H2BE
cg03872376	None	1	238053828	1stExon;Body		ZP4;LOC100130331
cg24884703	None	1	91185422		Island
cg06892005	None	16	4987319	TSS200	Island	PPL
cg03033111	None	4	619167	TSS200;TSS200	N_Shore	PDE6B;PDE6B
cg23983315	None	7	73021609	Body;Body;Body;Body	Island	MLXIPL;MLXIPL;MLXIPL;MLXIPL
cg13023870	None	14	37124018		N_Shore
cg15313459	None	2	68547052	1stExon;1stExon;5'UTR;5'UTR	Island	CNRIP1;CNRIP1;CNRIP1;CNRIP1
cg02585598	None	6	27125472
cg19598567	None	5	141931207
cg26439963	None	10	102587110	3'UTR;Body;Body;Body;Body	Island	PAX2;PAX2;PAX2;PAX2;PAX2
cg09065876	None	17	45949756		Island
cg15431165	None	19	36490314		S_Shelf
cg25060829	None	6	28367571	TSS200;TSS200	Island	ZSCAN12;ZSCAN12
cg09464735	None	5	172175855		Island
cg13798146	None	15	83875703	Body	Island	HDGFRP3
cg00497232	None	4	6665905		Island
cg00380428	None	17	77463587	5'UTR	S_Shelf	HRNBP3
cg02539855	None	8	144241434	1stExon;Body;5'UTR;Body	Island	LY6H;LY6H;LY6H;LY6H
cg23971170	None	1	165326269	TSS1500	Island	LMX1A
cg21790626	None	19	58220494	5'UTR;1stExon	Island	ZNF154;ZNF154
cg03112087	None	4	142053720	1stExon	Island	RNF150
cg24416513	None	2	176994764	5'UTR;1stExon	Island	HOXD8;HOXD8
cg21514227	None	19	15288315	Body	Island	NOTCH3
cg20434586	None	6	43237511	Body	Island	TTBK1
cg08949408	None	10	16562470	Body	Island	C1QL3
cg18061904	None	2	158454110	TSS200;Body;Body;Body	Island	ACVR1C;ACVR1C;ACVR1C;ACVR1C
cg17059564	None	22	35938401	5'UTR	S_Shore	RASD2
cg15768103	None	2	127413936	Body;Body	Island	GYPC;GYPC
cg01425666	None	7	5468436		Island
cg23244790	None	5	140811102	Body;Body;Body;Body;Body;Body;Body;1stExon;Body;Body;Body;Body;Body;1stExon;Body;Body;Body;Body;Body;Body;Body	Island	PCDHGA4;PCDHGA11;PCDHGA11;PCDHGA9;PCDHGA1;PCDHGB1;PCDHGB6;PCDHGA12;PCDHGB3;PCDHGB7;PCDHGA6;PCDHGA8;PCDHGA10;PCDHGA12;PCDHGA5;PCDHGB4;PCDHGA3;PCDHGA2;PCDHGA7;PCDHGB2;PCDHGB5
cg12872693	None	3	179168798	5'UTR	Island	GNB4
cg05809668	None	7	35301188		Island
cg26853371	None	4	1791567		N_Shelf
cg27486637	None	4	176987174	1stExon;5'UTR;1stExon;5'UTR	Island	WDR17;WDR17;WDR17;WDR17
cg04801085	None	14	103150012	Body		RCOR1
cg07281370	None	11	121970768	TSS1500;Body		MIR125B1;LOC399959
cg23408990	None	2	222864086
cg18698788	None	15	89952499		Island
cg21678445	None	18	22930283	Body	Island	ZNF521
cg11095383	None	5	140174887	Body;Body;1stExon;1stExon	Island	PCDHA1;PCDHA1;PCDHA2;PCDHA2
cg09610987	None	3	49028278	Body;Body	Island	P4HTM;P4HTM
cg25053164	None	8	136245226	TSS1500		LOC286094
cg17700915	None	19	52840042	5'UTR;5'UTR;5'UTR	S_Shore	ZNF610;ZNF610;ZNF610
cg22796749	None	14	105512071		Island
cg00687252	None	6	30712060	Body	Island	IER3
cg12799689	None	18	67067893	TSS1500	Island	DOK6
cg03344570	None	13	95202087		Island
cg06732241	None	12	124626058
cg25081106	None	13	88324169	TSS1500	Island	SLITRK5
cg15751452	None	9	129372974		Island
cg01219549	None	9	140683649	Body	Island	EHMT1
cg21105227	None	19	35633669	TSS1500;3'UTR;3'UTR	Island	FXYD7;FXYD1;FXYD1
cg22820188	None	1	156086004	Body;Body;Body	S_Shore	LMNA;LMNA;LMNA
cg20172563	None	6	47487173	Body		CD2AP
cg10333808	None	12	22487459	5'UTR;1stExon	Island	ST8SIA1;ST8SIA1
cg14100888	None	9	129445599	Body	S_Shore	LMX1B
cg01419831	None	2	162283705		Island
cg26765385	None	7	2611244	Body;Body		IQCE;IQCE
cg18192294	None	10	90343204	TSS200;TSS200	Island	RNLS;RNLS
cg09361748	None	7	71682306	Body;Body		CALN1;CALN1
cg05548425	None	17	1553415	TSS200	S_Shore	RILP
cg24654547	None	16	68057165	TSS200;1stExon;5'UTR	Island	DUS2L;DDX28;DDX28
cg24659758	None	10	71891123	5'UTR	N_Shore	AIFM2
cg24415208	None	19	54466441	1stExon	Island	CACNG8
cg20334115	None	1	226107899	3'UTR	N_Shelf	PYCR2
cg24035245	None	1	119535928		Island
cg13376120	None	2	208675738
cg08536228	None	3	63264063	5'UTR;1stExon	Island	SYNPR;SYNPR
cg11344729	None	7	151335190	Body;Body		PRKAG2;PRKAG2
cg13699355	None	2	468179		Island
cg00602326	None	5	31427700	Body;Body		RNASEN;RNASEN
cg03998066	None	16	31482846	TSS1500;TSS1500	N_Shore	TGFB1I1;TGFB1I1
cg14666404	None	3	183016948	Body		MCF2L2
cg17174023	None	22	50987453	1stExon	Island	KLHDC7B
cg15056773	None	3	63264249	Body	S_Shore	SYNPR
cg09861583	None	2	238769419	Body	S_Shore	RAMP1
cg15408855	None	12	106736581	Body		TCP11L2
cg20383521	None	1	151554824	3'UTR;3'UTR		TUFT1;TUFT1
cg02547025	None	2	30454275	TSS200	Island	LBH
cg24390913	None	10	118899788		Island
cg21764708	None	7	151493629	5'UTR;Body		PRKAG2;PRKAG2
cg24034005	None	14	97059192		Island
cg18104645	None	17	75447504	Body;5'UTR;Body;Body;Body;Body	Island	SEPT9;SEPT9;SEPT9;SEPT9;SEPT9;SEPT9
cg20899781	None	2	9705768
cg27227250	None	2	62797865
cg05133853	None	11	5265008	TSS200		HBBP1
cg10222925	None	8	88885186	1stExon	N_Shore	DCAF4L2
cg05702448	None	1	167905194	TSS1500;5'UTR;5'UTR;Body;TSS1500;1stExon	Island	DCAF6;BRP44;BRP44;BRP44;DCAF6;BRP44
cg04462662	None	16	85019773	Body;Body		ZDHHC7;ZDHHC7
cg08239282	None	2	106026162	5'UTR		FHL2
cg07565236	None	16	88869998	TSS200	Island	CDT1
cg07250222	None	10	123358317	TSS1500;TSS1500;TSS1500;TSS1500;TSS1500	S_Shore	FGFR2;FGFR2;FGFR2;FGFR2;FGFR2
cg21647227	None	1	119527111	5'UTR	Island	TBX15
cg06348773	None	16	1087129		N_Shore
cg14508508	None	15	27113322	5'UTR;5'UTR	Island	GABRA5;GABRA5
cg11968071	None	1	32181323		S_Shore
cg04571941	None	7	5463284	TSS200	Island	TNRC18
cg09015905	None	1	10692435
cg20935165	None	2	172972840		Island
cg03905795	None	11	70670880	Body	N_Shore	SHANK2
cg02582848	None	1	224075899
cg26418880	None	12	56123972	TSS1500;TSS1500	S_Shore	CD63;CD63
cg21393713	None	7	69064801	1stExon;1stExon;1stExon	Island	AUTS2;AUTS2;AUTS2
cg19963025	None	22	29426649	Body	Island	ZNRF3
cg09822824	None	11	46867927	TSS200;TSS200	Island	CKAP5;CKAP5
cg04340430	None	2	113967479	Body		LOC440839
cg11977605	None	4	1076247	Body;Body		RNF212;RNF212
cg17355294	None	19	51416098		Island
cg27624229	None	6	32049053	Body	S_Shore	TNXB
cg09308580	None	2	43405947
cg26151531	None	22	19842652	TSS200;TSS1500	Island	GNB1L;C22orf29
cg13924809	None	2	75147126		Island
cg18817426	None	15	75230435	5'UTR;1stExon	Island	COX5A;COX5A
cg07909128	None	1	152957379	5'UTR		SPRR1A
cg04127342	None	8	57358130	Body;Body	Island	PENK;PENK
cg07706776	None	10	5568004	3'UTR;1stExon	S_Shore	CALML3;CALML3
cg13067553	None	1	147782452		Island
cg26915558	None	11	68181218	Body	Island	LRP5
cg05966978	None	10	11207437	Body;5'UTR;Body;5'UTR	Island	CUGBP2;CUGBP2;CUGBP2;CUGBP2
cg22538054	None	12	95941988	5'UTR;5'UTR	Island	USP44;USP44
cg09556952	None	21	38119946	Body	Island	SIM2
cg07452312	None	5	153775466	Body		GALNT10
cg19529732	None	12	122712101	TSS200;TSS200;TSS200;TSS200	S_Shore	DIABLO;DIABLO;DIABLO;DIABLO
cg00501876	None	3	39193251	5'UTR	N_Shore	CSRNP1
cg25467973	None	1	3663705	1stExon;5'UTR	Island	KIAA0495;KIAA0495
cg03458172	None	3	157815672	3'UTR;3'UTR;3'UTR	Island	SHOX2;SHOX2;SHOX2
cg23346462	None	3	179754533	TSS200	Island	PEX5L
cg14535274	None	3	121151186	Body		POLQ
cg01618151	None	6	35707957	Body		C6orf81
cg18565473	None	11	128392102	Body;5'UTR;1stExon;5'UTR;1stExon	Island	ETS1;ETS1;ETS1;ETS1;ETS1
cg03699623	None	2	121200515		Island
cg26989316	None	11	68607257	5'UTR;5'UTR	Island	CPT1A;CPT1A
cg09230154	None	1	39835806	Body;Body		MACF1;MACF1
cg06642177	None	6	134496341	Body;Body;Body;TSS1500	Island	SGK1;SGK1;SGK1;SGK1
cg07860213	None	8	70982039	Body	Island	PRDM14
cg07786668	None	16	73092391	5'UTR	Island	ZFHX3
cg20450979	None	4	176923542	5'UTR;5'UTR;1stExon;1stExon	Island	GPM6A;GPM6A;GPM6A;GPM6A
cg11580676	None	1	156211415	TSS1500	N_Shelf	BGLAP
cg21160472	None	1	212782112	1stExon;5'UTR;1stExon;5'UTR;5'UTR	Island	ATF3;ATF3;ATF3;ATF3;ATF3
cg00177496	None	3	197283127	TSS1500;TSS1500;5'UTR	Island	BDH1;BDH1;BDH1
cg07476508	None	11	111783355	TSS1500;TSS200		CRYAB;HSPB2
cg23951474	None	11	2188061	Body;Body;Body	Island	TH;TH;TH
cg03038685	None	3	197281468	5'UTR;5'UTR;5'UTR	N_Shore	BDH1;BDH1;BDH1
cg12176793	None	8	90624127
cg08775137	None	4	41880319		Island
cg26260369	None	14	68141723	TSS200	Island	VTI1B
cg26295057	None	5	37839829	TSS200	Island	GDNF
cg03291336	None	15	69114244	TSS1500	S_Shore	ANP32A
cg07204280	None	18	12254551	Body;TSS200	Island	CIDEA;CIDEA
cg21574675	None	19	45656942	Body	Island	NKPD1
cg04883026	None	11	66487938	Body		SPTBN2
cg21059834	None	4	41884631		S_Shore
cg26638069	None	2	218801403	5'UTR		TNS1
cg04226724	None	1	82268649	5'UTR	Island	LPHN2
cg03270395	None	6	111888620	Body;Body;Body;TSS200;Body		TRAF3IP2;TRAF3IP2;TRAF3IP2;TRAF3IP2;TRAF3IP2
cg16596102	None	1	166134346	Body	Island	FAM78B
cg15856275	None	20	2539795	Body	Island	TMC2
cg02656891	None	1	34642519	5'UTR;TSS200	Island	C1orf94;C1orf94
cg02443967	None	10	98129902	Body		TLL2
cg22830113	None	2	127783168		Island
cg00832644	None	1	162343785	3'UTR		C1orf111
cg01896926	None	17	685509	5'UTR;1stExon;TSS200	Island	GLOD4;GLOD4;RNMTL1
cg07928086	None	1	5907446
cg24449302	local	15	66679100	TSS200	Island	MAP2K1
cg16414403	local	20	35399314	Body;Body;Body;Body;Body	N_Shelf	DSN1;DSN1;DSN1;DSN1;DSN1
cg16261348	local	14	20785781	5'UTR;5'UTR;5'UTR;5'UTR		CCNB1IP1;CCNB1IP1;CCNB1IP1;CCNB1IP1
cg04743638	local	11	62766534	Body		SLC22A8
cg17290332	local	10	14880008	TSS200;TSS1500	Island	CDNF;HSPA14
cg24635581	local	6	33389846	Body	N_Shelf	SYNGAP1
cg26158980	local	11	3692187	Body	S_Shelf	CHRNA10
cg05784951	local	17	80968162	Body	N_Shore	B3GNTL1
cg18144404	local	5	159247072
cg06678662	local	12	63023439		N_Shelf
cg26144207	local	21	45113973	3'UTR	Island	RRP1B
cg20220755	local	7	142012034
cg03221247	local	1	219347458	Body	Island	LYPLAL1
cg08539991	local	19	36203832	5'UTR;1stExon	N_Shelf	ZBTB32;ZBTB32
cg11477010	local	17	4079262	Body		ANKFY1
cg10134496	local	6	151671694	Body;Body		AKAP12;AKAP12
cg14817765	local	20	2444494	TSS1500;Body;Body		SNORD119;SNRPB;SNRPB
cg04494562	local	13	101173774	Body;Body		PCCA;PCCA
cg17524854	local	12	67663046	TSS200	Island	CAND1
cg15335334	local	17	73642547	Body;TSS200		RECQL5;LOC100130933
cg09225701	local	4	8248877
cg16580289	local	6	90025307	TSS1500		GABRR2
cg17137307	local	2	85363490	Body	S_Shore	TCF7L1
cg07353895	local	15	90611758	Body	S_Shore	ZNF710
cg24725263	local	12	56101328	1stExon;Body;1stExon	Island	ITGA7;ITGA7;ITGA7
cg13445258	local	3	128369860	TSS200	S_Shore	RPN1
cg17038056	local	10	120796751	Body		EIF3A
cg06500654	local	7	42277347	TSS1500	Island	GLI3
cg10318725	local	13	114786904	Body	S_Shore	RASA3
cg21757440	local	16	58031050	Body	Island	ZNF319
cg07380334	local	19	55789002	Body;Body	N_Shore	HSPBP1;HSPBP1
cg01134608	local	4	26177418
cg14668632	local	7	2872130	Body		GNA12
cg23119463	local	10	134592391	Body	N_Shore	INPP5A
cg12434312	local	10	129845509	Body;TSS1500		PTPRE;PTPRE
cg10069238	local	5	14488532	Body	Island	TRIO
cg03790189	local	16	89977815		Island
cg23018755	local	17	79881529	5'UTR;TSS200	S_Shore	MAFG;MAFG
cg05370881	local	12	124821020	Body;Body	Island	NCOR2;NCOR2
cg00906926	local	12	113591276	Body	Island	CCDC42B
cg25053002	local	10	3142765	Body	N_Shelf	PFKP
cg14288890	local	12	132901741	Body	S_Shore	GALNT9
cg16887170	local	17	19451180	Body		SLC47A1
cg10970045	local	2	11775827	Body	S_Shore	GREB1
cg04706556	local	7	26526094	Body		LOC441204
cg07991675	local	22	36697055	Body		MYH9
cg00779328	local	1	33745989	Body	Island	ZNF362
cg05924733	local	4	160277162	Body		RAPGEF2
cg08734931	local	10	14051649	Body		FRMD4A
cg16417028	local	1	207070825	1stExon;5'UTR;1stExon;5'UTR		IL24;IL24;IL24;IL24
cg17786661	local	10	686080	Body	Island	DIP2C
cg01281140	local	7	150065678	TSS200;TSS200;TSS200	Island	REPIN1;REPIN1;REPIN1
cg19498147	local	6	31598777	Body	N_Shore	BAT2
cg18629132	local	10	131592435		Island
cg02254581	local	11	68682369	Body		IGHMBP2
cg06391451	local	6	160523655	Body		IGF2R
cg11678773	local	6	31619875	5'UTR;5'UTR;5'UTR;5'UTR	Island	BAT3;BAT3;BAT3;BAT3
cg21003465	local	20	57594082	TSS1500		TUBB1
cg06902558	local	10	3141803	Body		PFKP
cg02776628	local	6	37465322	Body	N_Shelf	C6orf129
cg18601714	local	17	25485531
cg14210001	local	12	124601493
cg08491125	local	15	89181942	TSS200		ISG20
cg06297857	local	16	58191928	3'UTR		CSNK2A2
cg23208881	local	15	91411495	TSS1500	N_Shelf	FURIN
cg09241455	local	4	37667583	Body;Body		RELL1;RELL1
cg05892156	local	18	8658686		N_Shore
cg06856155	local	2	11774852	Body	S_Shore	GREB1
cg17705681	local	14	100759438	Body	Island	SLC25A29
cg20638016	local	11	122852694	TSS1500	Island	BSX
cg14041100	local	8	61591939	5'UTR	Island	CHD7
cg17089511	local	4	2438721
cg22502502	local	6	25962567	TSS1500		TRIM38
cg00785856	local	15	59041883	1stExon;5'UTR	Island	ADAM10;ADAM10
cg00625021	local	5	75013185	5'UTR;1stExon	Island	C5orf37;C5orf37
cg05404698	local	6	28956247		Island
cg06031301	local	16	81818852	5'UTR		PLCG2
cg01724683	local	17	75180961	Body;Body;TSS1500;Body;Body		SEC14L1;SEC14L1;SEC14L1;SEC14L1;SEC14L1
cg20020057	local	13	46287719	Body	Island	SPERT
cg01111558	local	17	423281	Body		VPS53
cg27585557	local	2	121035773	5'UTR		RALB
cg26080545	local	10	15174924	Body		NMT2
cg16711857	local	14	45356185		N_Shore
cg01726103	local	6	24911615	TSS1500	S_Shore	FAM65B
cg25282285	local	6	111888652	Body;Body;Body;TSS200;Body		TRAF3IP2;TRAF3IP2;TRAF3IP2;TRAF3IP2;TRAF3IP2
cg25801622	local	12	123596413	TSS1500		PITPNM2
cg16560077	local	16	3781408	Body;Body	Island	CREBBP;CREBBP
cg09415386	local	1	29445461	3'UTR;3'UTR;3'UTR;3'UTR;3'UTR	N_Shelf	EPB41;EPB41;EPB41;EPB41;EPB41
cg04485603	local	4	56376410	5'UTR		CLOCK
cg00007324	local	19	4047803	Body	Island	ZBTB7A
cg03216043	local	19	10928639	Body;TSS1500;Body;Body;Body		DNM2;MIR199A1;DNM2;DNM2;DNM2
cg09681977	local	2	240153103	Body	N_Shore	HDAC4
cg22618215	local	3	62354489		Island
cg19439022	local	20	34330364	TSS200;TSS200	Island	RBM39;RBM39
cg06921549	local	19	13009961	Body;3'UTR;Body		GCDH;SYCE2;GCDH
cg24016448	local	3	11607988	Body;Body;Body;Body	N_Shelf	VGLL4;VGLL4;VGLL4;VGLL4
cg20003368	local	6	44026475
cg09503202	local	15	29927471
cg06533788	local	2	240312860	5'UTR		HDAC4
cg23628684	local	21	30446052	TSS200	Island	CCT8
cg24634333	local	6	111887834	Body;5'UTR;Body;Body;Body		TRAF3IP2;TRAF3IP2;TRAF3IP2;TRAF3IP2;TRAF3IP2
cg17823430	local	2	3293358	Body	S_Shore	TSSC1
cg15447479	local	7	128828765	5'UTR;1stExon	Island	SMO;SMO
cg14917395	local	11	123300849		N_Shore
cg01082498	local	11	68608225	5'UTR;5'UTR	Island	CPT1A;CPT1A
cg23752152	local	17	76454652	Body	N_Shore	DNAH17
cg00293191	local	16	73126120	TSS200		HTA
cg05170759	local	2	3285048	Body	N_Shore	TSSC1
cg19979314	local	15	22991163	Body;Body		CYFIP1;CYFIP1
cg02708922	local	2	3502790	Body	N_Shore	ADI1
cg01988550	local	7	28966659
cg09290082	local	12	93129809	TSS1500		PLEKHG7
cg01982597	local	10	50733420	Body;TSS1500		ERCC6;PGBD3
cg01951459	local	2	236964187	Body;Body		AGAP1;AGAP1
cg26046953	local	17	55752388	Body		MSI2
cg18207590	local	10	3419897
cg13057055	local	17	36572011		N_Shelf
cg16825643	local	16	88802743	Body	N_Shore	FAM38A
cg12146447	local	17	47926239	TSS1500;TSS1500;TSS1500;TSS1500;TSS1500	N_Shelf	TAC4;TAC4;TAC4;TAC4;TAC4
cg05121182	local	3	123812381	TSS1500;TSS1500;TSS1500		KALRN;KALRN;KALRN
cg14173815	local	17	27049557	Body;TSS1500;TSS1500;TSS200	N_Shelf	RPL23A;SNORD42A;SNORD4B;SNORD4A
cg07217653	local	15	101591436	Body	N_Shelf	LRRK1
cg03191565	local	19	47987374	1stExon	Island	KPTN
cg01602345	local	1	3277525	Body;Body	S_Shelf	PRDM16;PRDM16
cg03219831	local	4	57875130	Body		POLR2B
cg20534884	local	5	126429201
cg04122657	local	16	4014295	3'UTR	N_Shore	ADCY9
cg22747480	local	10	1166867	Body		WDR37
cg10924857	local	17	20013829	Body;Body		CYTSB;CYTSB
cg10224581	local	13	114742421		N_Shore
cg15673491	local	6	30885481	Body;Body;Body	S_Shelf	VARS2;VARS2;VARS2
cg04005701	local	17	1733641	Body;TSS1500	S_Shore	RPA1;SMYD4
cg26362368	local	1	10675623	Body		PEX14
cg15630827	local	13	69558928		Island
cg05423257	local	2	233321600	Body	N_Shore	ALPI
cg00900735	local	17	73316505	Body;Body		GRB2;GRB2
cg09150647	local	3	122604779	TSS1500		LOC100129550
cg24191821	local	11	73008025	Body;Body;Body;Body		P2RY6;P2RY6;P2RY6;P2RY6
cg08069310	local	16	71748860	TSS200		PHLPP2
cg19057227	local	2	3479762	Body		TTC15
cg08049136	local	19	10765744	5'UTR;5'UTR;5'UTR;TSS1500;5'UTR;5'UTR	Island	ILF3;ILF3;ILF3;LOC147727;ILF3;ILF3
cg12262069	local	3	5028410		Island
cg14792180	local	5	10632056	Body		ANKRD33B
cg19910568	local	10	22048295	Body		DNAJC1
cg00303183	local	2	162283559		N_Shore
cg12449813	local	15	69853608	TSS1500		LOC145837
cg10929758	local	2	54857270	Body;Body	S_Shore	SPTBN1;SPTBN1
cg12640817	local	17	80790958	Body;5'UTR	S_Shore	TBCD;ZNF750
cg06949933	local	2	61406491	5'UTR	S_Shore	AHSA2
cg25439496	local	6	85484627		Island
cg25659923	local	10	134300380		N_Shelf
cg24704562	local	21	37692775	Body	Island	MORC3
cg23919795	local	17	685151	TSS1500;Body	Island	RNMTL1;GLOD4
cg06709756	local	8	1339049		N_Shelf
cg02171859	local	7	853441		N_Shore
cg25323360	local	13	111935681	Body;Body;Body;Body;Body	Island	ARHGEF7;ARHGEF7;ARHGEF7;ARHGEF7;ARHGEF7
cg26690592	local	11	19261879	5'UTR	N_Shore	E2F8
cg12519236	local	2	241440223	Body;Body		ANKMY1;ANKMY1
cg20557069	local	21	47646604	Body;Body;Body;Body	N_Shore	LSS;LSS;LSS;LSS
cg23966361	local	17	80006606	Body	N_Shore	RFNG
cg09904091	local	16	85195282		N_Shore
cg09311052	local	1	154531418	TSS1500	Island	UBE2Q1
cg05637265	local	8	144884124	Body;Body	N_Shore	SCRIB;SCRIB
cg25763212	local	1	207039833	Body		IL20
cg02494945	local	17	59535723	Body	S_Shore	TBX4
cg20650683	local	7	98552764	Body	Island	TRRAP
cg16925090	local	11	101785516	TSS1500;5'UTR	N_Shore	KIAA1377;ANGPTL5
cg22617002	local	13	112275633		Island
cg02217184	local	13	99907419	Body;Body;Body;Body;Body		GPR18;GPR18;UBAC2;UBAC2;UBAC2
cg00848167	local	15	89921898	Body	Island	LOC254559
cg21454925	local	18	8784363	Body	Island	KIAA0802
cg21417130	local	1	19400922
cg06596654	local	16	86527923		N_Shore
cg23702610	local	15	100017287
cg15887459	local	11	18230903	Body;Body;Body	Island	LOC494141;LOC494141;LOC494141
cg24749672	local	12	51718108	TSS200		BIN2
cg06326667	local	10	133950900	Body	N_Shore	JAKMIP3
cg16680125	local	1	206782805	Body	N_Shelf	LGTN
cg12178465	local	12	57405251	3'UTR		TAC3
cg25338242	local	13	114786047	Body	N_Shore	RASA3
cg04439028	local	16	3722002	Body	N_Shelf	TRAP1
cg16953006	local	2	201857		S_Shelf
cg06155303	local	1	29460817		Island
cg00650809	local	19	17439339	Body	Island	ANO8
cg26260386	local	4	140477698	TSS200	Island	SETD7
cg01026898	local	11	44995262	TSS200		LOC221122
cg24719575	local	4	57773768	TSS1500	N_Shore	REST
cg14654468	local	17	80186336	TSS1500;5'UTR;1stExon	Island	SLC16A3;SLC16A3;SLC16A3
cg05224827	local	14	50999389	TSS200;TSS1500;TSS200	Island	MAP4K5;ATL1;MAP4K5
cg24125890	local	12	21654287	1stExon;TSS1500;5'UTR;5'UTR	N_Shore	RECQL;GOLT1B;RECQL;RECQL
cg12944530	local	2	201982310	5'UTR;TSS1500;5'UTR	N_Shore	CFLAR;CFLAR;CFLAR
cg13756273	local	20	57594513	5'UTR;1stExon		TUBB1;TUBB1
cg05060880	local	2	66802180		N_Shore
cg25049295	local	2	131116527	Body;Body	S_Shelf	PTPN18;PTPN18
cg05887405	local	16	83982436	TSS1500;TSS1500		OSGIN1;OSGIN1
cg27026202	local	2	235200560
cg01682917	local	13	114865944	Body	N_Shelf	RASA3
cg05341549	local	1	9774742	Body	N_Shore	PIK3CD
cg06798657	local	16	89170207	Body;Body;Body	N_Shelf	ACSF3;ACSF3;ACSF3
cg15121053	local	7	138818439	TSS200;TSS200;TSS200	Island	TTC26;TTC26;TTC26
cg24454243	local	7	105221985	TSS200	N_Shore	EFCAB10
cg06677690	local	4	2302953	Body	N_Shelf	ZFYVE28
cg02879081	local	14	102500684	Body		DYNC1H1
cg04358037	local	10	127465013	TSS1500	S_Shore	MMP21
cg27607092	local	5	171522629	Body		STK10
cg04229238	local	8	53627628	TSS1500;TSS1500	S_Shore	RB1CC1;RB1CC1
cg24528693	local	7	2041372	Body;Body;Body	N_Shelf	MAD1L1;MAD1L1;MAD1L1
cg09478597	local	8	37594596	5'UTR;5'UTR;5'UTR	Island	ERLIN2;ERLIN2;ERLIN2
cg03534948	local	12	3281841	5'UTR;5'UTR		TSPAN9;TSPAN9
cg19828537	local	2	97563889	Body;TSS200		FAM178B;FAM178B
cg03983647	local	5	31194330	5'UTR	Island	CDH6
cg06631310	local	12	58013324	TSS1500	Island	SLC26A10
cg25841114	local	6	31762901	Body	N_Shore	VARS
cg17927223	local	19	3750813	3'UTR	N_Shore	APBA3
cg02655864	local	17	685375	TSS200;Body	Island	RNMTL1;GLOD4
cg14436231	local	17	3563641	Body;Body		CTNS;CTNS
cg04736453	local	16	22205090		S_Shelf
cg06187770	local	6	85484863		S_Shore
cg09336942	local	16	8988917	Body		USP7
cg21898046	local	5	180231026	5'UTR;TSS200;TSS1500;5'UTR;TSS200	S_Shore	MGAT1;MGAT1;MGAT1;MGAT1;MGAT1
cg25114142	local	2	46896868
cg01802953	local	1	173887360	TSS1500		SERPINC1
cg27614445	local	3	179041226	TSS1500	Island	ZNF639
cg00395951	local	3	113413263	5'UTR	N_Shore	KIAA2018
cg01170247	local	10	134528551	Body	S_Shore	INPP5A
cg15538418	local	17	73776120	TSS1500	S_Shore	H3F3B
cg15549931	local	6	30710788	TSS1500	Island	FLOT1
cg03800721	local	12	120525338	Body	S_Shore	CCDC64
cg06745704	local	1	27668325	TSS200		SYTL1
cg04206484	local	7	1121657	Body;Body;Body	S_Shore	C7orf50;C7orf50;C7orf50
cg18069290	local	12	58013539	TSS200	Island	SLC26A10
cg02152290	local	7	551601	Body;Body	S_Shore	PDGFA;PDGFA
cg15014069	local	17	80540666	Body	N_Shore	FOXK2
cg17428922	local	6	30885344	Body;Body;Body	S_Shelf	VARS2;VARS2;VARS2
cg19205498	local	12	133431064	Body;Body;Body;Body;Body	S_Shore	CHFR;CHFR;CHFR;CHFR;CHFR
cg15513620	local	1	120174873	5'UTR		ZNF697
cg00669044	local	8	23389128	Body	S_Shore	SLC25A37
cg15757853	local	18	20718301	Body;Body	S_Shore	CABLES1;CABLES1
cg01316071	local	14	95876996	TSS1500		C14orf139
cg20007890	local	10	468755	Body	S_Shelf	DIP2C
cg01029623	local	12	122016779	Body;Body	Island	KDM2B;KDM2B
cg10110506	local	1	206764266
cg12790592	local	14	89884273	TSS1500;5'UTR	Island	FOXN3;FOXN3
cg18432768	local	17	68100565	5'UTR;TSS1500;5'UTR		KCNJ16;KCNJ16;KCNJ16
cg11935055	local	19	4483577	Body;Body	Island	HDGF2;HDGF2
cg23323879	local	15	65504534	TSS1500		CILP
cg22129135	local	1	5951943	Body	S_Shore	NPHP4
cg17888086	local	1	37945057	Body		ZC3H12A
cg01669948	local	6	39290877	TSS1500;TSS1500;TSS1500;TSS1500		KCNK16;KCNK16;KCNK16;KCNK16
cg24304050	local	1	11107870	TSS1500;TSS1500		MASP2;MASP2
cg08611376	local	8	135610198	Body;Body;3'UTR;TSS200		ZFAT;ZFAT;ZFAT;ZFATAS
cg04881814	local	17	50236572	TSS1500;5'UTR;5'UTR	S_Shore	CA10;CA10;CA10
cg02912129	local	20	57615494	Body	N_Shore	SLMO2
cg16973107	local	12	57828180	TSS1500	S_Shelf	INHBC
cg10406360	local	10	134529052	Body	S_Shore	INPP5A
cg25869317	local	15	101792241	TSS200	Island	CHSY1
cg00184376	local	13	28499045	3'UTR	Island	PDX1
cg00260803	local	16	2107101	Body;Body;Body	S_Shore	TSC2;TSC2;TSC2
cg18492208	local	14	102053207		N_Shore
cg08043200	local	14	105181902	Body;3'UTR	S_Shore	INF2;INF2
cg07730183	local	16	2136400	Body;Body;Body	S_Shore	TSC2;TSC2;TSC2
cg12320621	local	10	126257033	Body;Body		LHPP;LHPP
cg27485730	local	22	46857675	Body	N_Shore	CELSR1
cg03568017	local	17	75315503	5'UTR;TSS200;Body		SEPT9;SEPT9;SEPT9
cg15164472	local	3	195914113
cg19355932	local	18	76151203		Island
cg03366925	local	7	42277410	TSS1500	Island	GLI3
cg21023831	local	2	218769784	5'UTR		TNS1
cg24637252	local	15	71402902	3'UTR		CT62
cg03283421	local	10	124610984	5'UTR		FAM24B
cg04406115	local	19	5065640	Body	Island	KDM4B
cg22521118	local	12	50794552	TSS200;TSS200;TSS200;TSS200;TSS200;TSS200;TSS200	Island	LARP4;LARP4;LARP4;LARP4;LARP4;LARP4;LARP4
cg00057393	local	15	96897796		Island
cg09251291	local	15	63483946	Body	S_Shore	RAB8B
cg14326991	local	6	46889760	TSS200;5'UTR		GPR116;GPR116
cg02272667	local	7	1922866	Body;Body;Body		MAD1L1;MAD1L1;MAD1L1
cg24936095	local	2	109204230	TSS1500		LIMS1
cg17311022	local	3	119379792	TSS1500		POPDC2
cg02011476	local	11	68140196	Body		LRP5
cg15101980	local	5	149681950	5'UTR;1stExon	Island	ARSI;ARSI
cg10331528	local	12	122266596	Body	S_Shore	SETD1B
cg22979083	local	8	142367795	Body	Island	GPR20
cg21445527	local	4	737453	Body	N_Shore	PCGF3
cg01254505	local	19	17516470	TSS200		BST2
cg02232751	local	11	18415742	TSS200;TSS200;TSS200;TSS200;TSS200	N_Shore	LDHA;LDHA;LDHA;LDHA;LDHA
cg11850468	local	5	180231185	TSS1500;5'UTR;TSS1500;5'UTR;TSS1500	S_Shore	MGAT1;MGAT1;MGAT1;MGAT1;MGAT1
cg06952671	local	2	182322268	5'UTR;1stExon	Island	ITGA4;ITGA4
cg09657256	local	17	42153683	Body;Body;3'UTR		G6PC3;G6PC3;G6PC3
cg12449682	local	5	175111543	Body;3'UTR;1stExon		HRH2;HRH2;HRH2
cg27233847	local	10	698258	Body;Body;Body		DIP2C;C10orf108;C10orf108
cg24003866	local	4	184938470	3'UTR		STOX2
cg16755922	local	17	80536214	Body	S_Shelf	FOXK2
cg10176258	local	16	88826429	Body		FAM38A
cg05637092	local	7	610887	Body;Body;Body;Body;Body;Body	Island	PRKAR1B;PRKAR1B;PRKAR1B;PRKAR1B;PRKAR1B;PRKAR1B
cg25339368	local	17	80819400	Body	S_Shore	TBCD
cg18120825	local	2	3284161	Body	N_Shelf	TSSC1
cg06666157	local	19	4791552	TSS200	Island	FEM1A
cg26240231	local	7	1148101	Body;Body;Body	N_Shore	C7orf50;C7orf50;C7orf50
cg01519350	local	3	137906342	1stExon;5'UTR;1stExon;5'UTR;5'UTR;1stExon	Island	ARMC8;ARMC8;ARMC8;ARMC8;ARMC8;ARMC8
cg16166968	local	1	120439036	1stExon;5'UTR	Island	ADAM30;ADAM30
cg01086672	local	6	31123044	Body;Body;Body	N_Shelf	CCHCR1;CCHCR1;CCHCR1
cg07269567	local	6	30886161	Body;Body;Body	S_Shelf	VARS2;VARS2;VARS2
cg00522588	local	12	49449063	1stExon		MLL2
cg08872483	local	9	96213189	Body;TSS1500	N_Shore	FAM120AOS;FAM120A
cg09752223	local	19	15281200	Body	Island	NOTCH3
cg22358291	local	4	10101553	Body;Body		WDR1;WDR1
cg02668984	local	17	48172022	TSS1500	N_Shore	PDK2
cg19484420	local	2	127414108	Body;Body	Island	GYPC;GYPC
cg21227771	local	13	22392996
cg23436918	local	7	16685595	TSS200;TSS200;TSS200;TSS200	Island	BZW2;ANKMY2;BZW2;BZW2
cg09392499	local	2	65250623	3'UTR;3'UTR		SLC1A4;SLC1A4
cg00117914	local	22	50479197	Body		TTLL8
cg27030081	local	8	103573117	3'UTR		ODF1
cg15629235	local	13	111330699	Body	N_Shore	CARS2
cg17706173	local	16	1582581	Body	N_Shore	IFT140
cg14040633	local	17	73996331	TSS1500;Body		CDK3;C17orf106
cg20578612	local	7	142020376
cg15467646	local	1	22141014	Body	Island	LDLRAD2
cg00070460	local	4	1227676	Body;Body	N_Shore	CTBP1;CTBP1
cg05713044	local	5	16671496	Body		MYO10
cg00499245	local	10	411799	Body	N_Shelf	DIP2C
cg22257336	local	11	57191665	Body;Body;Body	N_Shelf	SLC43A3;SLC43A3;SLC43A3
cg18137036	local	14	89672409	Body;Body		FOXN3;FOXN3
cg17093995	local	7	49815502	Body	Island	VWC2
cg06766273	local	11	62521983	TSS1500	S_Shore	ZBTB3
cg02011351	local	1	110612375	Body	Island	ALX3
cg27302576	local	15	32964759	Body;Body		SCG5;SCG5
cg03383268	local	2	218770237	5'UTR		TNS1
cg24618387	local	13	114917640		S_Shelf
cg17241841	local	15	89158993
cg01506766	local	13	46626746	5'UTR	Island	ZC3H13
cg22029985	local	1	44085062	Body;Body		PTPRF;PTPRF
cg06913958	local	1	85744641	TSS1500	S_Shelf	BCL10
cg18528593	local	19	3381526	Body;Body	Island	NFIC;NFIC
cg06793798	local	10	62538126	TSS200;TSS200;5'UTR;1stExon;TSS200;TSS200	Island	CDK1;CDC2;CDK1;CDK1;CDK1;CDK1
cg05768419	local	1	174417967	1stExon;Body		GPR52;RABGAP1L
cg06816718	local	14	93151448	Body	N_Shore	RIN3
cg12243262	local	3	194832929	Body		C3orf21
cg03517614	local	16	88111522		S_Shore
cg21725496	local	7	5372402	Body	Island	TNRC18
cg17010118	local	2	219255879	Body	N_Shore	SLC11A1
cg22968445	local	12	42538818	TSS200;TSS200	Island	GXYLT1;GXYLT1
cg23475278	local	4	128651543	TSS200	Island	SLC25A31
cg17816173	local	7	158377440	Body;Body;Body	N_Shore	PTPRN2;PTPRN2;PTPRN2
cg27662875	local	19	50165232	Body	N_Shelf	IRF3
cg02614932	local	10	349042	Body	S_Shelf	DIP2C
cg14077232	local	9	140656200	Body;TSS1500;Body		EHMT1;FLJ40292;EHMT1
cg05243095	local	18	3262534	5'UTR;5'UTR;TSS200;TSS200	Island	MYL12B;MYL12B;MYL12B;MYL12B
cg13705888	local	6	32131722	TSS1500	N_Shelf	EGFL8
cg26561844	local	12	132562101	Body		EP400
cg07031083	local	16	87391861	Body;Body		FBXO31;FBXO31
cg12931625	local	4	25235765	1stExon;5'UTR	Island	PI4K2B;PI4K2B
cg17945323	local	11	62767406	Body		SLC22A8
cg13800349	local	17	80971527	Body	S_Shore	B3GNTL1
cg15480830	local	19	44439673		S_Shore
cg14531663	local	6	32116933	3'UTR	Island	PRRT1
cg08810419	local	16	84696447		S_Shore
cg16595484	local	3	122512170	Body	N_Shore	HSPBAP1
cg00743929	local	3	50375535	TSS1500;Body;Body;5'UTR	Island	RASSF1;RASSF1;RASSF1;RASSF1
cg04720116	local	10	679221	Body	Island	DIP2C
cg22467534	local	17	73841658	TSS1500		UNC13D
cg20027784	local	11	1520631	Body		HCCA2
cg06607620	local	2	120438837	Body;Body;Body	S_Shore	TMEM177;TMEM177;TMEM177
cg13526488	local	17	78793807	Body;Body	N_Shelf	RPTOR;RPTOR
cg11688874	local	10	28822482	1stExon;5'UTR;1stExon;5'UTR;Body	Island	WAC;WAC;WAC;WAC;WAC
cg01635736	local	12	132902607	Body	S_Shore	GALNT9
cg00361609	local	5	170881793	Body	N_Shore	FGF18
cg04383154	local	17	80968667	Body	N_Shore	B3GNTL1
cg21226491	local	13	114786451	Body	Island	RASA3
cg26889437	local	11	460914	Body	S_Shore	PTDSS2
cg10594837	local	8	142190855	Body		DENND3
cg08287211	local	10	134535631	Body	N_Shore	INPP5A
cg18638914	local	4	779568	3'UTR	Island	CPLX1
cg06554062	local	19	19517612	5'UTR	S_Shore	GATAD2A
cg02915215	local	8	134467165	3'UTR;3'UTR		ST3GAL1;ST3GAL1
cg02337897	local	8	144459842	Body	N_Shelf	RHPN1
cg01538821	local	8	85096835	5'UTR;TSS1500;5'UTR;5'UTR	Island	RALYL;RALYL;RALYL;RALYL
cg07698804	local	17	80829309	Body	N_Shore	TBCD
cg23118464	local	2	100721844	5'UTR;5'UTR	S_Shore	AFF3;AFF3
cg03748259	local	19	11773378		Island
cg24051818	local	1	55107918	Body;5'UTR		C1orf175;C1orf175
cg13708635	local	20	36149656	5'UTR;1stExon;5'UTR;1stExon;5'UTR;5'UTR;5'UTR;5'UTR;5'UTR	Island	NNAT;NNAT;BLCAP;NNAT;BLCAP;NNAT;BLCAP;BLCAP;BLCAP
cg14397500	local	7	2214759	Body;Body;Body		MAD1L1;MAD1L1;MAD1L1
cg24726553	local	14	103431560	Body	S_Shore	CDC42BPB
cg11968071	local	1	32181323		S_Shore
cg22997040	local	8	123875223	5'UTR		ZHX2
cg25506059	local	17	80872065	Body	S_Shore	TBCD
cg19858334	local	1	85220942		S_Shore
cg25678150	local	13	113488452	Body;Body	S_Shore	ATP11A;ATP11A
cg05237640	local	16	73265382
cg07738938	local	7	5372608	Body	Island	TNRC18
cg11611505	local	10	3373478		N_Shore
cg09129839	local	1	2304315	Body	Island	MORN1
cg13553662	local	8	876130
cg27355739	local	6	131383432	5'UTR;5'UTR;5'UTR	Island	EPB41L2;EPB41L2;EPB41L2
cg19242568	local	7	149420655	Body	S_Shelf	KRBA1
cg27341866	local	19	2278618	Body	Island	C19orf35
cg09300604	local	13	114111962	3'UTR		DCUN1D2
cg05917748	local	15	93139515
cg20750319	local	7	625089	Body;Body;Body;Body;Body;Body		PRKAR1B;PRKAR1B;PRKAR1B;PRKAR1B;PRKAR1B;PRKAR1B
cg10953487	local	6	44529157
cg17934365	local	17	75180216	Body;Body;TSS1500;Body;Body		SEC14L1;SEC14L1;SEC14L1;SEC14L1;SEC14L1
cg05590196	local	1	33220274	Body	S_Shore	KIAA1522
cg08430355	local	20	47894490	TSS1500;TSS1500;TSS1500;5'UTR;TSS1500	Island	C20orf199;SNORD12C;C20orf199;ZNFX1;C20orf199
cg16536330	global	8	29957344	Body;Body	S_Shelf	LEPROTL1;LEPROTL1
cg11963365	global	5	141320784	3'UTR;3'UTR		KIAA0141;KIAA0141
cg23910340	global	12	58287143		N_Shelf
cg03235119	global	5	176449645	TSS200	Island	ZNF346
cg09193347	global	15	79381867	Body;Body	Island	RASGRF1;RASGRF1
cg14475758	global	6	32920880	5'UTR;1stExon		HLA-DMA;HLA-DMA
cg23912429	global	10	17270431	5'UTR;1stExon	Island	VIM;VIM
cg26239485	global	2	236514213	Body;Body		AGAP1;AGAP1
cg19310148	global	7	26196274	Body	S_Shelf	NFE2L3
cg19610529	global	14	61108807		N_Shore
cg23437733	global	5	178017571	TSS200	Island	COL23A1
cg07830160	global	1	159880327
cg02285386	global	22	35695157	TSS1500;TSS1500;TSS1500;TSS200;TSS1500;TSS1500	N_Shore	TOM1;TOM1;TOM1;TOM1;TOM1;TOM1
cg14856585	global	14	94425764
cg17178220	global	1	172114068	Body;Body;TSS1500		DNM3;DNM3;MIR199A2
cg00060649	global	12	67928800
cg00071360	global	20	37350793		N_Shore
cg01778994	global	8	134511683	5'UTR;5'UTR		ST3GAL1;ST3GAL1
cg19351954	global	7	156259207
cg01013171	global	14	75716369
cg22731637	global	11	45231545	Body	N_Shelf	PRDM11
cg26249450	global	6	36355732	TSS1500	Island	ETV7
cg19008088	global	10	102890038	TSS1500;5'UTR	N_Shore	TLX1;TLX1NB
cg23368159	global	6	170768731		S_Shelf
cg04658841	global	16	85478651
cg09068286	global	5	179779115	Body	Island	GFPT2
cg09319061	global	12	109128198		S_Shelf
cg08046512	global	17	72450493		Island
cg08239858	global	5	2739131		Island
cg09996344	global	7	66093369	TSS1500;TSS1500	Island	KCTD7;KCTD7
cg07455757	global	16	54968985		N_Shore
cg24049880	global	1	161171211	5'UTR;TSS1500	N_Shore	NDUFS2;NDUFS2
cg01741626	global	16	4364093		Island
cg21243944	global	9	137118148
cg17760043	global	4	126279846	Body		FAT4
cg09428349	global	21	43346858	Body;TSS200		C2CD2;C2CD2
cg25250013	global	19	11302225	Body;Body	N_Shore	KANK2;KANK2
cg18310639	global	1	223904225	Body;Body	S_Shelf	CAPN2;CAPN2
cg01301803	global	10	134143535		N_Shore
cg13359998	global	1	230241764	Body		GALNT2
cg14845091	global	13	114107956	TSS200		ADPRHL1
cg12424646	global	8	37699507	Body	Island	GPR124
cg26211060	global	12	3345821	Body;Body		TSPAN9;TSPAN9
cg19734222	global	7	142020183
cg06747543	global	19	18589894	Body		ELL
cg02861178	global	20	10492319	Body		C20orf94
cg22243733	global	11	7506434	TSS200		OLFML1
cg22776912	global	15	81630789	Body		TMC3
cg21335378	global	2	173150101
cg07120889	global	1	150535935		S_Shore
cg12017558	global	7	2289097	Body;Body;Body;Body;Body;Body;Body		NUDT1;NUDT1;NUDT1;NUDT1;NUDT1;NUDT1;NUDT1
cg00237391	global	6	35265643	1stExon		DEF6
cg05374412	global	16	82660727	1stExon	Island	CDH13
cg01883425	global	6	41606770	Body	N_Shore	MDFI
cg07744430	global	12	132345502
cg01645729	global	2	131582240
cg18631996	global	5	139526080		Island
cg02101812	global	1	33447089
cg10397932	global	1	2166155	Body		SKI
cg18358723	global	5	87955618	Body	N_Shore	LOC645323
cg17888086	global	1	37945057	Body		ZC3H12A
cg20873416	global	6	30737068
cg02257405	global	5	131346985	Body;Body	Island	ACSL6;ACSL6
cg00068038	global	2	36688564	Body		CRIM1
cg01986630	global	16	53946263	Body		FTO
cg10739556	global	7	27192056		S_Shore
cg05261851	global	16	68001206	Body;Body;Body;TSS1500	N_Shore	SLC12A4;SLC12A4;SLC12A4;SLC12A4
cg22689909	global	5	95159365	TSS1500;TSS1500		GLRX;GLRX
cg05515072	global	11	45231326	Body	N_Shelf	PRDM11
cg16694480	global	1	19732786	Body		CAPZB
cg18649028	global	6	155428138	5'UTR		TIAM2
cg09874127	global	3	49851439	TSS200		UBA7
cg16166559	global	22	45072588	5'UTR;TSS200;5'UTR;TSS200		PRR5;PRR5;PRR5;PRR5
cg11442173	global	17	61515312	5'UTR;5'UTR;5'UTR	Island	CYB561;CYB561;CYB561
cg05137587	global	3	197026407	TSS1500;TSS1500	S_Shore	DLG1;DLG1
cg12197421	global	6	30653736	Body;1stExon	N_Shore	KIAA1949;KIAA1949
cg00432937	global	7	100879557	Body	S_Shelf	CLDN15
cg11029367	global	3	124705145	Body		HEG1
cg10014112	global	7	134832844	1stExon;5'UTR		TMEM140;TMEM140
cg12577010	global	7	134832544	TSS1500		TMEM140
cg02724472	global	7	102553293	TSS200;Body;TSS200;Body		LRRC17;FBXL13;LRRC17;FBXL13
cg12699156	global	17	7517016	TSS1500;Body	N_Shore	SHBG;FXR2
cg22514682	global	19	35837636	3'UTR		CD22
cg22365167	global	11	62306861	5'UTR;5'UTR		AHNAK;AHNAK
cg22103219	global	7	101934892	Body	N_Shore	SH2B2
cg20018782	global	14	23317496		S_Shelf
cg06947286	global	5	131596602	Body;Body	S_Shelf	PDLIM4;PDLIM4
cg14768785	global	3	172166517	TSS1500;TSS1500	Island	GHSR;GHSR
cg03479209	global	3	58020999	Body;Body;Body;Body		FLNB;FLNB;FLNB;FLNB
cg14244636	global	10	100055918
cg08979319	global	6	100896055	Body	Island	SIM1
cg18188010	global	15	42187036	TSS1500		SPTBN5
cg06641342	global	17	61514920	5'UTR;5'UTR;5'UTR	Island	CYB561;CYB561;CYB561
cg23263937	global	7	27192656		N_Shore
cg11389172	global	10	50818299	TSS200;5'UTR	Island	SLC18A3;CHAT
cg06433467	global	5	67730071
cg17518550	global	1	247712383	TSS200		C1orf150
cg06193628	global	2	228526145
cg13578652	global	21	43823863	TSS200;TSS200		UBASH3A;UBASH3A
cg25749306	global	19	46997775	1stExon	Island	PNMAL2
cg11761483	global	17	70723386	Body;Body		SLC39A11;SLC39A11
cg21361094	global	12	58021917	Body	Island	B4GALNT1
cg09844907	global	16	15489619	1stExon;5'UTR;1stExon;5'UTR	Island	MPV17L;MPV17L;MPV17L;MPV17L
cg24354581	global	21	38079615	Body;Body	N_Shore	SIM2;SIM2
cg10777103	global	11	113345325	5'UTR;5'UTR	Island	DRD2;DRD2
cg21195376	global	1	204449827	5'UTR		PIK3C2B
cg01621716	global	2	11636147
cg24665265	global	15	70852115
cg18762727	global	7	101006089	TSS200	Island	EMID2
cg14833385	global	6	32921142	TSS1500		HLA-DMA
cg10502118	global	3	16553697	5'UTR	N_Shore	RFTN1
cg23621418	global	10	75670653	TSS1500;3'UTR;TSS1500	N_Shore	PLAU;C10orf55;PLAU
cg24002522	global	3	105247852	Body		ALCAM
cg05548488	global	3	50658472	Body	S_Shelf	MAPKAPK3
cg15936999	global	17	73840853	TSS200		UNC13D
cg19841005	global	19	3687854	Body	Island	PIP5K1C
cg08701937	global	10	81965488	TSS200;TSS200;TSS200	Island	ANXA11;ANXA11;ANXA11
cg14438213	global	14	76599500		N_Shore
cg02737268	global	20	3780182	Body;Body;Body	S_Shelf	CDC25B;CDC25B;CDC25B
cg07561162	global	16	10174417	Body;Body;Body		GRIN2A;GRIN2A;GRIN2A
cg23696949	global	1	183155644	Body;Body		LAMC2;LAMC2
cg06614044	global	18	42324631	Body;Body	Island	SETBP1;SETBP1
cg25198049	global	1	151509723	Body	N_Shelf	CGN
cg07126235	global	6	43192225	3'UTR		CUL9
cg04614923	global	12	93096622	TSS1500		C12orf74
cg07544796	global	6	36817048
cg06215569	global	1	110611465	Body	Island	ALX3
cg17109042	global	12	99139387	3'UTR;Body;Body	Island	ANKS1B;ANKS1B;ANKS1B
cg09245302	global	17	80294560		S_Shelf
cg27135125	global	7	23510082	TSS200	S_Shore	IGF2BP3
cg27614309	global	16	85478580
cg01020263	global	16	50732073	Body		NOD2
cg26314722	global	1	234867300
cg22538557	global	19	48021503		S_Shelf
cg17832704	global	17	7516888	TSS1500;Body	N_Shore	SHBG;FXR2
cg00283857	global	6	158018184	Body;Body	S_Shelf	ZDHHC14;ZDHHC14
cg22854448	global	2	65617203	Body		SPRED2
cg15315056	global	3	184504579
cg21540367	global	7	100175462	Body	S_Shelf	LRCH4
cg15751116	global	7	42267383	5'UTR	N_Shore	GLI3
cg11909137	global	18	46461202	Body		SMAD7
cg16645584	global	1	59247487	3'UTR;1stExon	Island	JUN;JUN
cg18274619	global	3	127494852	Body;Body		MGLL;MGLL
cg19358397	global	11	1794018
cg26781303	global	16	4233131		N_Shore
cg10977795	global	6	158507753	Body	Island	SYNJ2
cg25385322	global	7	100884094	Body	N_Shelf	FIS1
cg11293610	global	21	34755681
cg16552822	global	1	19278734	Body	N_Shelf	IFFO2
cg09456094	global	2	231280878	5'UTR;1stExon;1stExon;5'UTR		SP100;SP100;SP100;SP100
cg09799983	global	2	38301756	Body	Island	CYP1B1
cg13544294	global	17	70188923
cg03598112	global	17	28691021
cg25599475	global	7	853038		Island
cg09341491	global	16	50707795	Body;Body;Body	Island	SNX20;SNX20;SNX20
cg02749511	global	2	174696522
cg15511120	global	11	6598119
cg00812299	global	1	61508853		Island
cg19978181	global	5	76923988		Island
cg18936620	global	1	43811019	Body	N_Shelf	MPL
cg01447112	global	7	6703803		Island
cg03216991	global	17	2415620	TSS1500	S_Shore	METT10D
cg13300689	global	12	9826503	Body;Body		CLEC2D;CLEC2D
cg12979844	global	13	46425929	TSS200		SIAH3
cg19692750	global	11	64099435
cg15285733	global	17	10039537	Body		GAS7
cg06699216	global	8	19333253	Body;Body;Body		CSGALNACT1;CSGALNACT1;CSGALNACT1
cg22618215	global	3	62354489		Island
cg07170300	global	12	59434386
cg05573306	global	3	183894763	5'UTR;5'UTR	S_Shore	AP2M1;AP2M1
cg27155939	global	15	40347163
cg06928346	global	12	12849096	1stExon;5'UTR	Island	GPR19;GPR19
cg18016194	global	8	85097157	5'UTR;5'UTR;1stExon;5'UTR;5'UTR	Island	RALYL;RALYL;RALYL;RALYL;RALYL
cg26824216	global	3	187086147	TSS200		RTP4
cg04636402	global	5	139284774	Body;Body;Body;Body	S_Shore	NRG2;NRG2;NRG2;NRG2
cg12472597	global	11	67141742	Body;TSS1500;TSS200	S_Shore	LOC100130987;CLCF1;CLCF1
cg22004069	global	19	5585648		N_Shelf
cg10880902	global	1	59278781		N_Shore
cg03217795	global	16	23847556	1stExon;1stExon	Island	PRKCB;PRKCB
cg02583740	global	7	612613	Body;Body;Body;Body;Body;Body	Island	PRKAR1B;PRKAR1B;PRKAR1B;PRKAR1B;PRKAR1B;PRKAR1B
cg00734629	global	7	128471146	Body;Body	Island	FLNC;FLNC
cg20706495	global	1	12222054
cg22332233	global	X	48897515	Body	N_Shelf	TFE3
cg20834178	global	4	6944071	Body;Body		TBC1D14;TBC1D14
cg11012584	global	2	242549943	Body;Body	Island	THAP4;THAP4
cg15384598	global	14	24045549	Body;Body	Island	JPH4;JPH4
cg10356759	global	12	248889	Body;Body	S_Shore	IQSEC3;IQSEC3
cg07484739	global	2	177356020		S_Shore
cg14781521	global	3	129063090		Island
cg15418499	global	11	112028288	5'UTR		IL18
cg09650907	global	17	71224983	Body;Body	N_Shelf	FAM104A;FAM104A
cg17276535	global	4	3372123	Body;Body;Body	N_Shelf	RGS12;RGS12;RGS12
cg16142306	global	4	41258935	1stExon;5'UTR	Island	UCHL1;UCHL1
cg24539517	global	10	121161258	Body		GRK5
cg08544436	global	5	53814625	1stExon;1stExon;1stExon	Island	SNX18;SNX18;SNX18
cg04023915	global	11	33722062	1stExon	N_Shore	C11orf91
cg04249754	global	1	32715483	TSS1500	S_Shore	LCK
cg13223682	global	2	174889929		N_Shore
cg09363892	global	1	954619	TSS1500	N_Shore	AGRN
cg17104026	global	20	43598376	Body	S_Shelf	STK4
cg11563680	global	6	100917397		Island
cg19586576	global	17	42906845	5'UTR;5'UTR	Island	GJC1;GJC1
cg20633595	global	15	66993262	TSS1500;TSS1500	N_Shore	SMAD6;SMAD6
cg07212384	global	7	99761053	Body		GAL3ST4
cg09611490	global	2	97193080		Island
cg13912573	global	9	92293297	Body	S_Shore	LOC100129066
cg08857906	global	1	28156999	TSS1500;TSS1500;TSS1500	N_Shore	PPP1R8;PPP1R8;PPP1R8
cg21680719	global	1	38466677	5'UTR	N_Shelf	FHL3
cg21404980	global	8	144599027	Body	N_Shelf	ZC3H3
cg15488794	global	20	30262899	Body;Body		BCL2L1;BCL2L1
cg25070639	global	17	41170693	Body	N_Shelf	VAT1
cg24497361	global	11	3858493	5'UTR	N_Shelf	RHOG
cg06043315	global	8	144640306	TSS200;5'UTR	N_Shore	GSDMD;GSDMD
cg02345613	global	8	141619483	Body;Body		EIF2C2;EIF2C2
cg19014335	global	12	50099568	Body;Body	N_Shore	FMNL3;FMNL3
cg04444771	global	10	45473712	5'UTR;Body	S_Shelf	C10orf10;RASSF4
cg21402832	global	3	172241069	1stExon		TNFSF10
cg08553963	global	12	46774439		N_Shelf
cg12157156	global	12	124880173	Body;Body		NCOR2;NCOR2
cg26443127	global	10	31987230
cg24607755	global	11	36171375	Body		LDLRAD3
cg24680129	global	12	13318625
cg00213479	global	5	2038899		Island
cg12371587	global	22	42093157	3'UTR	N_Shelf	C22orf46
cg25568490	global	5	148812353	Body		LOC728264
cg01815263	global	3	5237478	Body		EDEM1
cg10506618	global	3	42246902	Body;Body	S_Shelf	TRAK1;TRAK1
cg15925478	global	1	94081080	Body		BCAR3
cg10168149	global	2	200335558	Body	Island	FLJ32063
cg26530713	global	1	153928406	Body	N_Shelf	CRTC2
cg22519017	global	20	62371961	Body	Island	SLC2A4RG
cg05393023	global	1	168194826	TSS1500	N_Shore	SFT2D2
cg17802600	global	19	30717501		Island
cg06208382	global	12	63260327	Body		PPM1H
cg17635080	global	12	109030115
cg12999453	global	17	59482319	Body	Island	TBX2
cg02587606	global	10	77352231
cg17095147	global	4	10101400	Body;Body		WDR1;WDR1
cg04741118	global	12	96720813	Body;Body		CDK17;CDK17

## Sheet: Additional Table 2
	precision	recall	f1-score	support
Adrenal gland Adrenal cortical carcinoma	1	0.9	0.947368	10
Adrenal gland Neuroblastoma	1	1	1	25
Adrenal gland Pheochromocytoma	1	1	1	38
Anterior mediastinum Thymoma	0.428571	0.25	0.315789	12
Bladder Transitional cell carcinoma	0.887755	0.945652	0.915789	92
Blood or Bone marrow Acute lymphocytic leukemia	0.941176	0.888889	0.914286	18
Blood or Bone marrow Acute myeloid leukemia	0.962162	0.903553	0.931937	197
Blood or Bone marrow Acute myelomonocytic leukemia	0.5	0.928571	0.65	14
Blood or Bone marrow Chronic lymphocytic leukemia	1	1	1	31
Blood or Bone marrow Healthy	0.915254	0.931034	0.923077	58
Bones Osteosarcoma	1	1	1	23
Brain Astrocytoma	0.698113	0.755102	0.72549	49
Brain Glioblastoma	0.922222	0.943182	0.932584	88
Brain Oligodendroglioma	0.846154	0.733333	0.785714	45
Breast Healthy	0.962963	1	0.981132	26
Breast Infiltrating duct carcinoma	0.939655	0.819549	0.875502	133
Breast Lobular carcinoma	0.592593	0.820513	0.688172	39
Cervix uteri Adenocarcinoma	1	0.416667	0.588235	12
Cervix uteri Squamous cell carcinoma	0.93	0.920792	0.925373	101
Colon Adenocarcinoma	0.989691	0.969697	0.979592	99
Colon Healthy	0.857143	1	0.923077	12
Esophagus Adenocarcinoma	0.681818	0.681818	0.681818	22
Esophagus Squamous cell carcinoma	0.8	0.8	0.8	20
Head and Neck Healthy	1	0.870968	0.931034	31
Head and Neck Squamous cell carcinoma	0.87218	0.899225	0.885496	129
Kidney Clear cell adenocarcinoma	0.918919	0.985507	0.951049	69
Kidney Healthy	0.990991	1	0.995475	110
Kidney Malignant rhabdoid tumor	1	1	1	20
Kidney Papillary adenocarcinoma	0.934426	0.919355	0.926829	62
Kidney Renal cell carcinoma	1	0.989474	0.994709	95
Kidney Wilms tumor	1	1	1	54
Liver Healthy	1	1	1	14
Liver Hepatocellular carcinoma	0.988372	1	0.994152	85
Lung Adenocarcinoma	0.927007	0.933824	0.930403	136
Lung Healthy	0.990654	0.972477	0.981481	109
Lung Squamous cell carcinoma	0.862903	0.89916	0.880658	119
Ovarian Serous cancer	0.96875	0.96875	0.96875	32
Pancreas Healthy	0.904762	1	0.95	19
Pancreas Infiltrating duct carcinoma	0.98	0.960784	0.970297	51
Pleura Epithelioid mesothelioma	1	0.9	0.947368	10
Prostate gland Acinar cell carcinoma	0.818182	0.882353	0.849057	51
Prostate gland Adenocarcinoma	0.910112	0.764151	0.830769	106
Prostate gland Healthy	0.764706	0.8125	0.787879	16
Retroperitoneum Dedifferentiated liposarcoma	0.727273	1	0.842105	8
Retroperitoneum Leiomyosarcoma	1	0.909091	0.952381	11
Skin Malignant melanoma	1	0.981818	0.990826	110
Stomach Carcinoma	0.881579	0.881579	0.881579	76
Testis Seminoma	1	1	1	19
Thymus Thymoma	0.678571	0.826087	0.745098	23
Thyroid gland Healthy	0.75	1	0.857143	12
Thyroid gland Papillary carcinoma	0.97561	0.952381	0.963855	126
Uterus Endometrioid adenocarcinoma	0.928571	0.94702	0.937705	151
Uterus Healthy	0.928571	0.928571	0.928571	14
Uterus Serous cystadenocarcinoma	0.733333	0.814815	0.77193	27
accuracy	0.91762	0.91762	0.91762	0.91762
macro avg	0.894273	0.900153	0.891325	3059
weighted avg	0.922435	0.91762	0.917955	3059

## Sheet: Additional Table 3
	precision	recall	f1-score	support
Blood or Bone marrow Acute myeloid leukemia	0.985075	0.980198	0.98263	202
Brain Glioblastoma	1	0.866071	0.92823	112
Breast Healthy	0.9375	1	0.967742	15
Breast Infiltrating duct carcinoma	0.592593	0.888889	0.711111	18
Colon Adenocarcinoma	0.853659	0.729167	0.786517	48
Colon Healthy	0.967391	0.908163	0.936842	196
Head and Neck Squamous cell carcinoma	0.8	0.75	0.774194	16
Liver Healthy	0.96875	0.861111	0.911765	72
Liver Hepatocellular carcinoma	0.96337	0.977695	0.97048	269
Lung Adenocarcinoma	0.985075	0.88	0.929577	300
Lung Healthy	0.526316	0.909091	0.666667	11
Lung Squamous cell carcinoma	0.666667	0.526316	0.588235	19
Prostate gland Adenocarcinoma	0.525	1	0.688525	21
Prostate gland Healthy	0.666667	0.714286	0.689655	14
Skin Malignant melanoma	1	0.958716	0.978923	218
Stomach Carcinoma	0.828571	0.966667	0.892308	30
Thyroid gland Healthy	0.918367	0.9375	0.927835	48
Thyroid gland Papillary carcinoma	0.983051	0.935484	0.958678	62
Uterus Endometrioid adenocarcinoma	1	0.882883	0.937799	111
macro avg	0.85095	0.877486	0.85409	1782
micro avg	0.944928	0.914703	0.929569	1782
weighted avg	0.954669	0.914703	0.931525	1782

## Sheet: Additional Table 4
	precision	recall	f1-score	support
Breast	1	0.928571	0.962963	28
Head and Neck	1	0.837838	0.911765	74
Lung	0.933333	1	0.965517	14
Prostate gland	1	1	1	13
Skin	1	1	1	37
macro avg	0.986667	0.953282	0.968049	166
micro avg	0.993464	0.915663	0.952978	166
weighted avg	0.994378	0.915663	0.951511	166

## Sheet: Additional Table 5
CpG	Transformation	CHR	MAPINFO	UCSC_RefGene_Group	Relation_to_UCSC_CpG_Island	UCSC_RefGene_Name
cg10699884	global	1	21661045	Body		ECE1
cg09988837	global	1	224811939	Body		CNIH3
cg21954370	global	15	45018720
cg19968041	local	12	133364866	Body	N_Shore	GOLGA3
cg26359133	global	12	111847419	5'UTR	S_Shelf	SH2B3
cg07402729	None	11	61062902	TSS200	Island	VWCE
cg07549381	global	16	88769970	Body	N_Shelf	RNF166
cg20685713	global	1	156066986
cg11655490	global	12	12038352	Body		ETV6
cg15129183	global	5	169760269	Body		LOC257358
cg10098021	global	6	30653732	Body;1stExon	N_Shore	KIAA1949;KIAA1949
cg02556655	global	11	63975026	Body;Body	Island	FERMT3;FERMT3
cg07220152	global	6	30737270
cg02933362	global	2	102091607	TSS1500	S_Shore	RFX8
cg08500112	global	5	59086432	Body;Body		PDE4D;PDE4D
cg09533087	global	8	436965
cg09272948	global	20	39958363
cg13921921	global	1	155931763	Body;Body;Body		ARHGEF2;ARHGEF2;ARHGEF2
cg10191240	global	8	134230101	Body;Body		WISP1;WISP1
cg25098174	global	17	61512571	Body;Body;Body	S_Shore	CYB561;CYB561;CYB561
cg23203234	local	8	103751623		S_Shore
cg03063658	global	2	109949132	Body		SH3RF3
cg07080244	global	11	120051676
cg01553231	global	5	141072866		S_Shore
cg18973247	global	1	27070873	Body;Body		ARID1A;ARID1A
cg09797463	global	10	90995297	Body;Body		LIPA;LIPA
cg27195914	global	16	66907460		S_Shore
cg11152384	global	11	68934300
cg04177251	global	4	8193123
cg12593541	global	1	181110845
cg17753789	global	10	81026766	Body		ZMIZ1
cg07168232	global	1	209822928	Body;Body;Body		LAMB3;LAMB3;LAMB3
cg02328930	local	16	85591871		S_Shore
cg13994232	None	14	32671882		N_Shore
cg14685946	global	2	223784609	Body;Body		ACSL3;ACSL3
cg07078958	global	3	15311183	Body;Body		SH3BP5;SH3BP5
cg07644807	global	16	88769854	Body	N_Shelf	RNF166
cg06433467	global	5	67730071
cg10267724	global	20	24615715	Body		TMEM90B
cg19348484	global	15	91413236	5'UTR	N_Shore	FURIN
cg07941108	global	14	90741814
cg04859102	global	6	31527893
cg16210355	global	13	107028903
cg06451739	None	5	170108303	Body;Body;Body		KCNIP1;KCNIP1;KCNIP1
cg00102996	None	9	92220617	Body	Island	GADD45G
cg04098866	None	16	51190201		Island
cg12421755	None	15	53080933	Body	Island	ONECUT1
cg12565681	None	17	74497418	5'UTR;5'UTR	Island	RHBDF2;RHBDF2
cg17695462	None	10	133999320	TSS1500	Island	DPYSL4
cg14249922	None	9	92221133	3'UTR	Island	GADD45G
cg10954251	None	2	162272400	TSS1500	N_Shore	TBR1
cg17281677	global	12	6658557	Body;TSS1500;Body	S_Shore	IFFO1;IFFO1;IFFO1
cg02927448	global	12	100532162	Body;Body	N_Shelf	UHRF1BP1L;UHRF1BP1L
cg12935170	None	7	23508189	Body	Island	IGF2BP3
cg04267345	None	14	24835104	TSS1500	N_Shore	NFATC4
cg18361093	None	10	135193212	Body;Body;Body	Island	PAOX;PAOX;PAOX
cg13212283	None	12	57632120	5'UTR	Island	NDUFA4L2
cg07961887	None	8	82192601	TSS200	Island	FABP5
cg05598678	global	8	133773099	TSS200;TSS200		TMEM71;TMEM71
cg04404540	None	17	72270444	1stExon;5'UTR	Island	DNAI2;DNAI2
cg12332674	global	6	34252820
cg23521905	local	12	129298690	Body;Body		SLC15A4;MGC16384
cg20294319	global	13	47253842	Body;Body;Body		LRCH1;LRCH1;LRCH1
cg27344587	None	2	63275602	TSS1500	Island	LOC100132215
cg19426625	local	2	9518324	Body;Body	S_Shelf	ASAP2;ASAP2
cg18185958	None	2	223176899		Island
cg07911961	global	12	70083193	Body;TSS200		BEST3;BEST3
cg24419324	None	2	223172329		S_Shore
cg11460727	None	8	22548952	Body	Island	EGR3
cg04361551	None	3	134125573		Island
cg14140881	None	7	105222019	TSS200	N_Shore	EFCAB10
cg17147211	None	1	119544070		Island
cg17525495	None	17	56401734	Body;Body	Island	BZRAP1;BZRAP1
cg09130077	None	17	46810702		Island
cg10205045	None	15	69087809	Body		ANP32A
cg20119464	None	12	50015929	TSS1500	N_Shore	PRPF40B
cg13439181	None	9	35757158		Island
cg20051292	None	8	101118512	TSS200	Island	RGS22
cg18357048	None	6	125684780		Island
cg18565132	None	8	103613344		Island
cg02018277	None	15	65116255	Body	Island	PIF1
cg00424276	None	7	105222180	TSS1500	N_Shore	EFCAB10
cg13189271	None	6	15365693	Body		JARID2
cg26067203	None	1	1935289	TSS200	Island	KIAA1751
cg22471726	None	17	46719276		N_Shore
cg01815671	None	3	126113663	TSS200	Island	CCDC37
cg17231661	None	11	119039801	5'UTR;5'UTR	Island	NLRX1;NLRX1
cg09915396	None	17	2907895	Body;Body		RAP1GAP2;RAP1GAP2
cg05907046	None	2	187713986	TSS200	Island	ZSWIM2
cg27645955	None	22	21386885	TSS200	Island	SLC7A4
cg03654433	None	5	176170566		Island
cg19989295	None	14	24641077	TSS200;TSS200	Island	REC8;REC8
cg09420637	None	10	102906525		Island
cg11841450	None	5	133406986		Island
cg23100152	None	11	10472156	TSS200	Island	AMPD3
cg03994465	None	1	119544230		Island
cg13088406	None	12	69725117
cg07795766	None	22	45608516	Body;TSS200		C22orf9;C22orf9
cg27485223	None	7	105332220	Body		ATXN7L1
cg03513762	None	6	30923420		Island
cg02249490	local	17	42004878
cg02049629	None	6	28662065
cg15892963	None	14	96670960	TSS200		BDKRB2
cg20190772	None	8	48572496	Body		KIAA0146
cg17619311	None	3	42947565	TSS200;5'UTR;1stExon	Island	ZNF662;ZNF662;ZNF662
cg20242280	None	17	64826184
cg08815340	None	6	5026435
cg10504885	None	1	27358363
cg04492858	None	10	133558786
cg10814005	None	14	91711041	5'UTR		GPR68
cg06711254	local	2	186924071
cg02611085	None	7	128550410	Body;Body	Island	KCP;KCP
cg19702675	None	2	171387064	Body;Body;Body		MYO3B;MYO3B;MYO3B
cg14085060	local	9	107827215
cg20883831	None	7	150652948	TSS200;Body;Body	Island	KCNH2;KCNH2;KCNH2
cg12116288	None	17	70215735
cg12446199	None	1	167408841	Body;Body	Island	CD247;CD247
cg14661383	None	1	228463720	Body;Body	Island	OBSCN;OBSCN
cg08988364	None	3	143566850	Body		SLC9A9
cg24333845	None	3	152016806	TSS1500;5'UTR;TSS1500;TSS1500;TSS1500;TSS1500;5'UTR		MBNL1;MBNL1;MBNL1;MBNL1;MBNL1;MBNL1;MBNL1
cg07294774	None	14	80678613	TSS1500;TSS200;TSS200		DIO2;DIO2;DIO2
cg11006267	None	5	139017424		Island
cg13152952	None	8	41570554	Body;Body;Body;Body;Body		ANK1;ANK1;ANK1;ANK1;ANK1
cg11385003	None	21	45148332	Body	N_Shore	PDXK
cg01224366	None	21	45148694	Body	Island	PDXK
cg22948808	None	11	46360763	Body		DGKZ
cg08285151	None	7	18534872	TSS1500;TSS1500;TSS1500;TSS1500;TSS1500		HDAC9;HDAC9;HDAC9;HDAC9;HDAC9
cg12061357	None	21	46131601	TSS200	S_Shore	C21orf29
cg12360424	local	4	54568961
cg21791662	None	2	121625208	Body	Island	GLI2
cg25024734	local	10	112152815
cg11242791	None	19	10406958	Body	Island	ICAM5
cg03803177	None	16	89766324	Body	N_Shore	SPATA2L
cg03743205	None	16	88600835	Body	Island	ZFPM1
cg11195002	None	19	10399805	TSS1500	N_Shore	ICAM5
cg02391906	None	9	103792059	5'UTR	Island	LPPR1
cg09913956	None	19	1776600		Island
cg10663055	None	6	86159251	TSS200	N_Shore	NT5E
cg05260062	None	19	1752206	TSS1500	N_Shore	ONECUT3
cg14718568	None	5	76011304	TSS1500	Island	F2R
cg00473031	None	19	1752325	TSS1500	N_Shore	ONECUT3
cg22683038	None	1	180203135	Body	Island	LHX4
cg13188011	None	20	39319326	TSS1500	Island	MAFB
cg26482665	None	19	59073902	Body;Body;Body	Island	MZF1;MZF1;LOC100131691
cg26971783	global	15	77857997
cg22114840	None	19	1750212		Island
cg02091605	None	19	1776102		Island
cg27561006	local	11	82611204	Body;Body	N_Shore	PRCP;PRCP
cg27286993	None	16	3078548	Body	Island	CCDC64B
cg01793179	None	3	10207023	Body	Island	IRAK2
cg05594525	None	8	53476865	Body	N_Shore	FAM150A
cg12308909	None	6	167042108	TSS1500;Body	S_Shore	RPS6KA2;RPS6KA2
cg05313771	None	19	1762435	Body	Island	ONECUT3
cg25470077	None	19	10406364	Body	Island	ICAM5
cg17924936	None	19	1763800	Body	S_Shore	ONECUT3
cg08400814	None	5	56204995	TSS200	Island	C5orf35
cg11609001	None	19	18901843	Body	Island	COMP
cg00103132	local	1	45956932	TSS200	S_Shore	TESK2
cg21035368	None	19	45947788		Island
cg21098990	None	19	10399845	TSS1500	Island	ICAM5
cg03894975	None	1	29586570	Body;Body;Body	Island	PTPRU;PTPRU;PTPRU
cg08845333	None	19	10403403	Body	Island	ICAM5
cg27561006	None	11	82611204	Body;Body	N_Shore	PRCP;PRCP
cg05142677	None	16	88601446	3'UTR	Island	ZFPM1
cg05780177	None	1	197744757	TSS200;TSS200	Island	DENND1B;DENND1B
cg18945842	None	22	42306589		Island
cg01641792	local	19	10572362	Body;Body;Body;Body		PDE4A;PDE4A;PDE4A;PDE4A
cg14430974	None	9	21995735	Body;TSS1500	Island	CDKN2BAS;CDKN2A
cg08576598	None	7	116962626	Body;Body	N_Shore	WNT2;WNT2
cg10731700	None	19	1760259	Body	N_Shelf	ONECUT3
cg07828612	local	1	174417175	TSS200;Body		GPR52;RABGAP1L
cg02630819	local	2	97651765	5'UTR	Island	FAM178B
cg21231458	None	20	21485933		Island
cg24754199	global	10	559376	Body		DIP2C
cg01438685	global	7	907934	Body;Body	S_Shelf	UNC84A;UNC84A
cg21749794	global	13	114876210	Body	N_Shore	RASA3
cg18030833	None	3	137490793		Island
cg12974599	global	22	46770195	Body	N_Shore	CELSR1
cg01901101	global	1	9486939		N_Shore
cg24262325	global	21	43305576	3'UTR;3'UTR		C2CD2;C2CD2
cg05782292	global	11	628318	TSS1500	S_Shore	SCT
cg09047390	global	2	242938764
cg15626405	global	5	536047		N_Shore
cg07834314	local	7	2771155	Body	N_Shelf	GNA12
cg21130374	global	21	42734266	5'UTR		MX2
cg08557246	global	4	8081417	Body;Body;Body;Body;Body;Body;Body		ABLIM2;ABLIM2;ABLIM2;ABLIM2;ABLIM2;ABLIM2;ABLIM2
cg11351927	global	10	557886	Body		DIP2C
cg09159795	global	7	151127123	3'UTR	N_Shore	CRYGN
cg04332442	global	22	46770063	Body	N_Shore	CELSR1
cg13483797	global	9	132431581	Body	S_Shelf	PRRX2
cg00049323	None	5	472564	Body	N_Shore	LOC25845
cg26736232	global	11	628603	TSS1500	S_Shore	SCT
cg08155879	local	17	80754105	Body		TBCD
cg02314201	global	10	134843775		Island
cg04717485	global	1	9486780		N_Shelf
cg09639152	global	3	45078075		S_Shore
cg13581527	global	7	1708566		Island
cg18843944	global	7	157544580	Body;Body;Body		PTPRN2;PTPRN2;PTPRN2
cg01692482	global	20	52198378	1stExon	Island	ZNF217
cg10687219	global	11	68174286	Body		LRP5
cg16447311	global	6	1604134		N_Shore
cg18843944	local	7	157544580	Body;Body;Body		PTPRN2;PTPRN2;PTPRN2
cg20673132	global	19	1368815	Body;Body	Island	MUM1;MUM1
cg06580770	global	6	32054790	Body	N_Shore	TNXB
cg14737484	global	6	32054561	Body	N_Shore	TNXB
cg13633560	global	11	76380921	5'UTR;1stExon;5'UTR	N_Shore	LRRC32;LRRC32;LRRC32
cg23965720	global	1	235805770	5'UTR;5'UTR;5'UTR	Island	GNG4;GNG4;GNG4
cg17604429	global	5	7827133	3'UTR		ADCY2
cg08679800	global	8	101912325
cg15085447	None	3	137490846		Island
cg10515232	global	2	240062353	Body	S_Shore	HDAC4
cg05656374	global	21	42733825	TSS200		MX2
cg13868473	global	7	2105385	Body;Body;Body	N_Shore	MAD1L1;MAD1L1;MAD1L1
cg26353121	local	6	86324687	Body;Body;Body;Body;Body;Body		SYNCRIP;SYNCRIP;SYNCRIP;SYNCRIP;SYNCRIP;SYNCRIP
cg24377330	None	3	149375961	5'UTR;TSS200;TSS200	Island	WWTR1;WWTR1;WWTR1
cg16050349	local	3	138478129	1stExon		PIK3CB
cg27530628	local	20	44037436	Body;Body;Body;Body;Body;Body;Body	S_Shore	DBNDD2;DBNDD2;SYS1-DBNDD2;DBNDD2;DBNDD2;DBNDD2;DBNDD2
cg00852705	global	15	62090739
cg01569500	None	9	140051495	Body;Body;Body	Island	GRIN1;GRIN1;GRIN1
cg05202073	local	8	143427461	Body	N_Shore	TSNARE1
cg20223754	local	8	1829898	Body	N_Shore	ARHGEF10
cg06008480	None	11	113185089	TSS200	N_Shore	TTC12
cg08067991	local	4	1356603	Body		KIAA1530
cg25447872	local	13	113492708	Body;Body	Island	ATP11A;ATP11A
cg14180938	local	1	173682610	TSS1500	N_Shore	KLHL20
cg26130384	local	7	55980165	TSS200		ZNF713
cg11415402	local	1	10509733	Body;TSS1500		APITD1;CORT
cg15103567	local	17	45894729	Body	S_Shelf	OSBPL7
cg22159815	local	1	207975264	Body		MIR29C
cg09176901	local	12	56818627	Body		TIMELESS
cg03241897	local	11	2985112	Body;Body		SNORA54;NAP1L4
cg20969543	local	19	10218999	Body;Body;TSS1500	N_Shore	PPAN-P2RY11;PPAN;SNORD105B
cg27274322	local	4	1357073	Body		KIAA1530
cg08456140	local	10	34399658
cg18392391	local	11	18618452
cg05324734	local	13	113467798	Body;Body	S_Shelf	ATP11A;ATP11A
cg26502057	local	5	14278582	Body		TRIO
cg03758732	local	2	2030712	5'UTR		MYT1L
cg11698750	None	15	76005189	TSS200		CSPG4
cg22817650	global	1	193191405	Body		CDC73
cg19837751	local	22	17645416	Body;Body;Body		CECR5;CECR4;CECR4
cg22787719	local	1	209570949
cg06229737	local	6	34391778	Body	N_Shore	RPS10
cg06945523	None	14	36974800	Body	Island	SFTA3
cg00069432	local	8	99836388	Body	N_Shore	STK3
cg01024069	local	14	104158878	Body;Body		KLC1;KLC1
cg06545359	local	16	88029433	Body;Body	N_Shelf	BANP;BANP
cg11468199	local	5	1501109	Body		LPCAT1
cg07629149	local	10	334731	Body		DIP2C
cg12227954	local	10	334493	Body		DIP2C
cg21253188	local	19	33878798	Body;Body;Body	Island	PEPD;PEPD;PEPD
cg08778287	local	15	99499615	Body	N_Shore	IGF1R
cg19635644	local	13	100007277	Body;TSS1500;Body;Body		UBAC2;MIR623;UBAC2;UBAC2
cg06773247	local	17	2274557	Body;Body	N_Shore	SGSM2;SGSM2
cg09964625	local	8	143460768	5'UTR		TSNARE1
cg23737927	global	12	5149153		N_Shelf
cg01127412	local	3	39232857	5'UTR		XIRP1
cg18690385	local	1	47078966	Body;Body	Island	MOBKL2C;MOBKL2C
cg06187344	local	10	3151576	Body	S_Shelf	PFKP
cg10055231	global	1	6651358	3'UTR	N_Shelf	KLHL21
cg11523799	local	6	43479817	TSS1500;3'UTR	S_Shore	C6orf154;YIPF3
cg12538522	global	7	1897374	Body;Body;Body	S_Shore	MAD1L1;MAD1L1;MAD1L1
cg02112183	local	6	170754881		N_Shore
cg10966208	local	4	866710	Body	S_Shore	GAK
cg27290103	local	2	218713647	Body		TNS1
cg12872398	local	19	5110601	Body	Island	KDM4B
cg03893701	global	3	139395765	5'UTR	N_Shore	NMNAT3
cg03796024	local	10	3151764	Body	S_Shelf	PFKP
cg11171094	global	6	132126370		N_Shelf
cg10822665	global	17	1028394	Body;Body	N_Shore	ABR;ABR
cg22489510	global	2	8675599
cg23054840	global	10	45920485	Body	N_Shelf	ALOX5
cg07319315	local	2	135149599	Body		MGAT5
cg03170670	local	3	194930312	Body		C3orf21
cg14442302	local	9	140108641	Body;Body;Body;Body	S_Shore	NDOR1;NDOR1;NDOR1;NDOR1
cg17035539	global	1	229544326		S_Shore
cg10968815	local	20	31595346	TSS200		BPIL1
cg09412069	local	12	109887582	3'UTR		KCTD10
cg22450045	local	7	4839495	Body		RADIL
cg08669096	global	11	121229765		N_Shelf
cg06580879	local	17	4443121	3'UTR;Body;Body	S_Shelf	SPNS2;MYBBP1A;MYBBP1A
cg24166100	global	2	218886643
cg06468347	global	17	3705875	TSS1500		ITGAE
cg09505513	global	7	5432820	Body	S_Shelf	TNRC18
cg20758651	local	19	33878901	Body;Body;Body	Island	PEPD;PEPD;PEPD
cg07826172	local	22	47017356		Island
cg18544809	local	4	6380812	Body;Body	S_Shore	PPP2R2C;PPP2R2C
cg05249744	global	17	78834710	Body;Body	S_Shelf	RPTOR;RPTOR
cg02135245	local	17	998711	Body;Body;Body		ABR;ABR;ABR
cg02825527	local	7	2087843	Body;Body;Body	N_Shore	MAD1L1;MAD1L1;MAD1L1
cg07570898	local	1	117280833		N_Shelf
cg18321423	local	7	133084947	Body;Body		EXOC4;EXOC4
cg27215916	local	8	120218354		N_Shelf
cg02230133	local	8	143424799	Body		TSNARE1
cg16433632	local	2	238778589	Body		RAMP1
cg15096465	local	10	396979	Body	Island	DIP2C
cg00298595	local	17	18909456	Body;Body;TSS1500	S_Shore	SLC5A10;SLC5A10;FAM83G
cg02511320	local	4	512739	Body;Body		PIGG;PIGG
cg26197679	local	8	142310085
cg22192275	local	2	217528557	Body		IGFBP2
cg13063617	local	1	114431096	TSS1500		BCL2L15
cg14040931	global	9	36249297	Body;Body		GNE;GNE
cg11490865	local	8	143425585	Body	N_Shelf	TSNARE1
cg15715892	local	10	105846129	TSS1500		COL17A1
cg19563415	local	10	397125	Body	Island	DIP2C
cg19249749	local	1	223853145	1stExon		CAPN8
cg01550161	local	7	107771148	TSS1500		LAMB4
cg03830375	local	17	76426088	Body		DNAH17
cg18941151	local	1	114431234	TSS1500		BCL2L15
cg13966095	local	6	52224645		N_Shelf
cg17744605	local	6	111368770	TSS200		LOC442245
cg09521575	local	8	19041618
cg15821214	local	2	95939815	TSS1500;TSS1500;TSS1500		PROM2;PROM2;PROM2
cg18801800	local	18	8612161	Body	S_Shore	RAB12
cg20659941	local	18	55888395	5'UTR;Body;TSS1500;5'UTR;5'UTR;Body;Body;Body;5'UTR		NEDD4L;NEDD4L;NEDD4L;NEDD4L;NEDD4L;NEDD4L;NEDD4L;NEDD4L;NEDD4L
cg17949727	None	1	38412684	5'UTR;1stExon		INPP5B;INPP5B
cg18121066	global	17	80794274	Body;5'UTR	S_Shelf	TBCD;ZNF750
cg04885315	local	15	57731648	Body		CGNL1
cg26309929	global	3	24083947
cg25714865	local	7	5648122		S_Shore
cg15576292	local	6	30708859	Body	N_Shore	FLOT1
cg02573176	local	8	82607505	TSS1500		SLC10A5
cg01489756	local	8	142654089
cg07762788	global	16	68833306	Body		CDH1
cg02360001	global	7	39683993	5'UTR		RALA
cg09311778	local	17	47863680		N_Shelf
cg19019198	local	3	52302402	TSS200;Body		MIRLET7G;WDR82
cg03548415	global	11	111991342
cg27302614	local	2	109559734	5'UTR	S_Shore	EDAR
cg18905856	local	4	110832806	TSS1500		EGF
cg25653759	local	18	61143218	TSS1500		SERPINB5
cg11838898	local	2	131672890	TSS1500;TSS1500	N_Shore	ARHGEF4;ARHGEF4
cg10849854	local	2	11674557	5'UTR		GREB1
cg04492826	local	3	48937610	TSS1500	S_Shore	SLC25A20
cg24270182	local	8	9046418
cg06352352	local	16	67181466	3'UTR	N_Shore	C16orf70
cg14385738	local	1	114414340	5'UTR;1stExon;5'UTR;1stExon		PTPN22;PTPN22;PTPN22;PTPN22
cg01288184	global	18	20811408	Body;Body;Body		CABLES1;CABLES1;CABLES1
cg17418085	local	1	31229122	Body		LAPTM5
cg26680608	local	6	136915556	Body		MAP3K5
cg07474842	local	6	136915088	Body		MAP3K5
cg27628707	global	15	31727289
cg10255237	global	12	90150622
cg08800893	global	22	36727569	Body		MYH9
cg18231184	global	7	97762571	Body		LMTK2
cg03052794	global	19	908894	Body	N_Shelf	C19orf22
cg02046562	local	3	58200021	5'UTR		DNASE1L3
cg22164298	global	4	114276834	Body;Body;Body		ANK2;ANK2;ANK2
cg03278514	global	15	70779346
cg07016356	local	2	219032435	TSS1500		CXCR1
cg09417692	global	3	30700056	Body;Body		TGFBR2;TGFBR2
cg10657228	local	8	10386222	Body		T-SP1
cg22945824	local	13	114115194	Body		DCUN1D2
cg26561413	global	17	5488048	TSS1500;TSS1500;TSS1500;TSS1500;TSS1500		NLRP1;NLRP1;NLRP1;NLRP1;NLRP1
cg01733904	global	13	110493045
cg03933646	local	1	55317098	3'UTR		DHCR24
cg18442362	global	7	44677772	Body;Body;Body		OGDH;OGDH;OGDH
cg23192683	global	3	194208907		S_Shore
cg12534147	global	5	54040362
cg03373714	global	2	147632094
cg17508434	local	7	97831974	Body	N_Shelf	LMTK2
cg00233633	global	7	29153560	Body;Body		CPVL;CPVL
cg04915566	global	21	36421472	5'UTR;1stExon		RUNX1;RUNX1
cg04134235	local	2	16804749	5'UTR		FAM49A
cg15601264	global	17	54864697
cg26369418	global	5	131409352	TSS200		CSF2
cg21108085	global	11	44591098	5'UTR;5'UTR	S_Shelf	CD82;CD82
cg09966895	local	11	78738326	Body		ODZ4
cg04956471	global	2	234328457	Body;Body		DGKD;DGKD
cg09999194	None	17	77765305		Island
cg17073273	None	6	99279795		Island
cg13247581	None	9	139948584	TSS200;TSS200	Island	ENTPD2;ENTPD2
cg09282258	None	7	29603407	TSS200	N_Shore	PRR15
cg20168412	None	3	13324132		Island
cg21052660	None	6	41342202		Island
cg26170604	None	7	8482614	Body	Island	NXPH1
cg24369185	None	6	41341601		Island
cg02033258	None	5	131593261	TSS200;TSS200	Island	PDLIM4;PDLIM4
cg00604202	None	6	99272987		Island
cg03125427	None	16	88717482	TSS200	Island	CYBA
cg23669611	None	17	1901684	Body	Island	RTN4RL1
cg25641997	None	11	64068491	Body	Island	C11orf20
cg05720261	None	1	40105304	1stExon;5'UTR	Island	HEYL;HEYL
cg08540953	None	7	100815796	Body	Island	C7orf52
cg22762844	None	2	95692424	Body;Body;Body;Body	Island	MAL;MAL;MAL;MAL
cg26740856	local	10	77163316	Body;TSS200	Island	C10orf41;C10orf41
cg16452086	None	18	77160030	TSS1500;Body;5'UTR;TSS1500;Body	Island	NFATC1;NFATC1;NFATC1;NFATC1;NFATC1
cg04101009	None	6	41340668		Island
cg00811132	None	22	19511707	1stExon;Body	Island	CLDN5;CLDN5
cg07858908	None	18	76733537		Island
cg01328119	None	1	228783545	Body	Island	DUSP5P
cg27494615	None	2	9614744	1stExon	Island	IAH1
cg18148130	None	2	190539103		Island
cg22271305	None	11	47736941	TSS1500	Island	AGBL2
cg08649099	None	7	72848049	TSS200	Island	FZD9
cg22021756	None	12	49318740	Body;Body;TSS200	Island	FKBP11;FKBP11;FKBP11
cg15441230	None	15	44069583	TSS200	Island	ELL3
cg08895440	None	1	36184853	TSS200	S_Shore	C1orf216
cg08193100	None	2	152146125	5'UTR;1stExon	Island	NMI;NMI
cg06770568	None	11	58912163	TSS200;5'UTR;5'UTR;TSS200;5'UTR	S_Shore	FAM111A;FAM111A;FAM111A;FAM111A;FAM111A
cg27632435	None	12	49658821	TSS200	Island	TUBA1C
cg10515332	None	4	99064459	TSS200	N_Shore	C4orf37
cg12300292	None	7	72847862	TSS1500	N_Shore	FZD9
cg24322333	None	6	151646584	TSS200;Body	N_Shore	AKAP12;AKAP12
cg14388195	None	17	1546961	Body;Body;Body;Body;Body	Island	SCARF1;SCARF1;SCARF1;SCARF1;SCARF1
cg00593536	None	2	139538222	TSS1500	Island	NXPH2
cg09642951	None	7	143105970	1stExon;5'UTR		EPHA1;EPHA1
cg14428815	None	7	65878911		Island
cg17912370	None	3	157261106	TSS200;TSS200;TSS200;TSS200	Island	C3orf55;C3orf55;C3orf55;C3orf55
cg25523405	None	1	999679		Island
cg26210250	local	2	26863503	Body		CIB4
cg15131808	None	5	528580		Island
cg15272362	None	20	25062823	TSS200;TSS200	Island	VSX1;VSX1
cg08543327	global	5	1108651	Body	N_Shore	SLC12A7
cg12511214	None	22	40058293	Body;Body	Island	CACNA1I;CACNA1I
cg13981425	None	20	25064268		Island
cg00593900	None	19	10206746	Body	Island	ANGPTL6
cg10046115	None	2	73404209		Island
cg06347739	None	11	2292636	TSS1500	Island	ASCL2
cg00492309	local	16	2221491	Body		TRAF7
cg25136124	global	1	228336717	TSS1500		GJC2
cg04264103	local	8	144688094	Body	N_Shelf	PYCRL
cg00346376	global	5	1110089	Body	N_Shore	SLC12A7
cg05009389	None	15	90208810	3'UTR;3'UTR	Island	PLIN1;PLIN1
cg20980299	local	8	143356985	Body	N_Shelf	TSNARE1
cg25708364	global	17	18905779	Body;Body;Body	N_Shore	SLC5A10;FAM83G;SLC5A10
cg01519253	None	12	114886463		Island
cg05853788	global	11	45924434	Body	Island	MAPK8IP1
cg22844623	local	1	228336130	TSS1500;Body;Body;Body		GJC2;GUK1;GUK1;GUK1
cg15831598	global	19	10215551	TSS1500	N_Shore	PPAN
cg04943661	None	17	34819879		Island
cg19148251	global	11	64011238	Body;Body;Body	S_Shore	FKBP2;FKBP2;FKBP2
cg10086212	None	12	49484169	Body	Island	DHH
cg18194032	global	17	79455822		Island
cg03017520	None	18	28623090	TSS1500;TSS1500	Island	DSC3;DSC3
cg09655666	None	17	34820190		Island
cg17650274	None	20	25064127	TSS1500;TSS1500	Island	VSX1;VSX1
cg09581935	local	10	114591707
cg14614881	global	9	116982494	Body		COL27A1
cg03412547	local	16	4057728	Body		ADCY9
cg16598679	global	14	90851046		S_Shore
cg14553740	global	9	18976715	Body		FAM154A
cg00130808	global	15	37178909	TSS200	N_Shore	LOC145845
cg00580752	global	5	80655015	Body;Body;Body		RNU5E;RNU5D;ACOT12
cg01434562	global	10	106201507	Body		CCDC147
cg00555456	global	7	96745696	TSS1500	N_Shore	ACN9
cg02043000	global	5	1228081	Body	S_Shore	SLC6A18
cg12969998	global	20	61689859
cg08242636	global	16	67062389	TSS1500;TSS1500	N_Shore	CBFB;CBFB
cg22811638	local	4	154076820	5'UTR	S_Shore	TRIM2
cg14310198	global	9	134536436	Body;Body		RAPGEF1;RAPGEF1
cg08248579	None	6	17988937	TSS1500;TSS1500;TSS1500;TSS1500	S_Shore	KIF13A;KIF13A;KIF13A;KIF13A
cg15771200	local	12	52761387	TSS200	S_Shore	KRT85
cg12149609	global	20	42816600	TSS1500;TSS1500		JPH2;JPH2
cg17656426	local	19	2137788	Body;Body	S_Shore	AP3D1;AP3D1
cg10946295	global	2	119913307		N_Shore
cg15233062	None	12	54447349	5'UTR;TSS1500	N_Shore	HOXC4;HOXC4
cg23673360	local	8	10966251	Body		XKR6
cg26874282	local	16	86274683
cg18304448	global	4	183062004	Body	N_Shore	MGC45800
cg06709756	local	8	1339049		N_Shelf
cg10716612	global	4	184113429	Body		WWC2
cg20945232	global	1	18236645
cg09258804	global	17	59532564	TSS1500	Island	TBX4
cg08471739	global	3	129312902	Body		PLXND1
cg06024391	global	7	134345134	5'UTR;5'UTR		BPGM;BPGM
cg24896021	global	8	6630930
cg02008285	global	14	97446061
cg20253542	global	7	27561082
cg13905238	global	3	197155273
cg27585822	global	20	49253552	TSS200		FAM65C
cg14313748	global	9	101498661	3'UTR		ANKS6
cg09757588	local	2	1418028	TSS200;5'UTR;TSS200;5'UTR		TPO;TPO;TPO;TPO
cg10487428	global	5	59559218	5'UTR		PDE4D
cg07756647	local	8	1441985		N_Shore
cg13164537	global	18	67624071	5'UTR;1stExon		CD226;CD226
cg13485533	global	4	86850721	Body;Body;TSS1500		ARHGAP24;ARHGAP24;ARHGAP24
cg05433490	global	16	1133247		S_Shelf
cg20687616	global	1	56883736
cg07295918	local	11	69463131	Body	S_Shore	CCND1
cg04496304	local	8	1441539		Island
cg01051581	local	5	32090639	Body		PDZD2
cg27247382	local	2	208689681	3'UTR		PLEKHM3
cg15550572	None	1	2064441	5'UTR;Body;5'UTR	N_Shore	PRKCZ;PRKCZ;PRKCZ
cg20217307	local	6	31130452	Body;Body	S_Shelf	TCF19;TCF19
cg11540771	local	3	48658831	Body		TMEM89
cg16466303	local	7	47343426	Body		TNS3
cg02528908	local	10	11505056	Body;Body	N_Shore	USP6NL;USP6NL
cg09913782	local	10	98803730	Body	S_Shore	SLIT1
cg11231069	local	2	240225142	Body		HDAC4
cg06993955	local	15	86301167		N_Shore
cg27046163	local	22	29456365	Body		C22orf31
cg17045044	local	17	40192702		S_Shore
cg21894762	local	14	73731131	Body		PAPLN
cg10798682	local	3	125820372	5'UTR;1stExon		SLC41A3;SLC41A3
cg25692669	local	5	1318258	3'UTR		CLPTM1L
cg00696685	local	8	144947335	1stExon	S_Shore	EPPK1
cg12938917	global	3	194905391	Body		C3orf21
cg21827634	local	2	217674666		N_Shore
cg00472520	local	17	79006834	Body	Island	FLJ90757
cg13393809	local	2	239974467	3'UTR	Island	HDAC4
cg04619047	local	10	1206690	Body	S_Shore	NCRNA00200
cg06762457	local	6	149806635	TSS1500		ZC3H12D
cg04989278	global	1	66839134	3'UTR;3'UTR;3'UTR;3'UTR		PDE4B;PDE4B;PDE4B;PDE4B
cg02346706	global	15	101645225
cg22876402	local	3	71553543	5'UTR;5'UTR		FOXP1;FOXP1
cg22529645	local	1	3704559	Body	S_Shore	LRRC47
cg03782381	local	17	43450670		S_Shore
cg19884937	global	6	33872665
cg26792089	local	16	28518200	TSS200		IL27
cg27007717	local	12	94251091
cg18401391	local	17	76673428	Body;Body		CYTH1;CYTH1
cg12077176	local	12	117448155	Body;Body		FBXW8;FBXW8
cg08929612	local	5	1320685	Body		CLPTM1L
cg02274236	local	7	70258649		S_Shelf
cg15021670	local	15	42386726	1stExon;5'UTR		PLA2G4D;PLA2G4D
cg07075026	None	17	47091521	Body;Body	Island	IGF2BP1;IGF2BP1
cg14519350	local	22	30661949	Body		OSM
cg26091981	local	2	136594866	TSS200		LCT
cg16552271	global	1	15392907	Body;3'UTR;3'UTR;3'UTR;3'UTR		KIAA1026;KIAA1026;KIAA1026;KIAA1026;KIAA1026
cg12601506	local	1	2017918	Body;5'UTR		PRKCZ;PRKCZ
cg00288763	global	4	154679462	Body	N_Shore	RNF175
cg03837111	global	20	44978848	3'UTR;3'UTR;3'UTR		SLC35C2;SLC35C2;SLC35C2
cg14850730	global	11	36476232	Body;Body;Body;Body		PRR5L;PRR5L;PRR5L;PRR5L
cg03450829	local	11	1772468	Body	S_Shore	HCCA2
cg08938448	global	9	139140987		N_Shore
cg15092825	global	12	93131197	5'UTR		PLEKHG7
cg14470479	global	9	34339403	Body;Body;Body		NUDT2;NUDT2;NUDT2
cg25406699	global	1	54744131	Body;Body;Body		SSBP3;SSBP3;SSBP3
cg13909381	local	1	26073062	Body		MAN1C1
cg12434898	global	17	78817642	Body;Body	N_Shore	RPTOR;RPTOR
cg15949553	global	5	141879669
cg17540450	global	13	35167000
cg13466546	global	17	77926436	Body	S_Shelf	TBC1D16
cg20035206	global	7	44199106	Body;TSS1500;TSS1500		GCK;GCK;GCK
cg21544415	global	12	26288686
cg17517997	global	1	76607010	Body;Body		ST6GALNAC3;ST6GALNAC3
cg21898299	global	15	68924220	Body		CORO2B
cg18029119	global	11	116596621
cg15727249	global	11	116693415	Body	S_Shore	APOA4
cg15595502	global	1	224564870
cg05559643	local	4	122137696	TSS200		TNIP3
cg16663155	global	11	61911154	Body;Body		INCENP;INCENP
cg01206944	global	15	26076321	Body		ATP10A
cg20111269	global	12	107972364	Body	N_Shelf	BTBD11
cg17354987	global	12	64362282	Body		SRGAP1
cg00385761	global	1	228131966	Body	N_Shelf	WNT9A
cg26817145	global	15	71807797	Body		THSD4
cg07621758	global	22	38300601		N_Shore
cg07763967	global	20	1093782	TSS200		PSMF1
cg07928191	global	4	1205359	3'UTR;3'UTR	N_Shore	CTBP1;CTBP1
cg14124376	global	20	24987139	3'UTR		ACSS1
cg09354263	global	17	73631460	Body;TSS1500;5'UTR	S_Shelf	RECQL5;LOC643008;LOC643008
cg23352712	None	5	121412970	Body	Island	LOX
cg09262269	None	5	121412429	Body	N_Shore	LOX
cg16326590	global	2	98704858	5'UTR	S_Shore	VWA3B
cg06323332	global	16	4714229	Body;Body;Body;Body		MGRN1;MGRN1;MGRN1;MGRN1
cg00749908	global	3	42243841	Body;Body	N_Shore	TRAK1;TRAK1
cg19788727	global	17	8927521	Body	S_Shore	NTN1
cg12640930	local	1	175051172	Body	S_Shelf	TNN
cg06172871	global	16	72088244	TSS1500;TSS1500		HP;HP
cg04020590	global	13	113978800	3'UTR	S_Shelf	GRTP1
cg08264297	local	1	36563430	Body		COL8A2
cg14000282	global	9	135650088	Body	S_Shelf	C9orf98
cg27180974	global	6	4932189	Body;Body;Body;Body		CDYL;CDYL;CDYL;CDYL
cg12845678	local	7	5388781	Body	N_Shelf	TNRC18
cg13869648	global	9	135755669	TSS1500;5'UTR	S_Shore	C9orf98;C9orf9
cg17916427	local	10	60473985	Body;TSS1500		BICC1;LOC728640
cg02647929	global	16	4714080	Body;Body;Body;Body		MGRN1;MGRN1;MGRN1;MGRN1
cg17611046	global	6	5672954	Body		FARS2
cg07211251	global	5	72989417	Body		RGNEF
cg09913813	global	11	126573785	Body;Body		KIRREL3;KIRREL3
cg24975821	global	15	93627558	Body;5'UTR	N_Shelf	RGMA;RGMA
cg19918599	global	3	112366281
cg13847724	global	9	126243651	Body;Body		DENND1A;DENND1A
cg15946571	global	5	167851031	Body;Body;Body		WWC1;WWC1;WWC1
cg26393354	global	11	70713937	Body		SHANK2
cg07223952	global	8	120684721
cg10626305	global	6	21801442	Body		FLJ22536
cg22032528	global	1	29472616
cg05249074	local	17	48648690	Body;Body;Body;Body;Body;Body;Body;Body;Body;Body;Body;Body;Body;Body;Body	N_Shore	CACNA1G;CACNA1G;CACNA1G;CACNA1G;CACNA1G;CACNA1G;CACNA1G;CACNA1G;CACNA1G;CACNA1G;CACNA1G;CACNA1G;CACNA1G;CACNA1G;CACNA1G
cg04421915	global	3	9234050	Body;Body		SRGAP3;SRGAP3
cg01128482	None	2	177028621	TSS200	N_Shore	HOXD3
cg19871903	global	4	105421847
cg24220733	global	12	53084709	3'UTR		KRT77
cg22914987	global	12	4054555
cg03147324	local	15	29928082
cg04470557	global	5	131630995	Body	S_Shore	SLC22A4
cg23465685	local	7	155617333
cg12182580	global	11	130514052
cg14349201	global	9	107979587
cg03822198	global	12	116997535	5'UTR		MAP1LC3B2
cg22675922	None	11	2889840	TSS1500	N_Shore	KCNQ1DN
cg18137036	local	14	89672409	Body;Body		FOXN3;FOXN3
cg22510662	global	5	36202853	Body;Body		C5orf33;C5orf33
cg23304605	global	14	91866373	Body		CCDC88C
cg00902147	global	17	76993394	Body;Body;Body	Island	CANT1;CANT1;CANT1
cg12467096	None	11	71936303	Body	Island	INPPL1
cg15685811	None	3	128998585	Body;Body	S_Shore	C3orf37;C3orf37
cg04396791	None	11	70508180	Body;TSS1500	N_Shore	SHANK2;SHANK2
cg22400291	local	6	166827151	Body;Body	S_Shore	RPS6KA2;RPS6KA2
cg22838354	local	17	78655284	Body;Body		RPTOR;RPTOR
cg01147192	None	11	69519199	TSS200	Island	FGF19
cg25134567	global	17	64782369	Body;TSS1500		PRKCA;MIR634
cg04070839	global	20	4168232	3'UTR;3'UTR;3'UTR;3'UTR		SMOX;SMOX;SMOX;SMOX
cg20345915	global	10	121296042	5'UTR;Body;1stExon		RGS10;RGS10;RGS10
cg26710347	local	6	31827226	3'UTR	N_Shelf	NEU1
cg04847830	local	16	2134079	Body;Body;Body	N_Shore	TSC2;TSC2;TSC2
cg03830490	local	3	45926669	TSS1500;TSS1500		CCR9;CCR9
cg14568259	None	9	127421654	Body;Body		NR6A1;NR6A1
cg16234726	local	14	102099176		N_Shore
cg07997493	None	17	37761947	Body	Island	NEUROD2
cg25859670	global	11	132031417	Body;Body;Body;Body		NTM;NTM;NTM;NTM
cg01341643	local	17	76472354	Body	Island	DNAH17
cg14554017	local	17	78031893	Body	N_Shore	CCDC40
cg16063587	global	6	31691227	Body;Body;Body;Body;Body;Body	N_Shore	C6orf25;C6orf25;C6orf25;C6orf25;C6orf25;C6orf25
cg12033216	global	14	59130157
cg00592695	local	8	134545685	5'UTR;5'UTR		ST3GAL1;ST3GAL1
cg11958644	global	5	130872422	Body;Body;Body;Body;Body;Body		RAPGEF6;RAPGEF6;RAPGEF6;RAPGEF6;RAPGEF6;RAPGEF6
cg16873863	local	11	2921176	5'UTR;5'UTR	N_Shelf	SLC22A18AS;SLC22A18
cg17182946	local	8	143406192	Body	N_Shore	TSNARE1
cg09198031	local	7	803939	Body	N_Shelf	HEATR2
cg05826458	None	2	111875031	Body	N_Shore	ACOXL
cg15551272	local	6	31827414	3'UTR	N_Shelf	NEU1
cg07320595	global	5	156485233	1stExon;5'UTR;5'UTR		HAVCR1;HAVCR1;HAVCR1
cg21002224	global	11	66488919	TSS200		SPTBN2
cg10118435	global	20	390551	Body;Body	S_Shore	RBCK1;RBCK1
cg10349919	local	4	845829	Body	S_Shore	GAK
cg17133446	global	22	26961427	5'UTR;TSS200		TPST2;TPST2
cg06576192	local	16	56782670	Body		NUP93
cg06039489	local	20	20037100	TSS200;5'UTR;TSS1500	S_Shelf	C20orf26;C20orf26;CRNKL1
cg06879534	local	4	39447437	Body	N_Shore	KLB
cg02780017	global	11	64981227	TSS200		SLC22A20
cg22144225	global	15	62123648
cg10494537	global	22	17700308
cg16245111	local	14	96750514	3'UTR		ATG2B
cg23358740	global	14	102198157	Body		C14orf72
cg07484910	global	16	84228377	Body;Body	S_Shelf	ADAD2;ADAD2
cg17088007	global	22	37458698	3'UTR		KCTD17
cg24965479	global	17	59216714	Body;Body		BCAS3;BCAS3
cg18247124	global	11	122943141	3'UTR		ASAM
cg10196001	local	14	96750614	3'UTR		ATG2B
cg04698020	global	19	13267436		S_Shore
cg13494126	local	7	1908745	Body;Body;Body	Island	MAD1L1;MAD1L1;MAD1L1
cg01686933	global	11	119596104	Body;Body;Body	N_Shelf	PVRL1;PVRL1;PVRL1
cg02306481	global	5	71203086
cg18659867	local	10	80007739
cg22130673	global	11	114031817	Body;Body		ZBTB16;ZBTB16
cg25561904	global	14	104165401	Body;Body;Body;Body;Body	S_Shore	XRCC3;XRCC3;XRCC3;KLC1;KLC1
cg23986143	global	7	76054256	5'UTR;TSS200		ZP3;ZP3
cg00517080	global	11	134098583	Body	S_Shelf	VPS26B
cg22766888	global	11	3188566		S_Shore
cg19043574	None	2	99439533	Body	Island	C2orf55
cg00395951	local	3	113413263	5'UTR	N_Shore	KIAA2018
cg10071186	local	14	71194292
cg12394201	global	11	43942418
cg17009616	global	22	24549738	Body	N_Shelf	CABIN1
cg00287773	global	5	139594619	Body		C5orf32
cg16290720	global	14	23848786	3'UTR;3'UTR		CMTM5;CMTM5
cg06242730	global	7	1064100	Body;Body;TSS1500;Body	S_Shore	C7orf50;C7orf50;MIR339;C7orf50
cg08870743	None	21	34398199	TSS200	Island	OLIG2
cg10824187	None	2	136874298	Body;TSS1500	Island	CXCR4;CXCR4
cg22923827	None	2	136875216	Body;TSS1500	Island	CXCR4;CXCR4
cg23404110	None	11	68609590	TSS200;TSS200	N_Shore	CPT1A;CPT1A
cg26766005	None	2	171571941	5'UTR;TSS1500;1stExon	Island	SP5;LOC440925;SP5
cg12123671	None	6	170605623		Island
cg13383019	None	3	136537856	TSS200;TSS200;TSS200	Island	TMEM22;TMEM22;TMEM22
cg07141824	None	11	9779714		Island
cg10341556	None	8	54792995	Body;TSS1500	Island	RGS20;RGS20
cg00660608	None	10	125853219		Island
cg12311057	None	2	136875897	TSS200	N_Shore	CXCR4
cg24428877	None	6	21664652		Island
cg22727304	None	6	108439520		Island
cg07013787	None	2	171572499	TSS1500;Body	Island	LOC440925;SP5
cg15767955	None	2	176965729		S_Shore
cg04651603	None	12	54321302		Island
cg19403541	None	4	174438312		Island
cg16305379	None	12	54347702	TSS1500	N_Shore	HOXC12
cg25849196	None	2	175198280		N_Shore
cg24624901	None	7	19184273		Island
cg15425541	None	14	61118751		S_Shelf
cg02000318	None	7	27197713	TSS1500	N_Shore	HOXA7
cg19188855	None	12	54355476		Island
cg18173235	None	2	119612382		N_Shore
cg12991125	None	2	160919431	TSS1500;TSS1500	S_Shore	PLA2R1;PLA2R1
cg20727434	None	5	170740547		N_Shore
cg09601912	None	2	119591144		N_Shore
cg06354392	None	2	176970064		N_Shore
cg23490887	None	6	117584596		Island
cg18103859	None	14	61110002		S_Shore
cg24686357	None	4	48272266	TSS1500	Island	TEC
cg24434800	None	1	119542295		N_Shore
cg18351329	None	2	176970508		N_Shore
cg08390877	None	2	119615998		N_Shore
cg20501518	None	3	157821919	Body;Body;Body	N_Shore	SHOX2;SHOX2;SHOX2
cg15564098	None	7	27281346	TSS1500	N_Shore	EVX1
cg25881723	local	1	181998471		N_Shore
cg23263937	None	7	27192656		N_Shore
cg08138685	None	2	119610526		N_Shore
cg13367169	None	2	119609642		N_Shore
cg21587238	None	5	42953590		S_Shore
cg27160241	global	19	10225927	Body;3'UTR	N_Shore	EIF3G;P2RY11
cg07029873	None	1	217311014	1stExon;5'UTR	Island	ESRRG;ESRRG
cg26104752	None	1	119527377	5'UTR	S_Shore	TBX15
cg25975689	None	12	54330354		N_Shelf
cg23707230	local	14	75536217	TSS200;TSS200	Island	FAM164C;FAM164C
cg26701242	None	21	38077971	Body;Body	N_Shore	SIM2;SIM2
cg21766898	None	6	50814089	3'UTR	S_Shore	TFAP2B
cg00181125	None	12	22095182		Island
cg23161999	None	2	162283189		N_Shore
cg07155223	None	1	217307696	5'UTR	N_Shore	ESRRG
cg11823511	None	1	91183697	TSS1500	Island	BARHL2
cg11254700	None	19	53561386		Island
cg05201970	None	5	45696206	5'UTR;1stExon	Island	HCN1;HCN1
cg23054189	None	1	248020692	1stExon	Island	TRIM58
cg10222027	None	16	31580590	Body	Island	CSDAP1
cg03738025	None	6	105388694		Island
cg06452665	None	13	43148436	1stExon;5'UTR;5'UTR	Island	TNFSF11;TNFSF11;TNFSF11
cg05835105	None	4	111543401	Body;Body;Body	Island	PITX2;PITX2;PITX2
cg01945793	None	7	10979586	Body	N_Shore	NDUFA4
cg23072086	global	1	21606767	TSS1500;Body;Body;Body		ECE1;ECE1;ECE1;ECE1
cg21912162	global	5	71447818	Body		MAP1B
cg08113187	global	16	87469329	Body		ZCCHC14
cg00684423	local	7	1125180	TSS1500;Body;Body;TSS1500;Body	N_Shore	GPER;C7orf50;C7orf50;GPER;C7orf50
cg11909137	global	18	46461202	Body		SMAD7
cg02277530	global	17	75396462	5'UTR;5'UTR;Body;Body;Body	N_Shore	SEPT9;SEPT9;SEPT9;SEPT9;SEPT9
cg01945793	local	7	10979586	Body	N_Shore	NDUFA4
cg04698845	local	19	578093	Body;Body;Body	Island	BSG;BSG;BSG
cg25134859	global	5	171340543	Body;Body;Body		FBXW11;FBXW11;FBXW11
cg13974464	None	19	49224165	TSS1500;Body	Island	MAMSTR;RASIP1
cg08537367	global	16	87469199	Body		ZCCHC14
cg27177779	local	7	2753825	3'UTR		AMZ1
cg15431659	global	3	194901357	Body		C3orf21
cg06460568	None	11	2162211	Body;Body;5'UTR;5'UTR;1stExon;Body	Island	IGF2AS;INS-IGF2;IGF2;IGF2;IGF2;IGF2AS
cg00585901	local	1	155035388	TSS1500;TSS1500;TSS1500	Island	EFNA4;EFNA4;EFNA4
cg18045556	local	22	39627786	Body;Body	Island	PDGFB;PDGFB
cg22412850	local	7	2754101	3'UTR	N_Shelf	AMZ1
cg10532384	local	3	141161876	Body		ZBTB38
cg19901956	local	11	77921274	Body	Island	USP35
cg04466898	local	11	65407734	5'UTR;1stExon;5'UTR	N_Shore	SIPA1;SIPA1;SIPA1
cg06869171	global	1	155949839		S_Shore
cg16409012	global	2	13024987
cg03282312	global	6	53305580
cg14381255	local	13	113437214	Body;Body	N_Shelf	ATP11A;ATP11A
cg03052162	global	12	57622963	TSS1500;TSS1500;TSS1500;TSS1500;TSS1500;TSS1500;TSS1500;TSS1500	N_Shore	SHMT2;SHMT2;SHMT2;SHMT2;SHMT2;SHMT2;SHMT2;SHMT2
cg03323067	global	2	218767655	5'UTR		TNS1
cg17803713	global	2	109873891	Body		SH3RF3
cg11408933	None	5	141191429
cg07058377	global	17	2041773	Body;Body		SMG6;SMG6
cg03214130	global	7	36088642
cg23965590	global	11	119133451	Body		CBL
cg06210783	local	11	68205335	Body	N_Shore	LRP5
cg16850690	global	3	129318459	Body		PLXND1
cg04118849	local	16	89351107	Body	N_Shore	ANKRD11
cg21506299	global	6	137105225	Body		MAP3K5
cg10288995	global	3	43332555	5'UTR;5'UTR		SNRK;SNRK
cg11263420	global	19	50019310	Body;Body	S_Shelf	FCGRT;FCGRT
cg27534520	None	15	99343918	Body		IGF1R
cg01122847	local	17	80559729	3'UTR	S_Shore	FOXK2
cg03162410	global	19	14671422	Body		TECR
cg16749930	global	11	71709978	TSS1500;5'UTR;TSS1500;5'UTR;1stExon;1stExon;TSS200		IL18BP;IL18BP;IL18BP;IL18BP;IL18BP;IL18BP;IL18BP
cg03625952	local	5	159625457	5'UTR;TSS1500		FABP6;FABP6
cg04557025	local	10	61112134	Body;5'UTR;5'UTR;Body		FAM13C;FAM13C;FAM13C;FAM13C
cg23114964	global	1	42217077	5'UTR;5'UTR		HIVEP3;HIVEP3
cg13791131	None	11	2161892	Body;Body;5'UTR;5'UTR;Body	Island	IGF2AS;INS-IGF2;IGF2;IGF2;IGF2AS
cg18396403	global	22	38615368	3'UTR		TMEM184B
cg05330668	None	14	24836090	TSS200;TSS1500	Island	NFATC4;NFATC4
cg19814309	None	19	3275998	Body	S_Shore	BRUNOL5
cg00467244	None	8	142428240		Island
cg09398550	None	3	68056976	Body	Island	FAM19A1
cg15692535	None	18	3247527	1stExon;5'UTR	Island	MYL12A;MYL12A
cg07594831	local	8	101315560	5'UTR;TSS200		RNF19A;RNF19A
cg25778304	local	13	28371682		Island
cg20648272	None	20	35068341	Body	S_Shelf	DLGAP4
cg14308424	None	9	97811026	Body	Island	C9orf3
cg16628183	None	11	126456052	Body;Body		KIRREL3;KIRREL3
cg11867607	local	10	76790371	Body		MYST4
cg04272011	None	14	79746359	Body;1stExon;1stExon;5'UTR;5'UTR	S_Shore	NRXN3;NRXN3;NRXN3;NRXN3;NRXN3
cg00286853	None	16	86528753		Island
cg23256343	global	15	30163825
cg04131583	None	16	86529961		N_Shore
cg13745946	local	14	104205299	Body	Island	PPP1R13B
cg01342926	None	4	128887246	TSS200;5'UTR	S_Shore	MFSD8;C4orf29
cg23039580	None	15	99194431	Body	Island	IGF1R
cg18950940	local	6	29580896	Body;Body;Body		GABBR1;GABBR1;GABBR1
cg08318726	None	12	114844265	TSS1500;5'UTR;5'UTR	N_Shore	TBX5;TBX5;TBX5
cg23538755	local	19	2774549	5'UTR	Island	SGTA
cg25162301	local	3	186330055	TSS1500		AHSG
cg04313875	None	17	1553202	5'UTR;1stExon	Island	RILP;RILP
cg02867882	local	16	901034		Island
cg05149386	None	11	10325809	TSS1500	N_Shore	ADM
cg06053959	None	17	1617291	Body;Body;Body;Body;TSS200	N_Shore	C17orf91;C17orf91;C17orf91;C17orf91;MIR22
cg12841513	local	10	99329961	Body	Island	UBTD1
cg21376795	local	15	86302121		Island
cg03267466	global	17	55752319	Body		MSI2
cg02076355	None	10	45474372	TSS200;Body		C10orf10;RASSF4
cg10225488	global	16	86527846		N_Shore
cg08414605	local	16	88097766	Body;Body	N_Shelf	BANP;BANP
cg25295825	local	2	237489920	Body		CXCR7
cg08551532	None	19	39998270	Body;Body	Island	DLL3;DLL3
cg16566899	local	12	57579382	Body	Island	LRP1
cg10190509	local	17	34308137	Body		CCL16
cg23239690	local	10	131505815	Body		MGMT
cg22556143	local	10	134061604	Body		STK32C
cg22082456	global	1	53392538	TSS1500;TSS1500	N_Shore	SCP2;SCP2
cg21266616	local	12	94136549	Body		CRADD
cg22082145	local	1	1597527	Body;Body;Body;Body;Body;Body;5'UTR	N_Shelf	LOC728661;CDK11B;CDK11B;CDK11B;CDK11B;CDK11B;CDK11B
cg27429220	local	2	3289427	Body	Island	TSSC1
cg13543572	local	19	2335085	Body;Body	S_Shore	SPPL2B;SPPL2B
cg20894522	local	6	17919097	Body;Body;Body;Body		KIF13A;KIF13A;KIF13A;KIF13A
cg04277056	global	21	48021941	Body	S_Shelf	S100B
cg27093273	global	18	5892213	TSS200	S_Shore	TMEM200C
cg05532325	local	2	232262773	Body	N_Shore	B3GNT7
cg08905080	global	16	89600764	Body;Body	N_Shelf	SPG7;SPG7
cg02155796	None	14	105940179	TSS1500	N_Shore	CRIP2
cg23344220	local	7	6465610	Body;Body		DAGLB;DAGLB
cg06660057	local	7	4762371	Body	N_Shelf	FOXK1
cg10393338	local	19	55798418	Body	Island	BRSK1
cg04850875	local	16	85698376	Body;Body		KIAA0182;KIAA0182
cg08900363	local	7	637454	Body;Body;Body;Body;Body;Body		PRKAR1B;PRKAR1B;PRKAR1B;PRKAR1B;PRKAR1B;PRKAR1B
cg06585203	None	6	159238500	Body;Body	N_Shore	EZR;EZR
cg25156843	global	15	89646224	5'UTR;5'UTR		ABHD2;ABHD2
cg12076147	global	2	235943546	5'UTR		SH3BP4
cg10106935	local	7	4762236	Body	N_Shelf	FOXK1
cg24506936	global	8	143535891		Island
cg19640166	None	10	106088711	5'UTR		ITPRIP
cg07317802	local	2	12880542	Body;Body		TRIB2;TRIB2
cg19477977	local	2	235599692
cg07894883	global	10	81146877	Body	S_Shore	ZCCHC24
cg09310966	local	6	41254825	TSS1500		TREM1
cg01287788	global	2	86362935	TSS200;Body		SNORD94;PTCD3
cg18261944	global	10	81200991	Body	N_Shelf	ZCCHC24
cg12983839	local	19	2334615	Body;Body	Island	SPPL2B;SPPL2B
cg20412356	global	17	80519873	Body		FOXK2
cg25350986	local	7	4762844	Body	N_Shore	FOXK1
cg04825276	global	10	529387	Body	N_Shore	DIP2C
cg12487901	global	5	140872334	Body;Body;Body;Body;Body;Body;Body;Body;Body;Body;Body;Body;Body;Body;Body;Body;Body;Body;Body;Body;Body;Body;Body;Body	Island	PCDHGA4;PCDHGC3;PCDHGA12;PCDHGA11;PCDHGA11;PCDHGA9;PCDHGA1;PCDHGB1;PCDHGB6;PCDHGB3;PCDHGB7;PCDHGA6;PCDHGA8;PCDHGA10;PCDHGA5;PCDHGB4;PCDHGC4;PCDHGA3;PCDHGA2;PCDHGA7;PCDHGB2;PCDHGC5;PCDHGB5;PCDHGC3
cg24241410	local	7	157780706	Body;Body;Body		PTPRN2;PTPRN2;PTPRN2
cg17840501	local	17	75385086	5'UTR;5'UTR;Body;Body;Body		SEPT9;SEPT9;SEPT9;SEPT9;SEPT9
cg25315148	local	12	57579596	Body	Island	LRP1
cg02592133	None	2	99526035	5'UTR		C2orf55
cg02731554	global	5	141694233	Body;Body		SPRY4;SPRY4
cg10664618	local	12	57579466	Body	Island	LRP1
cg01422249	global	5	132110968	Body;5'UTR;Body;Body	N_Shore	SEPT8;SEPT8;SEPT8;SEPT8
cg14270612	local	9	133738235	Body;Body	Island	ABL1;ABL1
cg17792192	global	9	138774526	Body		CAMSAP1
cg20668447	local	12	57579444	Body	Island	LRP1
cg20514998	local	3	66430767	Body		LRIG1
cg04169403	local	22	45098800	Body;5'UTR;Body;Body;5'UTR;Body	Island	PRR5;PRR5;PRR5;PRR5-ARHGAP8;PRR5;PRR5
cg14149007	None	19	47219555	Body;Body;1stExon	Island	PRKD2;PRKD2;PRKD2
cg08588357	local	17	78856675	Body;Body	N_Shore	RPTOR;RPTOR
cg12045829	global	17	7452926	Body;Body	S_Shore	TNFSF12;TNFSF12-TNFSF13
cg04576568	None	2	220377822	TSS1500;TSS1500	Island	ACCN4;ACCN4
cg27399034	local	2	12880639	Body;Body		TRIB2;TRIB2
cg04162299	global	7	111825813	Body		DOCK4
cg22513528	local	15	77861673
cg15352367	None	22	36236732	Body;Body;TSS200;TSS200;TSS200;TSS200		RBM9;RBM9;RBM9;RBM9;RBM9;RBM9
cg24804768	global	12	754911	Body	S_Shelf	NINJ2
cg03955927	local	2	63272232	Body;Body;Body;Body;Body	Island	LOC100132215;EHBP1;EHBP1;EHBP1;EHBP1
cg10367409	global	2	8711177
cg03147312	local	16	5078131	Body		NAGPA
cg14037652	local	10	93390387	Body	N_Shelf	PPP1R3C
cg26624673	local	8	67349092	Body	N_Shelf	ADHFE1
cg05589784	local	5	2915123
cg01052428	local	14	105802918	Body;Body		PACS2;PACS2
cg04779796	global	3	11037353	5'UTR	S_Shore	SLC6A1
cg01136606	local	8	141535901
cg26275081	local	2	8711218
cg15702277	global	1	8477935	5'UTR;Body;Body		RERE;RERE;RERE
cg13835688	local	9	130859454	Body;TSS1500;TSS1500;Body		SLC25A25;SLC25A25;SLC25A25;SLC25A25
cg14642395	local	11	64322079	TSS1500		SLC22A11
cg20795635	local	6	29578496	Body;Body;Body		GABBR1;GABBR1;GABBR1
cg26673195	global	17	41052729	TSS200		G6PC
cg19380370	local	1	36638232	Body	N_Shelf	MAP7D1
cg08515264	local	3	125878062	Body		ALDH1L1
cg20441502	None	19	35633794	TSS1500;3'UTR;3'UTR	N_Shore	FXYD7;FXYD1;FXYD1
cg25093954	local	10	2932076		Island
cg00031162	local	17	7453377	Body;Body	S_Shore	TNFSF12;TNFSF12-TNFSF13
cg20325850	global	1	56977724	Body;Body		PPAP2B;PPAP2B
cg01608788	local	22	45098907	Body;5'UTR;Body;Body;5'UTR;Body	S_Shore	PRR5;PRR5;PRR5;PRR5-ARHGAP8;PRR5;PRR5
cg10905180	None	11	4701824	3'UTR		OR51E2
cg12465250	local	6	163521043	Body;Body;Body	Island	PACRG;PACRG;PACRG
cg20794334	local	2	131797972	Body;Body	Island	ARHGEF4;ARHGEF4
cg00254017	global	5	56119093	Body		MAP3K1
cg07303091	global	12	42863385	Body;Body;Body;Body		PRICKLE1;PRICKLE1;PRICKLE1;PRICKLE1
cg07328351	global	21	48026298	TSS1500		S100B
cg00810483	global	4	3375144	Body;Body;Body	N_Shore	RGS12;RGS12;RGS12
cg21297493	global	1	156357905		N_Shore
cg04600027	global	15	89922602	Body	Island	LOC254559
cg15874113	local	6	29987762	Body		NCRNA00171
cg09264231	global	1	178056133
cg08672140	global	5	77845045	5'UTR		LHFPL2
cg07202353	global	15	42210119	Body	N_Shore	EHD4
cg07341609	global	22	37962569	Body	Island	CDC42EP1
cg02979520	None	3	48471575	TSS1500;TSS200	S_Shore	PLXNB1;PLXNB1
cg03804240	global	11	118481350	5'UTR;5'UTR;5'UTR	Island	PHLDB1;PHLDB1;PHLDB1
cg01587682	local	11	31820572	Body;Body;Body	Island	PAX6;PAX6;PAX6
cg19726192	local	4	38663646	Body	N_Shore	FLJ13197
cg07774964	local	15	65133105	TSS1500	N_Shore	PLEKHO2
cg03577460	local	14	24836084	TSS200;TSS1500	Island	NFATC4;NFATC4
cg24678869	global	1	153919638	TSS1500	S_Shore	DENND4B
cg24301247	global	12	129295649	Body		SLC15A4
cg01315067	local	10	51576232	TSS200;5'UTR;5'UTR;Body;Body	S_Shelf	NCOA4;NCOA4;NCOA4;NCOA4;NCOA4
cg15118447	local	6	159220343	Body;Body		EZR;EZR
cg16521443	local	13	114867544	Body	N_Shore	RASA3
cg21363050	global	4	55144066	Body		PDGFRA
cg22047295	global	2	175462522	5'UTR;5'UTR		WIPF1;WIPF1
cg20242280	local	17	64826184
cg16744996	global	14	70168865	Body		KIAA0247
cg06142351	global	2	8683945
cg26856257	global	1	32805350		S_Shelf
cg08908131	global	10	118706938	Body;Body		KIAA1598;KIAA1598
cg00502926	local	14	21510056	TSS1500		RNASE7
cg07911953	local	10	76345850	Body;Body		ADK;ADK
cg09100343	local	16	57147202	Body		CPNE2
cg01409343	local	17	57915740	Body		TMEM49
cg16526705	local	19	17284481	Body;Body	S_Shore	MYO9B;MYO9B
cg17463745	global	1	16554402		S_Shore
cg03626186	global	10	5882466		Island
cg10578007	global	20	23066999	TSS200		CD93
cg04279411	global	1	230645569
cg13782615	global	11	4079556	Body		STIM1
cg06778183	global	5	94129156	Body;Body		MCTP1;MCTP1
cg08903855	global	1	37056769
cg20019410	global	2	207939050
cg21638533	local	12	6658625	Body;TSS1500;Body	S_Shore	IFFO1;IFFO1;IFFO1
cg09220326	global	3	45175421	Body;Body		CDCP1;CDCP1
cg25718467	global	15	37172509	Body	Island	LOC145845
cg02974085	global	1	222990921		S_Shelf
cg14714222	global	20	47440761	Body	N_Shelf	PREX1
cg04368762	local	13	30688865		Island
cg21375869	global	15	37170554	Body	N_Shore	LOC145845
cg15100417	local	5	1728044		N_Shore
cg24028809	global	6	153414101	5'UTR		RGS17
cg20645040	local	20	45946271	Body;TSS1500;Body;Body		ZMYND8;LOC100131496;ZMYND8;ZMYND8
cg23007540	local	8	142179688	Body	N_Shelf	DENND3
cg08214927	local	14	91765824	Body		CCDC88C
cg01098939	local	7	2742274	Body	Island	AMZ1
cg13255440	local	11	120461641
cg16814786	local	10	51575763	5'UTR;5'UTR;Body;TSS1500;Body	S_Shelf	NCOA4;NCOA4;NCOA4;NCOA4;NCOA4
cg21400549	global	1	212588848	TSS1500	S_Shore	TMEM206
cg24351452	local	19	55798650	Body	Island	BRSK1
cg03699074	global	16	88849875	Body	N_Shore	FAM38A
cg19270309	local	17	77712853	3'UTR	N_Shelf	ENPP7
cg17157894	global	22	47187343	Body	N_Shelf	TBC1D22A
cg13112407	global	2	97204931	Body	S_Shore	ARID5A
cg27436940	global	17	43047115	TSS1500	N_Shore	C1QL1
cg23718201	local	8	38458540	Body		RNF5P1
cg26940620	local	16	73126608	Body		HTA
cg15231989	local	7	2742433	Body	Island	AMZ1
cg03068659	local	7	72988708	Body	N_Shelf	TBL2
cg25210609	local	1	19642293	5'UTR;5'UTR;5'UTR	S_Shelf	PQLC2;PQLC2;PQLC2
cg03293647	local	15	89849450	Body;Body		FANCI;FANCI
cg13474918	global	7	119914578	1stExon;5'UTR	N_Shore	KCND2;KCND2
cg20374118	global	2	207955221	Body		KLF7
cg12596182	local	12	70082885	Body;5'UTR;1stExon		BEST3;BEST3;BEST3
cg25132536	global	17	19152434	5'UTR;5'UTR;5'UTR		EPN2;EPN2;EPN2
cg13488556	global	15	43532047	Body;Body		TGM5;TGM5
cg04129469	global	1	18956762	TSS1500;TSS1500;TSS1500	N_Shore	PAX7;PAX7;PAX7
cg05586457	global	2	127416839	Body;Body	S_Shelf	GYPC;GYPC
cg01479396	global	17	7529693	Body;3'UTR	N_Shore	SHBG;SAT2
cg00387658	local	20	54986793	TSS1500;TSS1500;TSS1500;TSS1500		CASS4;CASS4;CASS4;CASS4
cg02586212	global	1	192544902	1stExon;5'UTR		RGS1;RGS1
cg16394018	global	11	14927549		Island
cg06627532	global	16	81491312	Body		CMIP
cg24714606	global	13	98019621	Body;Body		MBNL2;MBNL2
cg08918658	global	6	158447883	Body		SYNJ2
cg01028364	global	15	55543264	5'UTR;5'UTR;5'UTR;5'UTR		RAB27A;RAB27A;RAB27A;RAB27A
cg13787850	global	9	102195951
cg12009872	global	15	51520739	Body;Body		CYP19A1;CYP19A1
cg17416338	global	19	5074717	Body	Island	KDM4B
cg17262810	global	10	35676874	Body;5'UTR		CCNY;CCNY
cg20909017	global	12	54805345	Body		ITGA5
cg00903308	local	7	27177068		N_Shore
cg11382133	global	3	16553855	5'UTR	N_Shore	RFTN1
cg02244028	local	3	38992200	TSS200		SCN11A
cg08235970	local	1	18957023	TSS1500;TSS1500;TSS1500	Island	PAX7;PAX7;PAX7
cg13026795	global	3	16379963	Body		RFTN1
cg18366748	global	4	159131324	TSS200	N_Shore	TMEM144
cg20749059	global	3	57094404	5'UTR;TSS200		ARHGEF3;SPATA12
cg12165551	global	11	8385712
cg09897737	global	2	227509309
cg26818197	global	6	110986361	Body		CDK19
cg16402452	None	12	58129855	Body;Body	Island	AGAP2;AGAP2
cg00017271	global	17	76220743	3'UTR;3'UTR;3'UTR;Body		BIRC5;BIRC5;BIRC5;EPR1
cg10386298	global	1	221050491		Island
cg24102222	local	12	129280449	Body	Island	SLC15A4
cg18588323	global	15	51385891	Body	Island	TNFAIP8L3
cg23372684	global	5	178004685	Body	S_Shore	COL23A1
cg27148800	global	16	54325929		S_Shore
cg16131748	global	13	99959606	5'UTR;1stExon;Body;Body;Body		GPR183;GPR183;UBAC2;UBAC2;UBAC2
cg12268119	local	8	131353713	Body		ASAP1
cg25429640	global	5	176302913	Body	N_Shelf	UNC5A
cg00184457	global	8	8946301
cg20955688	local	8	133772889	1stExon;5'UTR;1stExon;5'UTR		TMEM71;TMEM71;TMEM71;TMEM71
cg15654025	local	1	165327005		S_Shore
cg12141457	local	10	126182012	Body;Body		LHPP;LHPP
cg23190089	global	11	2920209	Body;TSS1500	N_Shelf	SLC22A18AS;SLC22A18
cg16387467	global	18	72166016	TSS1500;5'UTR	S_Shore	CNDP2;CNDP2
cg04958055	global	14	69404437	Body;Body;Body		ACTN1;ACTN1;ACTN1
cg24134897	None	11	859670	5'UTR;Body;Body;Body;Body;Body;Body	S_Shore	TSPAN4;TSPAN4;TSPAN4;TSPAN4;TSPAN4;TSPAN4;TSPAN4
cg08717980	None	5	1386005		Island
cg24961583	None	3	27765409		Island
cg06237774	None	7	89748278	TSS1500	Island	DPY19L2P4
cg24280645	None	17	48636900		Island
cg13846675	local	8	53080905	Body		ST18
cg06644428	None	2	233284112		Island
cg06515159	None	21	34400659	3'UTR	S_Shore	OLIG2
cg01083689	None	1	12678206	TSS1500	Island	DHRS3
cg00535248	global	16	50588226	Body		NKD1
cg17618595	None	6	1311342	TSS1500	Island	FOXQ1
cg22778178	None	17	48041956		Island
cg16829453	None	17	48636646		Island
cg05942574	None	17	48637104	TSS1500;TSS1500;TSS1500;TSS1500;TSS1500;TSS1500;TSS1500;TSS1500;TSS1500;TSS1500;TSS1500;TSS1500;TSS1500;TSS1500;TSS1500	Island	CACNA1G;CACNA1G;CACNA1G;CACNA1G;CACNA1G;CACNA1G;CACNA1G;CACNA1G;CACNA1G;CACNA1G;CACNA1G;CACNA1G;CACNA1G;CACNA1G;CACNA1G
cg03726312	local	19	18261134	3'UTR	S_Shore	MAST3
cg22338127	None	1	209979572	TSS200	Island	IRF6
cg05440249	local	10	105209522	Body;Body	N_Shelf	CALHM2;CALHM2
cg21934190	local	8	142363160		N_Shelf
cg05634149	None	21	34395317		Island
cg05031448	global	5	173764100
cg02737738	local	7	70157145	Body;Body	N_Shore	AUTS2;AUTS2
cg17171722	local	19	34116309	5'UTR;5'UTR	S_Shore	CHST8;CHST8
cg15846641	None	2	48541264	TSS1500	Island	FOXN2
cg02523640	None	10	129534613	TSS1500	Island	FOXI2
cg19003257	local	10	134730870		N_Shore
cg22187630	None	19	13616871	1stExon;1stExon	Island	CACNA1A;CACNA1A
cg11318054	None	7	157361692	Body;Body;Body	Island	PTPRN2;PTPRN2;PTPRN2
cg16838838	None	2	85641023		Island
cg04588165	None	17	35300874		Island
cg11608147	None	4	85423065		Island
cg14500798	None	7	98100126		Island
cg17300353	None	2	137522211		N_Shore
cg12935656	local	8	21607445	Body;Body;Body	N_Shore	GFRA2;GFRA2;GFRA2
cg08150315	local	17	78858967	Body;Body	S_Shore	RPTOR;RPTOR
cg14886235	None	19	48867686	TSS1500;5'UTR;1stExon	S_Shore	TMEM143;SYNGR4;SYNGR4
cg26234081	local	7	148498614
cg19446018	None	5	64399099		Island
cg17231690	None	17	39684038	Body	Island	KRT19
cg08369872	None	22	24181191	5'UTR;1stExon;5'UTR;1stExon;1stExon;5'UTR	Island	DERL3;DERL3;DERL3;DERL3;DERL3;DERL3
cg12641240	None	8	638330	Body	S_Shore	ERICH1
cg26193694	None	7	6543354	Body	Island	GRID2IP
cg24198678	local	16	3703304	5'UTR;1stExon		DNASE1;DNASE1
cg15069295	None	2	137522461		Island
cg15571730	None	7	99680278	TSS1500;TSS1500	S_Shore	ZNF3;ZNF3
cg05337636	local	17	78720537	Body;Body	S_Shore	RPTOR;RPTOR
cg02062409	None	12	98850881		Island
cg18189994	None	15	53096816		N_Shore
cg11107212	None	7	98100224		Island
cg04895288	None	7	98099949		Island
cg24980032	local	12	132551592	Body		EP400
cg06846669	None	5	134879739		Island
cg07990749	None	10	47008316		Island
cg14186944	global	9	98335074
cg16066871	local	10	133208486
cg18907656	local	8	30888925	Body;3'UTR;1stExon		PURG;PURG;PURG
cg02215560	local	17	80791077	Body;5'UTR	S_Shore	TBCD;ZNF750
cg12202949	local	14	97089420
cg00739608	local	16	89205832	Body;Body;Body		ACSF3;ACSF3;ACSF3
cg27297993	local	6	29581228	Body;Body;Body		GABBR1;GABBR1;GABBR1
cg08443305	local	4	7043264	1stExon	N_Shore	CCDC96
cg16476700	local	7	2069840	Body;Body;Body		MAD1L1;MAD1L1;MAD1L1
cg20192464	local	3	43122694	Body	S_Shore	C3orf39
cg10728452	local	11	133791257	Body	Island	IGSF9B
cg11170479	local	14	93517493	Body;Body;Body		ITPK1;ITPK1;ITPK1
cg09222422	local	6	85132263
cg27143842	local	12	671027	3'UTR		B4GALNT3
cg03519481	local	16	55705229	Body		SLC6A2
cg23338773	local	7	44183642		N_Shore
cg27088176	global	3	196050645	3'UTR		TM4SF19
cg18250677	global	15	22980991	Body;Body	N_Shore	CYFIP1;CYFIP1
cg18763223	local	15	74334701	Body;3'UTR;Body;Body		PML;PML;PML;PML
cg05799811	local	1	167487396	Body;Body		CD247;CD247
cg19478558	local	18	44260048	Body	Island	ST8SIA5
cg14689219	None	17	58217357		Island
cg18288303	local	18	21900538	Body;TSS1500		OSBPL1A;MIR320C2
cg19101547	None	8	105236155	Body;Body	S_Shore	RIMS2;RIMS2
cg17536595	None	6	43612908	1stExon	Island	RSPH9
cg26228266	None	1	35351340	Body	Island	DLGAP3
cg12569216	local	17	78041214	Body	S_Shore	CCDC40
cg23288973	None	5	135701050	5'UTR;1stExon;1stExon;1stExon;5'UTR;5'UTR		TRPC7;TRPC7;TRPC7;TRPC7;TRPC7;TRPC7
cg05772917	global	17	44027251	5'UTR;5'UTR;5'UTR;5'UTR;5'UTR;5'UTR	S_Shore	MAPT;MAPT;MAPT;MAPT;MAPT;MAPT
cg05339942	local	17	77436163	5'UTR		HRNBP3
cg15209566	None	19	11784774	TSS200	N_Shore	ZNF833
cg06508320	None	3	179660149	Body		PEX5L
cg10835584	None	18	55108852	Body	Island	ONECUT2
cg08557970	global	6	166856094	Body;Body		RPS6KA2;RPS6KA2
cg25568066	None	5	126205045	3'UTR		MARCH3
cg27642554	None	6	146755622	3'UTR;Body	Island	GRM1;GRM1
cg08400159	None	20	45947786	Body;Body;Body;Body		ZMYND8;ZMYND8;LOC100131496;ZMYND8
cg16023581	local	17	77127605	5'UTR	Island	HRNBP3
cg06217245	None	20	33103252	TSS1500	N_Shore	DYNLRB1
cg18409528	None	2	74741136	TSS1500	Island	TLX2
cg01057176	None	2	115200247	1stExon;5'UTR		DPP10;DPP10
cg06300944	None	X	153141270	1stExon;1stExon;1stExon		L1CAM;L1CAM;L1CAM
cg00234616	None	2	74740572	TSS1500	Island	TLX2
cg13028471	None	4	139163535	TSS200		SLC7A11
cg23986578	local	1	18249536
cg03207574	None	10	25241260	Body	Island	PRTFDC1
cg14289511	None	16	24682446
cg04180868	None	10	25241462	1stExon	Island	PRTFDC1
cg07838098	None	1	228872185	Body	Island	RHOU
cg00603274	None	11	61596626	Body	Island	FADS2
cg15775674	local	15	42694733	Body;Body;Body;1stExon;Body;Body;5'UTR;Body		CAPN3;CAPN3;CAPN3;CAPN3;CAPN3;CAPN3;CAPN3;CAPN3
cg04986616	None	11	63537378	TSS1500	Island	C11orf95
cg00107606	None	2	223177596		S_Shore
cg09473745	None	10	31423550		S_Shore
cg01425666	None	7	5468436		Island
cg04971036	local	17	76887876	Body		TIMP2
cg06419761	None	10	72043661		Island
cg07734161	local	16	1593557	Body;Body	S_Shore	IFT140;TMEM204
cg15202500	local	10	78063693	Body		C10orf11
cg10021924	None	12	131401275
cg11671075	local	10	604461	Body		DIP2C
cg14701072	None	22	41075428	5'UTR;1stExon		MCHR1;MCHR1
cg20303441	global	2	25496390	Body;Body	N_Shelf	DNMT3A;DNMT3A
cg09449988	None	7	151328116	Body;Body;Body		PRKAG2;PRKAG2;PRKAG2
cg15569052	global	4	2814122	1stExon;5'UTR;5'UTR		SH3BP2;SH3BP2;SH3BP2
cg23198793	local	15	42694406	Body;Body;TSS200;Body;Body;Body;Body		CAPN3;CAPN3;CAPN3;CAPN3;CAPN3;CAPN3;CAPN3
cg23621418	None	10	75670653	TSS1500;3'UTR;TSS1500	N_Shore	PLAU;C10orf55;PLAU
cg05569109	None	2	166650805	TSS200	Island	GALNT3
cg10504392	None	12	110044639
cg02744249	local	20	57582918	TSS1500	S_Shore	CTSZ
cg09050670	global	16	1521617	Body;Body	N_Shelf	CLCN7;CLCN7
cg20474425	None	12	54746067
cg00174573	local	12	125172635
cg22999830	global	14	93532632	Body;Body;Body;TSS1500		ITPK1;ITPK1;ITPK1;NCRNA00203
cg02635407	global	4	8200549	TSS1500		SH3TC1
cg17755964	None	1	2461834	TSS200	Island	HES5
cg03443467	local	4	2813458	TSS1500;5'UTR		SH3BP2;SH3BP2
cg00537837	None	16	85363209		Island
cg23051046	None	2	223177574		S_Shore
cg08269316	None	4	174254507	Body;Body;Body	N_Shore	HMGB2;HMGB2;HMGB2
cg23907860	local	20	57583709	TSS1500	S_Shore	CTSZ
cg17928286	local	1	205414220
cg11288260	global	13	100117058
cg03910065	None	11	115372874	Body;Body	N_Shore	CADM1;CADM1
cg20664636	global	17	1959596	TSS200;5'UTR	Island	HIC1;HIC1
cg20484086	global	1	227015727
cg03646261	global	2	45235408	Body	N_Shore	SIX2
cg17518842	global	1	209943131	Body		TRAF3IP3
cg27381488	global	16	66300611		N_Shelf
cg15551096	global	6	166901788	Body;Body		RPS6KA2;RPS6KA2
cg23416081	global	6	35693573	5'UTR	N_Shelf	FKBP5
cg27400746	global	16	89904261	Body	S_Shelf	SPIRE2
cg09570214	global	12	110326108
cg19090437	global	4	38080799	Body		TBC1D1
cg20249584	None	1	233462803	TSS1500	N_Shore	KIAA1804
cg07816687	None	16	67197186	TSS200;TSS200;Body	Island	HSF4;HSF4;FBXL8
cg19357999	local	12	121661762	Body		P2RX4
cg19039673	global	6	90887871	5'UTR;5'UTR		BACH2;BACH2
cg05226168	local	16	68118441	TSS1500;TSS1500;TSS1500;TSS1500	N_Shore	NFATC3;NFATC3;NFATC3;NFATC3
cg10944833	global	6	17702460	Body	N_Shelf	NUP153
cg13780616	global	1	29769702
cg27587257	local	11	1002310	Body		AP2A2
cg26272879	local	6	1766567	Body		GMDS
cg21858320	local	2	3483007	Body		TTC15
cg07567256	local	6	163757048
cg14893129	local	17	78152051	TSS1500	N_Shelf	CARD14
cg03521774	global	8	81478172
cg18843739	global	2	192712530	TSS1500		SDPR
cg23707540	global	10	126836038	5'UTR;5'UTR	N_Shelf	CTBP2;CTBP2
cg26689203	global	4	120061211	Body		MYOZ2
cg17300736	None	11	2162475	Body;Body;5'UTR;Body;TSS200	Island	IGF2AS;INS-IGF2;IGF2;IGF2AS;IGF2
cg17639265	None	6	35887853	Body	N_Shore	SRPK1
cg03030717	None	12	65218069		N_Shore
cg14019323	None	12	65218413		Island
cg13601435	None	9	120507431		Island
cg08325383	None	11	65190187	TSS200	Island	NEAT1
cg08920121	None	1	159824086	Body	Island	C1orf204
cg20555507	None	9	73736452	5'UTR;1stExon		TRPM3;TRPM3
cg22814884	None	11	66360803	TSS1500;Body	Island	CCDC87;CCS
cg10017888	None	19	47105860	Body	S_Shore	CALM3
cg08557928	None	15	76440443	Body		C15orf27
cg14872693	None	11	65190203	TSS200	Island	NEAT1
cg06728260	None	19	45826917	TSS1500	Island	CKM
cg14235811	None	9	37903063	5'UTR;Body;Body	N_Shore	MCART1;MCART1;MCART1
cg15079315	None	20	4981089	5'UTR;5'UTR		SLC23A2;SLC23A2
cg26883840	global	8	36942104
cg05829479	None	6	49518079	TSS200	N_Shore	C6orf141
cg04932840	None	17	34077141	Body		GAS2L2
cg26284638	None	5	10355326	Body	S_Shore	MARCH6
cg24453580	None	12	49691064	Body	Island	PRPH
cg27271486	None	16	56227690	Body;Body;Body	S_Shore	DKFZP434H168;GNAO1;GNAO1
cg09486902	None	12	65219478		S_Shore
cg08171206	None	1	18971872	Body;Body;Body	Island	PAX7;PAX7;PAX7
cg15549973	None	1	159823687	Body	N_Shore	C1orf204
cg10850725	None	19	44764380	5'UTR	S_Shore	ZNF233
cg13367647	None	1	155213714	5'UTR;5'UTR;5'UTR;5'UTR		GBA;GBA;GBA;GBA
cg18329187	None	14	103989711	TSS1500	Island	CKB
cg09735465	None	9	120507228		Island
cg02513485	None	2	54682387	TSS1500	N_Shore	SPTBN1
cg23986772	None	8	24858570		S_Shore
cg01991180	None	11	108092276	TSS1500;Body	N_Shore	ATM;NPAT
cg02611240	None	12	72149634	Body	S_Shore	RAB21
cg21990144	None	2	201726666	5'UTR;Body;Body;Body	N_Shelf	CLK1;CLK1;CLK1;CLK1
cg23833896	None	8	1711046	TSS1500	N_Shore	CLN8
cg20884984	None	11	119292770	5'UTR	Island	THY1
cg00087417	None	6	35887678	Body	N_Shore	SRPK1
cg03307401	None	19	51568260	Body	Island	KLK13
cg05979484	None	7	55432630	TSS1500	N_Shore	LANCL2
cg12267021	None	11	71790932	5'UTR;TSS1500;TSS1500;TSS1500;TSS1500;TSS1500;TSS1500	N_Shore	NUMA1;LRTOMT;LRTOMT;LRTOMT;LRTOMT;LRTOMT;LRTOMT
cg00192136	None	11	20178496	Body	Island	DBX1
cg06710672	global	16	1133378		S_Shelf
cg01055954	local	2	239312601
cg15895391	local	5	14463177	Body	S_Shore	TRIO
cg07407754	local	11	73720406	TSS200;TSS200		UCP3;UCP3
cg06500883	local	9	18776940	Body	Island	ADAMTSL1
cg07241084	global	7	47493388	5'UTR		TNS3
cg20872422	local	2	239312497
cg01390479	local	2	240032032	Body	N_Shore	HDAC4
cg23934404	None	13	112758491		N_Shore
cg27598340	local	7	55145727	Body;Body;Body;Body		EGFR;EGFR;EGFR;EGFR
cg00245896	local	4	8034100	Body;Body;Body;Body;Body;Body;Body		ABLIM2;ABLIM2;ABLIM2;ABLIM2;ABLIM2;ABLIM2;ABLIM2
cg07315051	local	2	240065559	Body	S_Shelf	HDAC4
cg16694631	local	14	93522787	Body;Body;Body		ITPK1;ITPK1;ITPK1
cg17947242	local	19	49183499	Body	Island	SEC1
cg20797106	local	7	158113804	Body;Body;Body	S_Shelf	PTPRN2;PTPRN2;PTPRN2
cg25566285	local	7	158114605	Body;Body;Body	S_Shelf	PTPRN2;PTPRN2;PTPRN2
cg21573359	local	1	220132728
cg08425678	local	1	14029478	5'UTR	S_Shelf	PRDM2
cg26613312	local	18	59482723	3'UTR		RNF152
cg00027570	global	1	117306669	Body		CD2
cg27129144	local	17	78848533	Body;Body	N_Shore	RPTOR;RPTOR
cg24796546	global	7	4133359	Body		SDK1
cg10122877	local	4	37585361	TSS1500;5'UTR		C4orf19;C4orf19
cg16656469	local	12	132504885	Body		EP400
cg11111332	local	7	50612853	5'UTR;5'UTR		DDC;DDC
cg03652336	global	4	141017399	Body		MAML3
cg04190037	local	13	113105962		N_Shore
cg14580853	local	6	136680107	Body	N_Shore	MAP7
cg00221794	local	2	20776620
cg14948436	local	6	39290159	1stExon;1stExon;1stExon;1stExon		KCNK16;KCNK16;KCNK16;KCNK16
cg21354781	global	6	164029556
cg13705216	local	11	17599691
cg06617879	local	17	78849431	Body;Body	Island	RPTOR;RPTOR
cg05230389	local	1	220132091
cg05779364	local	1	220132137
cg08550517	local	16	85414644
cg19353431	local	6	170578785		S_Shore
cg11269166	global	2	172203847	Body		METTL8
cg00465413	local	20	61288142	Body	Island	SLCO4A1
cg23119026	global	2	20776830
cg09893465	local	10	134588040	Body	S_Shore	INPP5A
cg16371080	local	4	3309069		N_Shore
cg04041447	None	13	52702431	5'UTR	N_Shore	NEK5
cg05401764	None	3	157815808	3'UTR;3'UTR;3'UTR	Island	SHOX2;SHOX2;SHOX2
cg19809942	None	11	59324029
cg12629689	local	1	45803944	5'UTR;Body;Body;TSS1500;Body;5'UTR;5'UTR	N_Shore	MUTYH;MUTYH;MUTYH;TOE1;MUTYH;MUTYH;MUTYH
cg18539325	global	21	39493489	TSS200;TSS200;TSS200;TSS200;TSS200;TSS200		DSCR8;DSCR8;DSCR8;DSCR4;DSCR8;DSCR8
cg20942867	None	1	27426144	3'UTR		SLC9A1
cg15251242	local	1	62900629	TSS1500;TSS1500	N_Shore	USP1;USP1
cg13964439	global	9	90278260	Body	S_Shelf	DAPK1
cg00539322	local	2	234216360	1stExon;5'UTR		SAG;SAG
cg05789595	global	6	56555274	Body;Body;Body;Body		DST;DST;DST;DST
cg07393734	None	11	44341451		Island
cg04462652	None	2	133429088	TSS1500;TSS200	S_Shore	LYPD1;LYPD1
cg14600368	global	1	203578680
cg02045569	global	3	69060060	5'UTR	N_Shelf	C3orf64
cg03899654	global	21	45361964	5'UTR;5'UTR	N_Shore	AGPAT3;AGPAT3
cg02379533	global	5	154214618	Body		C5orf4
cg07021181	global	11	122853573	TSS1500	N_Shore	BSX
cg05232857	local	6	33867321
cg01850449	None	2	133428510	TSS200;5'UTR	Island	LYPD1;LYPD1
cg18119407	global	2	201980504	TSS1500;TSS1500	N_Shore	CFLAR;CFLAR
cg14206651	global	1	41658104	5'UTR		SCMH1
cg02828785	global	12	12846546	5'UTR	N_Shelf	GPR19
cg12850473	global	2	148122525
cg00706570	local	18	74692116	3'UTR;3'UTR;3'UTR;3'UTR;3'UTR	S_Shore	MBP;MBP;MBP;MBP;MBP
cg21307723	global	1	245215135	Body;Body;Body;Body;Body		EFCAB2;EFCAB2;EFCAB2;EFCAB2;EFCAB2
cg07840332	global	17	7960092
cg00654657	local	1	99728691	TSS1500;TSS1500	N_Shore	LPPR4;LPPR4
cg18888464	None	14	76597657		Island
cg08710564	global	11	8829438	5'UTR;5'UTR;5'UTR		ST5;ST5;ST5
cg25455811	global	5	77072789	TSS1500	S_Shore	TBCA
cg14545159	global	17	41479473		S_Shore
cg09829263	global	13	49066969	Body		RCBTB2
cg00151250	global	8	91803412	TSS1500	N_Shore	NECAB1
cg19465124	global	4	184344219
cg25086840	local	3	121286820	1stExon;5'UTR		ARGFX;ARGFX
cg15923688	global	17	79623755	TSS200;TSS200		PDE6G;PDE6G
cg15716680	local	11	12864037	Body		TEAD1
cg08065092	local	12	104743690	3'UTR;3'UTR;3'UTR;3'UTR;3'UTR		TXNRD1;TXNRD1;TXNRD1;TXNRD1;TXNRD1
cg27285968	local	14	89059888	TSS1500;Body;Body;Body;Body;Body		ZC3H14;ZC3H14;ZC3H14;ZC3H14;ZC3H14;ZC3H14
cg00995582	local	8	145257139	Body;Body;Body	N_Shore	HEATR7A;HEATR7A;HEATR7A
cg24150623	None	11	121971092	TSS1500;Body		MIR125B1;LOC399959
cg16052317	None	15	99789855	TSS200;TSS200;TSS200;TSS200;TSS200;TSS200;TSS200	N_Shore	TTC23;TTC23;TTC23;TTC23;TTC23;TTC23;TTC23
cg08218486	local	14	89060821	1stExon;Body;Body;Body;Body;Body;5'UTR		ZC3H14;ZC3H14;ZC3H14;ZC3H14;ZC3H14;ZC3H14;ZC3H14
cg25761326	None	10	11206792	TSS200;Body;Body;TSS200	N_Shore	CUGBP2;CUGBP2;CUGBP2;CUGBP2
cg03607054	local	2	24259920	Body;Body		C2orf44;C2orf44
cg13554575	local	9	997475		N_Shore
cg18417953	None	18	55097461		S_Shore
cg18930863	local	11	117389197	Body	Island	DSCAML1
cg01442565	local	21	43787747	TSS1500		TFF1
cg03069943	local	17	36874779	Body		MLLT6
cg20568219	local	6	151671320	Body;Body		AKAP12;AKAP12
cg21575634	local	12	131310417	Body;Body		STX2;STX2
cg17176732	None	8	107669856	TSS200;Body	Island	OXR1;OXR1
cg20452212	None	1	26737797	Body	Island	LIN28
cg16192707	None	6	99292347		N_Shore
cg07505515	local	16	67309957	TSS1500	N_Shelf	PLEKHG4
cg17726720	global	8	1589165	Body	N_Shore	DLGAP2
cg13860981	global	9	19104008	TSS1500	S_Shore	HAUS6
cg02354388	global	4	185362534	5'UTR		IRF2
cg25316663	None	4	147569938
cg00420450	global	8	22132641	TSS200;TSS1500	N_Shore	PIWIL2;PIWIL2
cg06145508	local	10	116418797	Body;TSS1500;Body		ABLIM1;ABLIM1;ABLIM1
cg26607228	global	10	43889109	5'UTR;5'UTR;5'UTR;5'UTR;5'UTR;5'UTR	N_Shelf	HNRNPF;HNRNPF;HNRNPF;HNRNPF;HNRNPF;HNRNPF
cg25950325	None	4	41753712		Island
cg18603787	local	12	133053208		S_Shore
cg18573884	local	12	51639577	3'UTR;3'UTR;Body		SMAGP;SMAGP;DAZAP2
cg23116670	local	14	102493911	Body		DYNC1H1
cg08048687	local	2	111996799
cg04252689	local	19	52210193		S_Shelf
cg27457921	global	17	43976811	5'UTR;5'UTR;5'UTR;5'UTR;5'UTR;5'UTR	S_Shore	MAPT;MAPT;MAPT;MAPT;MAPT;MAPT
cg09915232	local	8	1879280	Body		ARHGEF10
cg19957162	global	2	208631259	3'UTR	N_Shore	FZD5
cg15819128	global	2	238604020	Body;Body;Body;Body;Body	S_Shelf	LRRFIP1;LRRFIP1;LRRFIP1;LRRFIP1;LRRFIP1
cg20697464	global	2	218793716	5'UTR		TNS1
cg04685228	global	5	172462626
cg02483931	global	17	34202461	Body		CCL5
cg14181956	global	14	93532563	Body;Body;Body;TSS1500		ITPK1;ITPK1;ITPK1;NCRNA00203
cg21764632	local	7	5270553	Body;Body;Body;Body;Body	S_Shelf	WIPI2;WIPI2;WIPI2;WIPI2;WIPI2
cg19448837	global	18	48085671	TSS1500	N_Shore	MAPK4
cg09203501	global	7	5271545	3'UTR;3'UTR;3'UTR;3'UTR;3'UTR	S_Shelf	WIPI2;WIPI2;WIPI2;WIPI2;WIPI2
cg18728753	None	12	116714066	Body		MED13L
cg13078381	None	12	115137528		N_Shore
cg07133729	local	7	98977840	5'UTR		ARPC1B
cg12510458	None	12	115138058		Island
cg15015757	local	5	43043140	Body	Island	LOC153684
cg06512263	global	6	20709867	Body		CDKAL1
cg05226008	global	8	13372132	1stExon;1stExon;5'UTR;5'UTR		DLC1;DLC1;DLC1;DLC1
cg04159215	global	10	126182324	Body;Body		LHPP;LHPP
cg02667577	local	7	5270567	Body;Body;Body;Body;Body	S_Shelf	WIPI2;WIPI2;WIPI2;WIPI2;WIPI2
cg06640279	global	1	207095153	Body;Body;Body		FAIM3;FAIM3;FAIM3
cg18759102	global	1	3100343	Body;Body	N_Shelf	PRDM16;PRDM16
cg26648203	global	2	45159457		N_Shore
cg10902396	global	7	29283532	Body		CHN2
cg12815355	global	2	75894077	Body		C2orf3
cg25106645	None	12	115135560		N_Shore
cg02158486	global	18	48085692	TSS1500	N_Shore	MAPK4
cg02930866	global	3	15482580	3'UTR		EAF1
cg26607673	global	1	3473923	Body		MEGF6
cg23702610	global	15	100017287
cg25058482	global	2	161993315	TSS200;TSS200		TANK;TANK
cg21147364	local	14	64679772	Body;Body;TSS1500		SYNE2;SYNE2;SYNE2
cg06191260	global	18	48088362	5'UTR	S_Shore	MAPK4
cg16810605	global	8	65283263		S_Shore
cg22171993	global	5	81818816
cg08913523	global	8	126649807
cg24687805	global	15	55513621	Body;Body;Body;Body		RAB27A;RAB27A;RAB27A;RAB27A
cg15490643	global	2	44935276	Body		C2orf34
cg04306926	global	20	30126382	3'UTR;Body;Body;Body		HM13;HM13;HM13;HM13
cg10484958	None	13	53424127	TSS1500;TSS1500	N_Shore	PCDH8;PCDH8
cg02458188	global	15	60966344	Body		RORA
cg13575885	local	12	132406623	3'UTR		ULK1
cg23947919	global	12	132406608	3'UTR		ULK1
cg20122488	global	17	17396436	3'UTR	N_Shore	MED9
cg15099397	global	13	110761577
cg19117047	global	5	173828840
cg02580626	global	22	18572133	3'UTR;3'UTR		PEX26;PEX26
cg23541975	global	17	75143184	Body;Body;Body;Body		SEC14L1;SEC14L1;SEC14L1;SEC14L1
cg17175208	None	1	6241179	TSS1500	Island	CHD5
cg18238908	local	1	33893978		N_Shelf
cg18037808	global	12	109059679	Body		CORO1C
cg01578293	global	4	41400597	Body;Body;Body		LIMCH1;LIMCH1;LIMCH1
cg24182521	None	20	44541013	TSS1500;TSS1500	S_Shore	PLTP;PLTP
cg08336425	None	12	125140167
cg27377863	None	19	16189693	Body;Body	S_Shore	TPM4;TPM4
cg10366093	None	11	57414457	Body	Island	YPEL4
cg25014026	global	8	73735989	Body		KCNB2
cg18693051	global	19	1161800	5'UTR	N_Shore	SBNO2
cg11646638	global	2	24303986	Body;Body	N_Shelf	TP53I3;TP53I3
cg26336059	None	1	153958977	TSS200		RAB13
cg25315503	local	21	45247038		S_Shore
cg21560142	None	19	47730821	Body;Body;Body;Body	N_Shore	BBC3;BBC3;BBC3;BBC3
cg09077096	local	7	3033798	5'UTR		CARD11
cg15234492	None	12	122019076	TSS200;TSS1500	S_Shore	KDM2B;KDM2B
cg01553935	global	1	46641061	1stExon;5'UTR		TSPAN1;TSPAN1
cg26160839	global	1	168250119	TSS200		TBX19
cg07349208	None	4	111532679		Island
cg23424125	local	8	1494546	5'UTR	N_Shore	DLGAP2
cg11796181	global	5	142422241	Body;Body		ARHGAP26;ARHGAP26
cg04159878	global	1	110179127
cg21019662	global	12	107176420	Body		RIC8B
cg25327343	global	8	120221797	Body	S_Shore	MAL2
cg10168494	global	3	187635183
cg14288281	None	1	1093457		Island
cg00525011	None	16	122031	5'UTR	Island	RHBDF1
cg19605931	global	18	8662653		S_Shelf
cg01638101	local	2	74612812	TSS200		LOC100189589
cg23873200	local	7	2626189	Body;Body		IQCE;IQCE
cg03852847	global	2	233439513
cg12627354	None	11	46940434	TSS1500	S_Shore	LRP4
cg20039048	None	11	8305302
cg13914004	None	9	130659670	Body	N_Shore	ST6GALNAC6
cg10768108	None	3	181433507	Body	N_Shelf	SOX2OT
cg01223193	global	15	89002822	3'UTR		MRPL46
cg07507251	None	3	52567010	Body;Body	Island	NT5DC2;NT5DC2
cg14567593	local	19	13265338	3'UTR	N_Shore	IER2
cg09560658	global	4	106969512	Body;Body;Body;Body		TBCK;TBCK;TBCK;TBCK
cg00523012	None	19	13264324	Body	Island	IER2
cg02853418	global	9	127247965	Body	N_Shore	NR5A1
cg16046493	global	3	58551954	3'UTR;3'UTR		FAM107A;FAM107A
cg01399219	None	7	44145110	Body		AEBP1
cg06224721	global	2	74612020	TSS1500		LOC100189589
cg08288130	local	8	21771540	TSS1500	S_Shore	DOK2
cg12652780	global	11	70178166	Body;Body		PPFIA1;PPFIA1
cg16788099	None	11	67141792	Body;TSS1500;TSS200	S_Shore	LOC100130987;CLCF1;CLCF1
cg02231066	None	3	52567130	Body;Body	Island	NT5DC2;NT5DC2
cg16451661	None	3	128274597		Island
cg15138473	global	6	83757182	Body		UBE2CBP
cg12614148	global	1	118325026
cg06917265	global	14	24001957
cg03653317	local	1	118165598	Body		FAM46C
cg13476133	None	7	44185646	Body;Body;Body	Island	GCK;GCK;GCK
cg25181284	global	12	50497037	TSS1500		GPD1
cg07684310	local	16	70504393	Body	N_Shelf	FUK
cg18051552	global	6	71548732	Body;Body		SMAP1;SMAP1
cg26337070	None	2	85999873	Body		ATOH8
cg05037389	None	1	150230233	1stExon;5'UTR		CA14;CA14
cg02633413	None	5	176238343	Body	S_Shore	UNC5A
cg00041599	None	5	176240038	Body	S_Shore	UNC5A
cg06573254	global	5	174909270	5'UTR	S_Shelf	SFXN1
cg00159523	None	10	114713187	Body;Body;Body;Body;Body;Body	S_Shore	TCF7L2;TCF7L2;TCF7L2;TCF7L2;TCF7L2;TCF7L2
cg15413702	global	11	34124180		N_Shelf
cg00484122	local	2	20579065
cg16960943	local	2	236417185	Body;Body		AGAP1;AGAP1
cg01246398	global	3	123165872	Body	N_Shore	ADCY5
cg19416795	global	18	76270967
cg25961952	global	5	134523470		N_Shelf
cg11341711	None	19	47290532	Body;5'UTR;1stExon	N_Shore	SLC1A5;SLC1A5;SLC1A5
cg00780456	global	8	92046216	Body		TMEM55A
cg15836733	global	15	42875249	Body	S_Shore	STARD9
cg16799926	local	14	70546695	Body;1stExon;1stExon;Body;5'UTR;Body;Body;5'UTR		SLC8A3;SLC8A3;SLC8A3;SLC8A3;SLC8A3;SLC8A3;SLC8A3;SLC8A3
cg12773394	None	4	5892965	Body	N_Shore	CRMP1
cg13559235	local	9	134714915		N_Shelf
cg01266916	None	20	44642788	Body	Island	MMP9
cg10857203	local	4	166307422	Body;Body		MIR578;CPE
cg06169041	local	4	166306860	TSS1500;Body		MIR578;CPE
cg00728503	local	4	166307614	Body		CPE
cg01043669	local	3	72786069		N_Shelf
cg03771282	local	2	198062750	5'UTR;1stExon		ANKRD44;ANKRD44
cg08905701	local	5	35232164	TSS1500		PRLR
cg23459209	local	2	232321889	Body;TSS1500;TSS1500		NCL;SNORD20;SNORA75
cg04112495	local	2	74693876	TSS1500;TSS1500	S_Shore	MOGS;MOGS
cg26548718	local	19	46292479	Body	N_Shelf	DMWD
cg03564730	local	2	310099		S_Shore
cg01636873	global	13	111281479	Body	S_Shelf	CARKD
cg18397653	local	4	88571653	5'UTR;5'UTR		DMP1;DMP1
cg21889691	local	7	132435910
cg02138806	local	2	151730502
cg12880685	global	10	120489658	Body		C10orf46
cg26312185	local	2	28610809		N_Shelf
cg14685356	local	6	152639548	Body;TSS200;Body		SYNE1;SYNE1;SYNE1
cg00536472	local	18	73000758	3'UTR	S_Shore	TSHZ1
cg09621472	global	3	113439314	3'UTR		NAA50
cg05095252	global	2	150308042	Body		LYPD6
cg23251296	global	17	62011014	TSS1500;TSS1500;TSS1500		CD79B;CD79B;CD79B
cg00594228	local	14	101522431	TSS200		MIR453
cg02671171	global	17	203087	TSS1500	N_Shelf	RPH3AL
cg00143527	global	15	81292171	TSS1500	N_Shore	MESDC1
cg19035075	local	7	4736276	Body		FOXK1
cg25072262	local	17	78336438	Body;Body		RNF213;LOC100294362
cg00980904	global	3	50373735	Body;Body;Body;5'UTR	N_Shore	RASSF1;RASSF1;RASSF1;RASSF1
cg00899463	global	4	108784393	5'UTR		SGMS2
cg05543492	global	2	151484439
cg05445187	local	17	80890588	Body	S_Shore	TBCD
cg16756442	global	12	49346866	5'UTR	N_Shelf	ARF3
cg14196011	local	17	57759682	Body		CLTC
cg01554357	global	1	164750454	Body		PBX1
cg05463136	global	3	16286371
cg16051718	global	4	6857986	Body;Body		KIAA0232;KIAA0232
cg02584377	local	12	122489545	Body;Body		BCL7A;BCL7A
cg13827209	global	9	101912842	3'UTR;3'UTR		TGFBR1;TGFBR1
cg10732536	local	4	141543110	3'UTR		TBC1D9
cg17024523	global	3	37038591	5'UTR;Body;5'UTR;5'UTR	S_Shelf	MLH1;MLH1;MLH1;MLH1
cg05797615	global	1	220925515	Body	S_Shelf	MOSC2
cg04574732	global	1	179199939	TSS1500;TSS1500;TSS1500;TSS1500;TSS1500	S_Shore	ABL2;ABL2;ABL2;ABL2;ABL2
cg07978738	global	10	116298339	Body;Body;Body		ABLIM1;ABLIM1;ABLIM1
cg11534481	global	7	127496578	Body		SND1
cg22260869	global	15	92398112	Body;Body	S_Shore	SLCO3A1;SLCO3A1
cg11337160	local	22	36014182	TSS1500;TSS1500;5'UTR		MB;MB;MB
cg23888440	global	18	29268737		S_Shelf
cg23928468	local	2	27433191	5'UTR;Body	N_Shore	SLC5A6;SLC5A6
cg21411705	global	6	138747752	Body;Body	S_Shelf	NHSL1;NHSL1
cg07735969	global	16	68418473	5'UTR		SMPD3
cg14147151	global	9	138948000	5'UTR	S_Shelf	NACC2
cg00860090	global	1	226832000	Body	S_Shelf	ITPKB
cg09230938	global	3	183722448	Body;Body		ABCC5;ABCC5
cg16248515	global	3	156840234		S_Shore
cg22729539	global	12	122519119	Body	S_Shore	MLXIP
cg02143988	global	8	32785240
cg06314969	local	15	31357535	TSS200;Body		MIR211;TRPM1
cg15081402	global	3	64433470		S_Shelf
cg04682699	global	3	50248845	5'UTR		SLC38A3
cg26841013	None	1	228248013	3'UTR	S_Shore	WNT3A
cg17805199	global	1	9310257	Body		H6PD
cg02769951	local	6	130758149	TSS200		TMEM200A
cg01810416	local	5	33501457		N_Shore
cg12587930	global	20	4702464	TSS200		PRND
cg15206473	global	6	35049613	Body		ANKS1A
cg18836745	global	11	119212247	5'UTR;3'UTR	S_Shore	C1QTNF5;MFRP
cg18031151	global	X	106142458	TSS1500		CLDN2
cg02752014	global	6	76045920	Body		FILIP1
cg07056138	global	8	103120260	5'UTR;5'UTR;5'UTR;5'UTR;5'UTR;5'UTR;5'UTR		NCALD;NCALD;NCALD;NCALD;NCALD;NCALD;NCALD
cg13460556	global	15	89709638	Body;Body		ABHD2;ABHD2
cg14556677	global	9	127054428	TSS1500;5'UTR;5'UTR;5'UTR;5'UTR;Body;5'UTR		NEK6;NEK6;NEK6;NEK6;NEK6;NEK6;NEK6
cg16376816	global	5	163924998
cg20445774	global	6	33400021	Body	S_Shelf	SYNGAP1
cg20260028	local	15	31358057	TSS1500;Body		MIR211;TRPM1
cg24916358	global	10	126315761	Body		FAM53B
cg16337763	global	11	11438208	Body		GALNTL4
cg18838431	global	11	74178800	TSS1500	Island	KCNE3
cg16651877	global	1	45276338	Body	N_Shelf	BTBD19
cg09362366	global	3	159710706	Body	S_Shelf	IL12A
cg20951255	global	7	131291256
cg23104439	global	14	54412780		N_Shore
cg00470768	global	15	41285147	Body		INO80
cg00280270	global	22	21320131	5'UTR;5'UTR;TSS1500;TSS1500	S_Shore	AIFM3;AIFM3;AIFM3;AIFM3
cg27097542	global	16	11706435
cg06588876	global	9	139009275	5'UTR	N_Shore	C9orf69
cg25165932	global	12	109025846	5'UTR		SELPLG
cg25027367	global	17	63100218		S_Shelf
cg08132072	global	12	98614401
cg11964773	local	1	14924077	TSS1500;TSS1500	N_Shore	KIAA1026;KIAA1026
cg21138405	global	5	131827807	TSS1500	S_Shore	IRF1
cg11947423	local	8	42329660	Body		SLC20A2
cg05591210	global	11	74179054	TSS1500	S_Shore	KCNE3
cg15172543	None	18	56936882	Body	S_Shore	RAX
cg12668523	global	21	46851112	Body	S_Shore	COL18A1
cg14155397	None	15	66678782	TSS1500	N_Shore	MAP2K1
cg18368411	None	1	31845959	TSS200		FABP3
cg08160224	global	11	62248459	Body		AHNAK
cg16839921	global	11	74178883	TSS1500	S_Shore	KCNE3
cg08949974	global	4	40632860	TSS1500	S_Shore	RBM47
cg20635389	global	2	207859049
cg16627346	global	2	96057706		S_Shelf
cg09680149	global	12	6487052	TSS1500		SCNN1A
cg24173753	global	3	73529447	Body		PDZRN3
cg24461171	global	1	197745025	TSS1500;TSS1500	S_Shore	DENND1B;DENND1B
cg11011913	global	3	149051159	Body		TM4SF18
cg25050723	local	11	1777552	Body;Body	S_Shelf	HCCA2;CTSD
cg05038288	global	17	41800491		S_Shelf
cg08303550	global	7	4347708		Island
cg13241645	global	3	52235959	Body;Body	S_Shelf	ALAS1;ALAS1
cg21222007	global	9	38055200	Body		SHB
cg27602263	None	18	56936434	Body	Island	RAX
cg17868893	global	2	201217491	5'UTR;5'UTR;5'UTR;5'UTR		SPATS2L;SPATS2L;SPATS2L;SPATS2L
cg14381712	global	1	12546623	Body;Body		VPS13D;VPS13D
cg01239154	local	20	30776159		N_Shore
cg16405454	global	11	113258223	TSS1500	N_Shore	ANKK1
cg15844419	global	21	46850665	Body	Island	COL18A1
cg22037648	None	3	50311009	Body;Body	Island	SEMA3B;SEMA3B
cg10136560	None	4	140737518	Body		MAML3
cg22391718	global	1	110326285
cg12339202	global	2	12342503
cg17018349	global	15	68136196		S_Shelf
cg25875953	global	1	3001128	Body;Body	S_Shore	PRDM16;PRDM16
cg02340615	global	12	104617058	Body		TXNRD1
cg25779645	local	20	42965025	TSS1500		R3HDML
cg14469019	None	5	35925230	5'UTR;5'UTR		CAPSL;CAPSL
cg25967170	global	12	67127781
cg09373727	local	1	32405360	TSS1500;TSS1500	S_Shore	PTP4A2;PTP4A2
cg14510641	global	20	35879597	3'UTR		GHRH
cg12851717	local	13	100517009	Body		CLYBL
cg02650080	global	3	194801513	Body		C3orf21
cg05471509	local	13	114109420
cg23209990	None	4	55097576	5'UTR	Island	PDGFRA
cg09896412	None	1	98519101		Island
cg15056128	None	17	38821487	TSS200		KRT222
cg08726298	None	5	174115575
cg24875854	None	10	130339677		Island
cg05668580	None	5	161494307	TSS1500;TSS1500;TSS1500		GABRG2;GABRG2;GABRG2
cg08409173	None	19	7853544	Body	Island	CLEC4GP1
cg14643537	None	6	108479584		S_Shore
cg01559726	None	3	54157894	Body	S_Shore	CACNA2D3
cg23686556	None	8	131961316	Body		ADCY8
cg19653212	None	6	42145954	Body	Island	GUCA1A
cg11095319	None	11	19263864	TSS1500	Island	E2F8
cg01297808	None	10	94180551		Island
cg11611644	None	5	170763956
cg08196032	None	14	95239751		N_Shore
cg07477034	None	17	53341969	TSS1500	N_Shore	HLF
cg04294888	None	22	28839249	Body		TTC28
cg27067425	None	19	15695299		Island
cg18994062	None	19	7853377	Body	Island	CLEC4GP1
cg12539796	None	5	7850203	Body	Island	C5orf49
cg09695735	None	17	58498977	TSS1500	Island	C17orf64
cg15790037	None	17	37321490	Body	Island	ARL5C
cg09043127	local	8	79428444	1stExon;1stExon;5'UTR;5'UTR	Island	PKIA;PKIA;PKIA;PKIA
cg17780731	None	5	67483678
cg18757941	None	1	101704441	5'UTR	S_Shore	S1PR1
cg12387154	None	6	32119639	1stExon;5'UTR	S_Shore	PRRT1;PRRT1
cg15613420	None	5	134735637	TSS1500;TSS200;TSS1500;TSS1500	S_Shore	H2AFY;H2AFY;H2AFY;H2AFY
cg00762613	None	13	36045224	Body	Island	NBEA
cg23156742	None	5	80490949	Body		RASGRF2
cg24472939	None	4	175139486		S_Shelf
cg23241781	None	14	70653964	5'UTR;5'UTR;5'UTR;5'UTR	N_Shore	SLC8A3;SLC8A3;SLC8A3;SLC8A3
cg17833265	None	17	48042135		Island
cg10179315	None	17	58498871	TSS1500	Island	C17orf64
cg02436796	None	7	116594536	Body;Body;Body;TSS200	S_Shore	ST7;ST7;ST7OT4;ST7OT1
cg02310658	local	12	50513947	Body		C12orf62
cg09398185	None	10	91061902	Body		IFIT2
cg03120361	None	11	16946921	Body	Island	PLEKHA7
cg17299935	None	17	74534077	TSS1500	Island	CYGB
cg08194009	None	17	25707428
cg04364339	None	10	91087703	5'UTR;1stExon		IFIT3;IFIT3
cg13073699	None	17	77805596		N_Shore
cg24422027	None	17	2659305		Island
cg22676470	None	19	1295929	Body	S_Shore	EFNA2
cg10275272	None	7	4784769	Body	N_Shore	FOXK1
cg12962778	global	12	54778312	Body;Body;1stExon;5'UTR		ZNF385A;ZNF385A;ZNF385A;ZNF385A
cg18201077	None	2	7017787	TSS200		RSAD2
cg23770904	None	20	61051561	TSS1500	Island	GATA5
cg09160477	None	9	95820913	TSS200	Island	SUSD3
cg23346227	global	12	57024964	Body	S_Shore	BAZ2A
cg19747632	None	15	52472703	TSS1500;Body	S_Shore	GNB5;GNB5
cg19008649	None	2	217560292	TSS200	S_Shore	IGFBP5
cg11576123	None	14	105553575		Island
cg25208969	None	17	36584843		Island
cg12155676	None	2	11970561
cg26663796	None	17	80255734
cg15048900	local	7	2086492	Body;Body;Body	N_Shelf	MAD1L1;MAD1L1;MAD1L1
cg06700061	global	6	126134218	5'UTR;5'UTR		NCOA7;NCOA7
cg12697789	None	4	186990425	5'UTR		TLR3
cg08568720	None	20	61051432	TSS1500	Island	GATA5
cg10580269	None	2	69056515
cg09069694	None	16	67571370	5'UTR	Island	FAM65A
cg09339194	None	20	61051585	TSS1500	Island	GATA5
cg19697042	local	15	92080308
cg05049335	None	11	66103889	1stExon;5'UTR	S_Shore	RIN1;RIN1
cg14791547	None	10	124222263	Body	S_Shore	HTRA1
cg27498545	local	18	8717323	TSS200		KIAA0802
cg26921881	global	17	1819914
cg02430430	None	15	74532450	Body		CCDC33
cg02668843	None	17	40575479	TSS200	Island	PTRF
cg00586700	global	19	50015178	TSS1500;TSS1500	N_Shore	FCGRT;FCGRT
cg04410989	global	20	35578437	Body	N_Shore	SAMHD1
cg25650964	global	13	33544014
cg18748374	global	17	27482619	Body;Body		MYO18A;MYO18A
cg16101806	local	5	10701439	Body		DAP
cg25746134	global	1	202129865	TSS1500;TSS200		PTPN7;PTPN7
cg26847438	global	2	231191916	5'UTR;1stExon		SP140L;SP140L
cg18518916	global	4	185456125
cg14397231	global	4	124940041
cg05192293	global	10	71934086		S_Shelf
cg11480762	local	10	73103395	Body		SLC29A3
cg26894575	global	1	153518054	5'UTR;5'UTR		S100A4;S100A4
cg18994606	global	10	111827966	5'UTR;5'UTR;5'UTR		ADD3;ADD3;ADD3
cg02502233	global	6	86379603
cg08136020	global	6	14735175
cg10142520	local	11	65344604	Body	S_Shore	EHBP1L1
cg19074748	global	11	76348764
cg00153306	local	3	46741492	TSS1500	N_Shore	TMIE
cg15059548	global	7	47344634	Body		TNS3
cg01334831	global	13	114832833	Body	N_Shelf	RASA3
cg04084348	global	10	75677011	3'UTR;5'UTR;3'UTR		PLAU;C10orf55;PLAU
cg21115558	global	6	39816319	5'UTR		DAAM2
cg02225720	global	17	3623472	Body	N_Shelf	ITGAE
cg07133729	global	7	98977840	5'UTR		ARPC1B
cg06560379	global	6	44231305	Body	N_Shore	NFKBIE
cg01429859	global	1	16163775	Body	Island	FLJ37453
cg07672688	global	16	79625412		S_Shore
cg25310081	global	12	56959642	Body		RBMS2
cg13374432	global	15	86192745	Body;Body		AKAP13;AKAP13
cg10158598	local	7	47344579	Body		TNS3
cg01093786	global	11	96047698	Body		MAML2
cg07133930	global	10	70821371
cg07071036	global	19	50014987	TSS1500;TSS1500	N_Shore	FCGRT;FCGRT
cg01939980	local	4	1354348	Body		KIAA1530
cg14643399	global	13	44706965
cg13475583	global	1	235116731
cg02816525	global	15	59024033	Body		ADAM10
cg05084610	local	8	145845573		S_Shore
cg16711650	global	1	61039539
cg14236443	global	17	943270	Body;Body;Body		ABR;ABR;ABR
cg10949007	global	5	95159614	TSS1500;TSS1500		GLRX;GLRX
cg03583857	global	1	208085022	TSS1500;TSS1500	S_Shore	CD34;CD34
cg03462322	global	16	126397	TSS1500	N_Shore	MPG
cg26969179	global	10	127738328	Body;Body		ADAM12;ADAM12
cg27558693	global	1	85710632
cg09098522	global	10	31435673
cg07003587	global	17	79259040	Body;Body	N_Shore	SLC38A10;SLC38A10
cg26802256	global	7	4652765
cg10591771	global	19	3671118	Body	N_Shore	PIP5K1C
cg05180856	global	15	91428056	5'UTR;TSS1500;5'UTR;TSS1500	S_Shore	FES;FES;FES;FES
cg25945642	global	3	143321098	Body		SLC9A9
cg08787837	global	16	86029554
cg02720566	global	19	18230196	Body	S_Shore	MAST3
cg19283806	global	18	66389420	5'UTR		CCDC102B
cg19284277	global	17	80190054	TSS200;5'UTR;5'UTR	S_Shore	SLC16A3;SLC16A3;SLC16A3
cg13411948	global	2	40575296	Body;Body;Body;Body		SLC8A1;SLC8A1;SLC8A1;SLC8A1
cg08016257	global	7	134833166	5'UTR		TMEM140
cg26620147	global	12	58210716	TSS1500		AVIL
cg18082788	global	6	149806339	TSS200		ZC3H12D
cg04197452	global	1	208083913	Body;Body	N_Shore	CD34;CD34
cg05886087	global	2	102758186		N_Shore
cg27577907	global	1	156864023	5'UTR	S_Shore	PEAR1
cg10298187	global	16	67428315	TSS1500;TSS1500	Island	TPPP3;TPPP3
cg05027125	local	6	25961768	TSS1500		TRIM38
cg04132186	global	3	184322709		S_Shore
cg18322693	global	2	217217837	Body		MARCH4
cg14035238	local	2	175499365	5'UTR;TSS200		WIPF1;WIPF1
cg17496921	local	19	11406993	1stExon	S_Shelf	TSPAN16
cg11977919	local	1	8263776
cg04254487	global	6	134304883	Body		TBPL1
cg00698602	global	3	44481324	3'UTR		ZNF445
cg19280785	global	3	134340945	Body		KY
cg02419321	global	12	54811762	Body	N_Shore	ITGA5
cg07426077	local	1	1488581	Body	N_Shore	SSU72
cg25734726	global	19	40948296	1stExon;5'UTR;5'UTR	N_Shore	SERTAD3;SERTAD3;SERTAD3
cg01924952	global	2	8627933
cg24113496	local	5	138725830	TSS1500	N_Shore	MGC29506
cg00370106	local	6	159071106	1stExon;5'UTR		SYTL3;SYTL3
cg10838410	global	12	6659524	Body;TSS1500;Body	S_Shore	IFFO1;IFFO1;IFFO1
cg12690996	global	1	6651517	3'UTR	N_Shore	KLHL21
cg23178546	local	7	157710554	Body;Body;Body		PTPRN2;PTPRN2;PTPRN2
cg08391020	global	5	74344779		N_Shelf
cg26637069	global	11	57004294	Body;1stExon		APLNR;APLNR
cg01111520	global	20	32030119	Body	N_Shore	SNTA1
cg08899504	local	1	10363631	Body;Body		KIF1B;KIF1B
cg26501007	global	8	126614261
cg23288563	global	14	21491469	Body;Body;Body;Body;Body;Body;Body;Body	N_Shore	NDRG2;NDRG2;NDRG2;NDRG2;NDRG2;NDRG2;NDRG2;NDRG2
cg04468334	global	7	149414901	5'UTR	N_Shore	KRBA1
cg00729699	global	8	21918075	5'UTR;5'UTR;5'UTR;5'UTR;5'UTR;5'UTR	S_Shelf	EPB49;EPB49;EPB49;EPB49;EPB49;EPB49
cg05233324	global	2	8628196
cg26877357	global	1	116197470	Body		VANGL1
cg08651894	local	1	154832235	Body;1stExon;5'UTR		KCNN3;KCNN3;KCNN3
cg10480584	local	5	122424091	TSS1500	N_Shore	PRDM6
cg06508867	global	16	87814178		S_Shore
cg01450566	global	20	9484340		N_Shelf
cg08818798	local	8	145848921		N_Shore
cg24979161	global	14	94567367	Body;Body		IFI27L1;IFI27L1
cg07736627	global	11	44322491	Body	N_Shelf	ALX4
cg13219896	global	7	128787598	Body	S_Shelf	TSPAN33
cg19010566	local	20	23062796	3'UTR		CD93
cg06761584	global	7	128469799	TSS1500;TSS1500	N_Shore	FLNC;FLNC
cg04682802	local	20	11898478	5'UTR;TSS200		BTBD3;BTBD3
cg25688164	global	4	10110163	Body;Body		WDR1;WDR1
cg21593835	global	3	123354036	Body;Body;Body;Body		MYLK;MYLK;MYLK;MYLK
cg02283624	local	13	111291685	3'UTR	S_Shore	CARKD
cg03382601	global	2	16157769		S_Shelf
cg18512352	global	11	47633146
cg26938014	global	5	122432628	Body	N_Shore	PRDM6
cg00908927	global	11	79152969	TSS1500	S_Shore	ODZ4
cg15863827	global	10	79363895	Body;Body;Body;Body		KCNMA1;KCNMA1;KCNMA1;KCNMA1
cg14417974	global	9	124058376	5'UTR;5'UTR;5'UTR;5'UTR;5'UTR;5'UTR;5'UTR	N_Shelf	GSN;GSN;GSN;GSN;GSN;GSN;GSN
cg18338296	local	11	77775044	1stExon		THRSP
cg11065271	global	6	159070607	TSS1500		SYTL3
cg22608534	local	22	41635548	Body	S_Shore	CHADL
cg09085358	global	11	57003857	Body;1stExon		APLNR;APLNR
cg04788372	local	10	3146053	Body	Island	PFKP
cg10296062	global	11	64528569	TSS1500;TSS1500		PYGM;PYGM
cg25170822	local	12	50344458	TSS200		AQP2
cg14151776	local	2	238647283	Body;Body;Body;Body;Body	S_Shelf	LRRFIP1;LRRFIP1;LRRFIP1;LRRFIP1;LRRFIP1
cg00330958	global	3	39184552	Body	N_Shore	CSRNP1
cg25072179	global	11	57004934	TSS200;TSS200		APLNR;APLNR
cg21523688	global	15	45319037	Body	S_Shelf	SORD
cg00704554	local	11	133902198	Body		LOC100128239
cg00529757	local	6	32136052	3'UTR;3'UTR;3'UTR	S_Shore	AGPAT1;AGPAT1;EGFL8
cg02981663	global	13	28232083	Body		POLR1D
cg25484252	global	3	72184399
cg07814318	global	15	31624584	Body	S_Shelf	KLF13
cg22079077	local	15	41061384	Body;TSS1500		DNAJC17;C15orf62
cg01448881	global	1	160084263	TSS1500		ATP1A2
cg02863169	global	2	45173548		S_Shore
cg05784201	local	9	139407609	Body	N_Shore	NOTCH1
cg10055231	local	1	6651358	3'UTR	N_Shelf	KLHL21
cg21238833	local	9	96069905	Body	S_Shore	WNK2
cg20873136	global	2	129037710	Body		HS6ST1
cg19989242	local	9	96069142	Body	Island	WNK2
cg20697044	global	17	64971888	Body		CACNG4
cg13435432	global	6	108489292	Body	Island	NR2E1
cg15416877	global	6	108492769	Body	S_Shore	NR2E1
cg26651514	global	13	33864734
cg03914735	global	3	140953689	5'UTR;5'UTR	S_Shelf	ACPL2;ACPL2
cg07538204	global	8	62612575	Body;Body;Body;Body;Body		ASPH;ASPH;ASPH;ASPH;ASPH
cg01800445	global	1	3129115	Body;Body		PRDM16;PRDM16
cg00505570	global	10	118895568	Body;Body	N_Shore	VAX1;VAX1
cg22126499	global	22	20100031	3'UTR;3'UTR	N_Shelf	TRMT2A;TRMT2A
cg06497848	global	10	118896363	Body;Body	Island	VAX1;VAX1
cg09841788	global	14	65213478	3'UTR	N_Shelf	SPTB
cg00052385	global	8	134580580	5'UTR;5'UTR	N_Shore	ST3GAL1;ST3GAL1
cg02632542	global	17	72210669	TSS1500;Body	S_Shore	MGC16275;TTYH2
cg07710971	global	16	46920836	Body;5'UTR	S_Shore	GPT2;GPT2
cg13948857	global	5	131763756	Body		C5orf56
cg20888521	local	17	43977917	5'UTR;5'UTR;5'UTR;5'UTR;5'UTR;5'UTR	S_Shelf	MAPT;MAPT;MAPT;MAPT;MAPT;MAPT
cg10097755	global	1	3034236	Body;Body	N_Shelf	PRDM16;PRDM16
cg08030282	global	1	160967582	3'UTR		F11R
cg08777771	global	2	233278	Body;Body		SH3YL1;SH3YL1
cg00448875	local	3	133611626	Body	N_Shore	RAB6B
cg22862005	global	1	205884321	3'UTR;3'UTR;Body		SLC26A9;SLC26A9;SLC26A9
cg20893542	local	3	187929286	TSS1500;5'UTR		LPP;LPP
cg02687352	global	2	97557285	Body;Body		FAM178B;FAM178B
cg22388948	local	6	82460558	Body	N_Shore	FAM46A
cg16465012	local	4	3527577	Body	S_Shore	LRPAP1

## Sheet: Additional table 6
	precision	recall	f1-score	support
(anaplastic) pleomorphic xanthoastrocytoma	0.944444	0.894737	0.918919	19
Anaplastic pilocytic astrocytoma	0.875	0.7	0.777778	20
Atypical teratoid/rhabdoid tumor subclass SHH	1	1	1	2
Atypical teratoid/rhabdoid tumor subclass TYR	1	1	1	2
CNS high grade neuroepithelial tumor with BCOR alteration	1	1	1	3
CNS high grade neuroepithelial tumor with MN1 alteration	1	1	1	2
CNS neuroblastoma with FOXR2 activation	1	1	1	4
Central neurocytoma	1	1	1	2
Diffuse midline glioma H3 K27M mutant	0.846154	0.916667	0.88	36
Embryonal tumor with multilayered rosettes	1	1	1	5
Ependymoma RELA fusion	1	1	1	16
Ependymoma myxopapillary	1	1	1	15
Ependymoma posterior fossa group A	1	1	1	33
Ependymoma posterior fossa group B	1	0.857143	0.923077	7
Ependymoma spinal	1	1	1	6
Glioblastoma IDH wildtype H3.3 G34 mutant	1	1	1	11
Glioblastoma IDH wildtype subclass MYCN	1	0.571429	0.727273	14
Glioblastoma IDH wildtype subclass RTK I	0.761905	0.842105	0.8	38
Glioblastoma IDH wildtype subclass RTK II	0.82	0.752294	0.784689	109
Glioblastoma IDH wildtype subclass mesenchymal	0.8	0.888889	0.842105	99
Hemangioblastoma	0.666667	1	0.8	2
IDH glioma subclass 1p/19q codeleted oligodendroglioma	0.953488	1	0.97619	82
IDH glioma subclass astrocytoma	0.905263	0.945055	0.924731	91
IDH glioma subclass high grade astrocytoma	0.884615	0.676471	0.766667	34
Low grade glioma MYB/MYBL1	1	1	1	5
Low grade glioma dysembryoplastic neuroepithelial tumor	0.461538	1	0.631579	6
Low grade glioma ganglioglioma	0.8	0.8	0.8	5
Low grade glioma subclass hemispheric pilocytic astrocytoma and ganglioglioma	1	0.789474	0.882353	19
Low grade glioma subclass midline pilocytic astrocytoma	1	0.875	0.933333	16
Low grade glioma subclass posterior fossa pilocytic astrocytoma	0.971429	0.971429	0.971429	35
Low grade glioma subependymal giant cell astrocytoma	0.5	1	0.666667	1
Medulloblastoma WNT	1	1	1	7
Medulloblastoma subclass SHH A (children and adult)	1	0.975	0.987342	40
Medulloblastoma subclass SHH B (infant)	0.916667	1	0.956522	11
Medulloblastoma subclass group 3	0.95	0.95	0.95	20
Medulloblastoma subclass group 4	0.973684	0.973684	0.973684	38
Melanocytoma	1	1	1	4
Meningioma	1	1	1	50
Papillary tumor of the pineal region group B	1	1	1	1
Paraganglioma spinal non-CIMP	1	1	1	1
Pineal parenchymal tumor	1	1	1	1
Pituicytoma / granular cell tumor / spindle cell oncocytoma	1	1	1	1
Pituitary adenoma ACTH	1	1	1	1
Pituitary adenoma FSH/LH	1	1	1	1
Plexus tumor subclass adult	1	1	1	1
Plexus tumor subclass pediatric A	1	1	1	1
Plexus tumor subclass pediatric B	1	1	1	2
Schwannoma	1	1	1	6
Solitary fibrous tumor / hemangiopericytoma	1	1	1	1
Subependymoma posterior fossa	1	1	1	2
Subependymoma supratentorial	1	1	1	1
accuracy	0.904198	0.904198	0.904198	0.904198
macro avg	0.941781	0.948615	0.938712	929
weighted avg	0.910405	0.904198	0.903845	929
